# Supplementary material for: N-Heterocycle-coordinated λ5-iodanes as IBX alternatives for alcohol oxidations
Source: Royal Society of Chemistry journal article supplement (doi:10.1039/d4cc05058d), 2024-12-09

## Supporting information

### ***N*-Heterocycle-Coordinated $\lambda^5$ -Iodanes as IBX Alternatives for Alcohol Oxidations**

Nikita S. Antonkin<sup>a</sup>, Yulia A. Vlasenko<sup>a</sup>, Pim Puylaert<sup>b</sup>, Boris J. Nachtsheim<sup>\*b</sup>, Pavel S. Postnikov<sup>\*a</sup>.

<sup>a</sup> Research School of Chemistry and Applied Biomedical Sciences, Tomsk Polytechnic University, Tomsk 634050, Russian Federation. E-mail: [postnikov@tpu.ru](mailto:postnikov@tpu.ru)

<sup>b</sup> Institut für Organische und Analytische Chemie, Universität Bremen, Leobener Straße NW2C, 28359 Bremen, Germany. E-mail: [nachtsheim@uni-bremen.de](mailto:nachtsheim@uni-bremen.de)

Prof. Dr. Boris J. Nachtsheim, [nachtsheim@uni-bremen.de](mailto:nachtsheim@uni-bremen.de)  
Prof. Dr. Pavel S. Postnikov, [postnikov@tpu.ru](mailto:postnikov@tpu.ru)

## Table of content

|                                                                |           |
|----------------------------------------------------------------|-----------|
| <b>1. General information.....</b>                             | <b>3</b>  |
| <b>2. Preparation of iodoarenes 1.....</b>                     | <b>4</b>  |
| <b>3. Preparation of <math>\lambda^5</math>-Iodanes 2.....</b> | <b>6</b>  |
| <b>4. Preparation of carbonyl compounds 3.....</b>             | <b>8</b>  |
| <b>5. Additional experiments .....</b>                         | <b>13</b> |
| <b>6. Thermal analysis plots .....</b>                         | <b>15</b> |
| <b>6. Crystal data .....</b>                                   | <b>17</b> |
| <b>References .....</b>                                        | <b>34</b> |
| <b>Spectral data .....</b>                                     | <b>35</b> |

## 1. General information

Reagents were used as received from their commercial supplier (abcr, Acros Organics, Alfa Aesar, Apollo Scientific, Carbolution Chemicals, Sigma Aldrich, TCI, fluorochem, BLD pharm). All solvents were dried using standard methods.<sup>7</sup> Unless otherwise stated, all yields refer to isolated yields of compounds estimated to be >95% pure as determined by <sup>1</sup>H-NMR spectroscopy.

Thin layer chromatography was performed on fluorescence indicator marked precoated silica gel 60 plates (Macherey-Nagel, ALUGRAM Xtra SIL G/UV254) and visualized by UV light (254 nm/366 nm). Column chromatography was performed on silica gel (0.040 – 0.063 mm) with the solvents given in the procedures. <sup>1</sup>H, <sup>13</sup>C and <sup>19</sup>F NMR spectra were recorded on Bruker Avance Neo 600 (600 MHz) or Bruker AVANCE III HD (400 MHz). Chemical shifts for <sup>1</sup>H NMR spectra were reported as  $\delta$  (parts per million) relative to the residual signal of CDCl<sub>3</sub> at 7.26 ppm (s) or DMSO-*d*<sub>6</sub> at 2.50 ppm. Chemical shifts for <sup>13</sup>C NMR spectra were reported as  $\delta$  (parts per million) relative to the signal of CDCl<sub>3</sub> at 77.0 ppm (t) or DMSO-*d*<sub>6</sub> at 39.5 ppm (sept.). The following abbreviations were used to describe splitting patterns: br = broad, s = singlet, d = doublet, t = triplet, q = quartet, quin = quintet, sext. = sextet, sept = septet, m = multiplet. Coupling constants *J* are given in Hertz.

HR-ESI mass spectra were recorded on a Bruker impact II (QTOF). APCI mass spectra and reaction control via TLC-MS were recorded on an Advion Expression CMSL via ASAP probe or direct inlet. EI mass spectra were obtained from an Agilent 7890B GC System with an Agilent 5977A MSD mass spectrometer. All signals were reported with *m/z* ratio. A solvent for HR-ESI mass spectra measurements specified for each compound.

Melting points were determined on a Büchi M-5600 Melting Point apparatus with a heating rate of 1 °C/min. The melting points were reported in °C. Most of the hypervalent iodine compounds underwent changes in appearance (e.g. softening) before final melting/decomposition.

Conditions for single crystal growth specified for each compound. Suitable crystals were selected and measured on a Bruker D8 Venture diffractometer. The crystal was kept at 100 K during data collection. The structures were solved by the ShelXT<sup>2</sup> structure solution program using Intrinsic Phasing and refined with the ShelXL<sup>3</sup> refinement package incorporated in the OLEX2 program package<sup>4</sup> using Least Squares minimization. The ORTEP drawing was made using the program Mercury from the CCDC.

Simultaneous TGA-DSC testing was carried out with Q600 Simultaneous TGA-DTA-DSC analyzer (TA Instruments) or Mettler Toledo TGA/DSC 3+ STAR<sup>e</sup> system in an open corundum crucible under air atmosphere at rates specified for each compound. The temperature of oven was held at rt for 1 minute, then heated from rt to temperature specified in the graphs.

IBX was synthesized according to the literature procedure.<sup>5</sup> The analytical data are in accordance with previously reported.<sup>6</sup>

<sup>1</sup>H NMR (600 MHz, DMSO-*d*<sub>6</sub>)  $\delta$  8.14 (d, *J* = 7.8 Hz, 1H), 8.03 (d, *J* = 7.8 Hz, 1H), 8.00 (t, *J* = 7.8 Hz, 1H), 7.84 (t, *J* = 7.2 Hz, 1H). m.p. = 230-232 °C (lit. 233 °C).<sup>6</sup>

## 2. Preparation of iodoarenes 1.

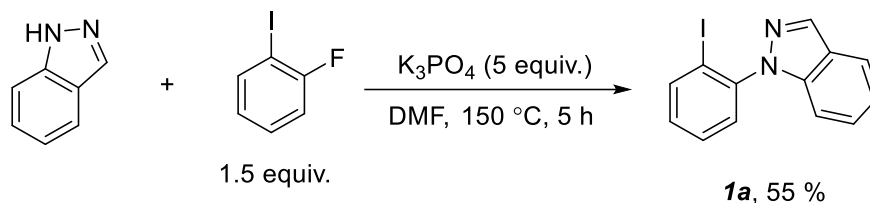

**1a:** According to a modified literature procedure<sup>7</sup> Indazole (7 mmol, 0.827 g) and  $K_3PO_4$  (35 mmol, 7.43 g) were charged in a 250-mL round-bottom flask and DMF (70 mL) was added. 2-Iodofluorobenzene (10.5 mmol, 2.33 g) was added *via* syringe. The reaction mixture was allowed to stir for 5 h at 150 °C (oil bath). Afterwards the mixture was cooled to room temperature and 170 mL of water was added. The water layer was extracted with  $Et_2O$  ( $3 \times 100$  mL). Combined organic layer was washed with brine ( $2 \times 10$  mL), dried over anhydrous  $Na_2SO_4$ , filtered and the solvent was removed under reduced pressure. The residue was purified by column chromatography on silica (hexane  $\rightarrow$  hexane:EtOAc – 30:1) to give 1-(2-iodophenyl)-1*H*-indazole **1a** as a white slowly crystallizing solid (*It could crystallize over the period of several days to several weeks*), 1.24 g (55 %). mp = 74 – 75 °C. The analytical data are in accordance with previously published.<sup>7</sup>

$^1H$  NMR (400 MHz,  $CDCl_3$ )  $\delta$  8.24 (s, 1H), 8.05 (d,  $J = 8.0$  Hz, 1H), 7.83 (d,  $J = 8.0$  Hz, 1H), 7.52 (t,  $J = 7.6$  Hz, 1H), 7.45 – 7.38 (m, 2H), 7.25 – 7.20 (m, 3H).

$^{13}C$  NMR (100 MHz,  $CDCl_3$ )  $\delta$  142.1, 140.4, 140.2, 135.4, 130.7, 129.5, 129.3, 127.1, 124.4, 121.5, 121.3, 110.6, 96.8.

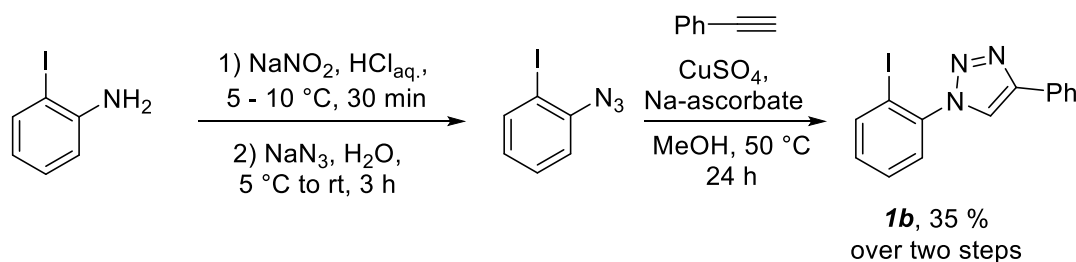

**1b:** According to a modified literature procedure<sup>7</sup> 2-iodoaniline (20 mmol, 4.38 g) was suspended in conc. HCl (32 mL) diluted with  $H_2O$  (40 mL) and the mixture was cooled with an ice-water bath (approx. 5-10 °C).  $NaNO_2$  (22 mmol, 1.52 g) as the water solution (10 mL) was added dropwise. The reaction mixture was stirred for 30 min under cooling. Afterwards the aqueous solution (10 mL) of  $NaN_3$  (30 mmol, 1.95 g) was added under cooling with an ice-water bath and the bath was removed. The reaction proceeded for additional 3 h at room temperature followed by the addition of  $NaHCO_3$  sat. solution until slightly basic pH. The water layer was extracted with DCM ( $4 \times 50$  mL). Combined organic layer was washed with  $H_2O$  ( $2 \times 15$  mL), dried over anhydrous  $Na_2SO_4$ , filtered and the solvent was removed under reduced pressure. The crude residue was used further without any purification.

The residue was dissolved in MeOH (40 mL) and phenyl acetylene (30 mmol, 3.3 mL),  $CuSO_4 \cdot 5H_2O$  (4 mmol, 1 g) and sodium ascorbate (10 mmol, 1.98 g) were added to the solution. The mixture was allowed to stir for 24 h at 50 °C (oil bath). Water (160 mL) was added upon cooling to room temperature. The aqueous layer was extracted with DCM ( $3 \times 100$  mL). Combined organic layer was dried over  $Na_2SO_4$ , filtered and the solvent was removed under reduced pressure. The crude mixture was purified *via* column chromatography on silica (cyclohexane:EtOAc – 9:1  $\rightarrow$  4:1) to give 1-(2-iodophenyl)-4-phenyl-1*H*-1,2,3-triazole **1b** as a yellowish solid, 2.43 g (35 %). mp = 152 – 155 °C (lit. 156 – 158 °C).<sup>8</sup> The analytical data are in accordance with previously published.<sup>8</sup>

$^1H$  NMR (400 MHz,  $CDCl_3$ )  $\delta$  8.09 (s, 1H), 8.03 (d,  $J = 8.0$  Hz, 1H), 7.94 (d,  $J = 7.6$  Hz, 2H), 7.57 – 7.43 (m, 4H), 7.38 (t,  $J = 7.2$  Hz, 1H), 7.29 – 7.22 (m, 1H).

$^{13}\text{C}$  NMR (100 MHz,  $\text{CDCl}_3$ )  $\delta$  147.8, 140.4, 140.2, 131.7, 130.3, 129.4, 129.1, 128.6, 128.0, 126.0, 121.7, 94.1.

### 3. Preparation of $\lambda^5$ -Iodanes 2.

**General procedure (GP1):** iodoarene **1** (0.3 mmol) was dissolved in MeCN (3.75 mL). Oxone<sup>®</sup> (5 equiv., 1.5 mmol, 0.923 g) was added to the mixture neat. Afterwards H<sub>2</sub>O (3.75 mL) was added and the mixture was allowed to stir for indicated time at 65 °C (oil bath). Then the reaction was cooled to room temperature and H<sub>2</sub>O (15 mL) was added to precipitate the product. The suspension was additionally stored at 4 °C for 3 – 6 h to achieve full precipitation of the solid. Then it was filtered, washed with cold water (3 × 10 mL) and acetone (3 × 3 mL) and dried under vacuum to give iodane **2**.

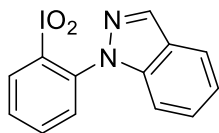

**2a:** according to **GP1** iodoarene **1a** (0.3 mmol, 96 mg) reacted with Oxone<sup>®</sup> for 5 h to give 1-(2-iodylphenyl)-1*H*-indazole **2a** as a pale yellow solid, 76 – 86 mg (72 – 81 %). mp = 195 – 196 °C (dec.).

<sup>1</sup>H NMR (600 MHz, DMSO-*d*<sub>6</sub>)  $\delta$  8.62 (s, 1H), 8.27 (dd, *J* = 7.8, 0.6 Hz, 1H), 8.15 (d, *J* = 8.4 Hz, 1H), 8.13 (d, *J* = 7.8 Hz, 1H), 8.00 (d, *J* = 7.8 Hz, 1H), 7.81 – 7.78 (m, 1H), 7.67 – 7.63 (m, 2H), 7.39 (t, *J* = 7.2 Hz, 1H).

<sup>13</sup>C NMR (150 MHz, DMSO-*d*<sub>6</sub>)  $\delta$  141.4, 137.8, 136.9, 136.6, 132.9, 129.1, 126.3, 126.1, 125.7, 122.9, 122.3, 119.6, 111.4.

HRMS (positive mode, MeCN+0.1 % of formic acid) calcd. for C<sub>13</sub>H<sub>10</sub>IN<sub>2</sub>O<sub>2</sub><sup>+</sup> ([M+H]<sup>+</sup>) 352.97815 (found 352.97821).

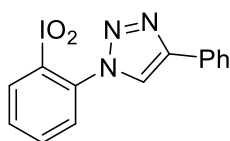

**2b:** according to **GP1** iodoarene **1b** (0.3 mmol, 104 mg) reacted with Oxone<sup>®</sup> for 10 h to give 1-(2-iodylphenyl)-4-phenyl-1*H*-1,2,3-triazole **2b** as a white solid, 73 mg (64 %). mp = 215 - 216 °C (vigorous dec.; **handle with care!**).

<sup>1</sup>H NMR (600 MHz, DMSO-*d*<sub>6</sub>)  $\delta$  9.61 (s, 1H), 8.31 (dd, *J* = 7.8, 1.2 Hz, 1H), 8.06 (dd, *J* = 7.8, 1.2 Hz, 1H), 7.98 (d, *J* = 7.8 Hz, 2H), 7.85 (td, *J* = 7.2, 1.2 Hz, 1H), 7.81 (td, *J* = 7.8, 1.2 Hz, 1H), 7.55 (t, *J* = 7.8 Hz, 2H), 7.44 (t, *J* = 7.2 Hz, 1H).

<sup>13</sup>C NMR (150 MHz, DMSO-*d*<sub>6</sub>)  $\delta$  148.2, 140.5, 133.2, 133.0, 129.5, 129.3, 129.2, 128.9, 125.6, 125.5, 119.8, 119.8.

HRMS (positive mode, MeCN+0.1 % of formic acid) calcd. for C<sub>14</sub>H<sub>11</sub>IN<sub>3</sub>O<sub>2</sub><sup>+</sup> ([M+H]<sup>+</sup>) 379.98905 (found 379.98815).

#### **Gram-scale synthesis of iodane 2a.**

1-(2-Iodophenyl)-1*H*-indazole **1a** (3.85 mmol, 1.23 g) was dissolved in MeCN (48 mL). Oxone<sup>®</sup> (9.23 mmol, 11.83 g) was added to the mixture neat. Afterwards H<sub>2</sub>O (48 mL) was added and the mixture was allowed to stir for 5 h at 65 °C (oil bath). Then the reaction was cooled to room temperature and H<sub>2</sub>O (190 mL) was added to precipitate the product. The suspension was additionally stored at 4 °C overnight to achieve full precipitation of the solid. Then it was filtered, washed with cold water (3 × 100 mL) and acetone (3 × 15 mL) and dried under vacuum to give 1-(2-iodylphenyl)-1*H*-indazole **2a** as a yellowish solid, 1.02 g (75 %). mp = 194 – 195 °C. NMR spectra are in accordance with the product **2a**.

#### **In situ preparation of iodane 2a'**

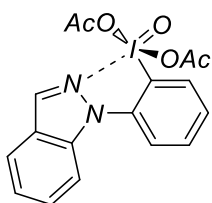

**2a'**: 1-(2-iodylphenyl)-1*H*-indazole **2a** (0.1 mmol, 35 mg) was suspended in CDCl<sub>3</sub> (2 mL) and Ac<sub>2</sub>O (3 equiv., 28  $\mu$ L) was added. The reaction mixture was allowed to stir at room temperature for 6 h until the clear solution was observed. The sample from the mixture (approx. 0.3 mL) was diluted with CDCl<sub>3</sub> and NMR spectra were recorded.

<sup>1</sup>H NMR (600 MHz, CDCl<sub>3</sub>)  $\delta$  8.63 (d,  $J$  = 8.4 Hz, 1H), 8.40 (s, 1H), 8.12 (d,  $J$  = 8.4 Hz, 1H), 8.04 (d,  $J$  = 9.0 Hz, 1H), 7.91 (d,  $J$  = 8.4 Hz, 1H), 7.83 (t,  $J$  = 7.8 Hz, 1H), 7.70 (t,  $J$  = 7.8 Hz, 1H), 7.66 (t,  $J$  = 7.8 Hz, 1H), 7.41 – 7.39 (m, 1H), 1.78 (s, 6H).

<sup>13</sup>C NMR (150 MHz, CDCl<sub>3</sub>)  $\delta$  177.2, 138.4, 137.3, 136.5, 135.7, 133.9, 130.1, 126.9, 126.7, 126.2, 123.9, 122.9, 118.8, 111.4, 20.9.

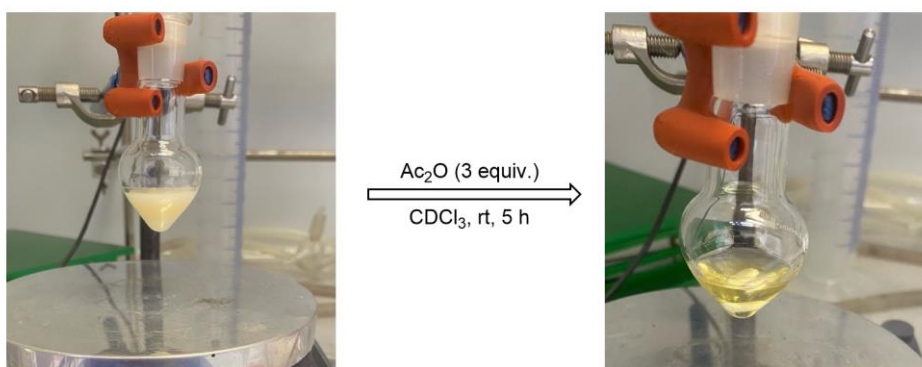

**Figure 1.** Preparation of iodane **2a'**.

#### 4. Preparation of carbonyl compounds 3.

**Table 1.** Optimization of 1-phenylethanol oxidation with iodanes **2**

| No                    | Iodane    | Solvent                     | Additive                            | Temp.     | Yield <sup>a,b</sup>       |
|-----------------------|-----------|-----------------------------|-------------------------------------|-----------|----------------------------|
| 1                     | <b>2a</b> | CDCl <sub>3</sub>           | -                                   | rt        | traces                     |
| 2                     | <b>2b</b> | CDCl <sub>3</sub>           | -                                   | rt        | 2 %                        |
| 3 <sup>c</sup>        | <b>2a</b> | CDCl <sub>3</sub>           | TFA (2.6 equiv.)                    | rt        | 70 %                       |
| 4 <sup>c</sup>        | <b>2b</b> | CDCl <sub>3</sub>           | TFA (2.6 equiv.)                    | rt        | 58 %                       |
| 5                     | <b>2a</b> | MeCN- <i>d</i> <sub>3</sub> | -                                   | rt        | 2 %                        |
| 6                     | <b>2a</b> | MeCN- <i>d</i> <sub>3</sub> | -                                   | 50 °C     | 4 %                        |
| 7                     | <b>2a</b> | DMSO- <i>d</i> <sub>6</sub> | -                                   | rt        | 6 %                        |
| 8 <sup>c</sup>        | <b>2a</b> | CDCl <sub>3</sub>           | Ac <sub>2</sub> O (1.3 equiv.)      | rt        | 10 % <sup>c</sup>          |
| 9 <sup>c</sup>        | <b>2a</b> | CDCl <sub>3</sub>           | Ac <sub>2</sub> O (2.6 equiv.)      | rt        | 66 % <sup>c</sup>          |
| <b>10<sup>c</sup></b> | <b>2a</b> | <b>CDCl<sub>3</sub></b>     | <b>Ac<sub>2</sub>O (3.9 equiv.)</b> | <b>rt</b> | <b>quant.</b> <sup>c</sup> |
| 11 <sup>c</sup>       | <b>2a</b> | CDCl <sub>3</sub>           | TFAA (2.6 equiv.)                   | rt        | 75 % <sup>c</sup>          |
| 12 <sup>c</sup>       | <b>2a</b> | CDCl <sub>3</sub>           | TFAA (3.9 equiv.)                   | rt        | 55 % <sup>c</sup>          |
| 13 <sup>c</sup>       | <b>2a</b> | CDCl <sub>3</sub>           | AcOH (7.8 equiv.)                   | rt        | traces                     |

Reaction conditions: <sup>a</sup> Reaction conditions: 0.1 mmol of 1-phenylethanol (0.1 mmol, 12 mg), **2** (0.13 mmol), solvent (2 mL). <sup>b</sup> Yields were determined by NMR with 1,2-dibromoethane as an internal standard; <sup>c</sup> λ<sup>5</sup>-iodane was premixed with an additive in 1 mL of the solvent for 30 minutes and the alcohol was added afterwards as the solution in the reaction solvent (1 mL, 2 mL for a reaction in total).

#### Supplementary Note 1:

Iodanes **2a** and **2b** were practically inactive without additives (Table 1, entries 1, 2, 5-7). TFA as an additive improved the yields to 70 % and 58 % for **2a** and **2b** respectively (Table 1, entries 3 and 4). Ac<sub>2</sub>O were an additive of choice since three-fold excess of it gave the quant. yield after 24 h (Table 1, entry 10). TFAA as an additive also was a good option yet the acylation of the alcohol lowered the yield of desired ketone **3i** (Table 1, entries 11-12). Control experiment with AcOH afforded only traces of the product (Table 1, entry 13).

**For the preparation of the scope of carbonyl compounds DCM was used instead of CHCl<sub>3</sub> since commercial chloroform contains ethanol as a stabilizer which reacts with iodanes itself. To avoid purification of the solvent such replacement was made.**

**General procedure (GP2):** 1-(2-Iodophenyl)-1*H*-indazole **2a** (0.13 mmol, 46 mg) was charged in a reaction vessel and DCM (1 mL) was added. Ac<sub>2</sub>O (0.39 mmol, 36.6 μL) was added and the mixture was allowed to stir at room temperature for 30 min following by addition of the solution of an alcohol (0.1 mmol) in DCM (1 mL). The reaction vessel was capped and the reaction was stirred for 24 h at room temperature.

**Purification procedure A:** after **GP2** the solvent was removed under reduced pressure and the residue was purified *via* column chromatography on silica (eluent specified for each compound) to give carbonyl compound **3**.

**Purification procedure B:** after **GP2** the solution was filtered through a pad of silica (2-3 cm) and washed with hexane:EtOAc – 4:1 (approx. 70-80 mL) to get rid of remaining iodane. Then solvent was removed and 5 mL of sat. NaHSO<sub>3</sub> aqueous solution was added. The solution was stirred for at least 3 h at room temperature and all the impurities was extracted with hexane:EtOAc – 4:1 (4 × 5 mL). The water layer was basified with NaOH 50 % solution and extracted with DCM (3 × 5 mL). Combined organic layers were washed with water (2 × 2 mL) and dried over anhydrous Na<sub>2</sub>SO<sub>4</sub>. The solution was filtered and the solvent was removed under reduced pressure to give carbonyl compounds **3**.



**General procedure (GP3):** 1-(2-Iodophenyl)-1*H*-indazole **2a** (0.13 mmol, 46 mg) was charged in a reaction vessel and CDCl<sub>3</sub> (1 mL) was added. Ac<sub>2</sub>O (0.39 mmol, 36.6 μL) or TFA (0.39 mmol, 30 μL) was added and the mixture was allowed to stir at room temperature for 30 min following by addition of the solution of an alcohol (0.1 mmol) in CDCl<sub>3</sub> (1 mL). The reaction vessel was capped and the reaction was stirred for 24 h at room temperature. Then NaHCO<sub>3</sub> (0.8 mmol, 67 mg) was added neat and the mixture was allowed to stir for 30 min. 1,2-Dibromoethane (0.1 mmol, 8.7 μL) was added as an internal standard, 0.5 mL of the mixture was filtered and <sup>1</sup>H NMR was recorded to determine the NMR yield (*integration of the aldehyde proton*).

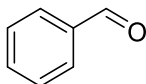

**3a:** according to **GP3** benzyl alcohol (0.1 mmol, 11 mg) reacted with iodane **2a** in the presence of Ac<sub>2</sub>O to give benzaldehyde **3a**, NMR yield: 70 %.

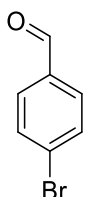

**3b:** according to **GP2** 4-bromobenzyl alcohol (0.1 mmol, 19 mg) reacted with iodane **2a** followed by column chromatography (cyclohexane:EtOAc – 50:1) (**purification procedure A**) to give 4-bromobenzaldehyde **3b** as a colorless solid, 18 mg (96 %). mp = 52 – 53 °C (lit. 51.8 – 53.2°C).<sup>9</sup> The analytical data are in accordance with previously published.<sup>9</sup>

<sup>1</sup>H NMR (600 MHz, CDCl<sub>3</sub>) δ 9.98 (s, 1H), 7.75 (d, *J* = 8.4 Hz, 2H), 7.69 (d, *J* = 8.4 Hz, 2H).

<sup>13</sup>C NMR (150 MHz, CDCl<sub>3</sub>) δ 191.2, 135.2, 132.6, 131.1, 129.9.

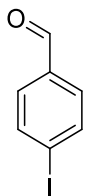

**3c:** according to **GP2** 4-iodobenzyl alcohol (0.1 mmol, 23.5 mg) reacted with iodane **2a** followed by column chromatography (cyclohexane:EtOAc – 30:1) (**purification procedure A**) to give 4-iodobenzaldehyde **3c** as a colorless solid, 22.5 mg (97 %). mp = 74 – 74 °C (lit. 74 – 75°C).<sup>10</sup> The analytical data is in accordance with previously published.<sup>11</sup>

<sup>1</sup>H NMR (600 MHz, DMSO-*d*<sub>6</sub>) δ 9.96 (s, 1H), 8.01 (d, *J* = 7.8 Hz, 2H), 7.67 (d, *J* = 7.8 Hz, 2H).

<sup>13</sup>C NMR (150 MHz, DMSO-*d*<sub>6</sub>) δ 192.7, 138.1, 135.4, 130.9, 103.6.

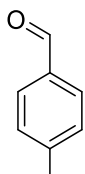

**3d:** according to **GP2** 4-methylbenzyl alcohol (0.1 mmol, 12 mg) reacted with iodane **2a** and after **purification procedure B** gave 4-methylbenzaldehyde **3d** as a yellowish liquid, 6.5 mg (55 %). The analytical data are in accordance with previously published.<sup>12</sup>

<sup>1</sup>H NMR (400 MHz, CDCl<sub>3</sub>) δ 9.96 (s, 1H), 7.78 (d, *J* = 8.0 Hz, 2H), 7.33 (d, *J* = 8.0 Hz, 2H), 2.44 (s, 3H).

<sup>13</sup>C NMR (100 MHz, CDCl<sub>3</sub>) δ 192.2, 145.7, 134.3, 130.0, 129.9, 22.0.

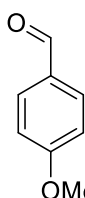

**3e**: according to **GP2** 4-methoxybenzyl alcohol (0.1 mmol, 14 mg) reacted with iodane **2a** followed by column chromatography (gradient elution: hexane:EtOAc – 20:1 → hexane:EtOAc – 10:1) (**purification procedure A**) to give 4-methoxybenzaldehyde **3e** as a colorless oil, 6.5 mg (55 %). The analytical data is in accordance with previously published.<sup>13</sup>

<sup>1</sup>H NMR (400 MHz, DMSO-*d*<sub>6</sub>) δ 9.87 (s, 1H), 7.87 (d, *J* = 8.4 Hz, 2H), 7.13 (d, *J* = 8.4 Hz, 2H), 3.86 (s, 3H).

<sup>13</sup>C NMR (100 MHz, DMSO-*d*<sub>6</sub>) δ 191.3, 164.2, 131.8, 129.7, 114.5, 55.7.

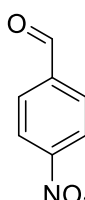

**3f**: according to **GP2** 4-nitrobenzyl alcohol (0.1 mmol, 14 mg) reacted with iodane **2a** followed by column chromatography (gradient elution: hexane → hexane:EtOAc – 10:1) (**purification procedure A**) to give 4-nitrobenzaldehyde **3f** as a colorless solid, 15 mg (> 99 %). m.p. = 104 – 105 °C (lit. 104 – 105 °C).<sup>14</sup> The analytical data are in accordance with previously published.<sup>15</sup>

<sup>1</sup>H NMR (400 MHz, DMSO-*d*<sub>6</sub>) δ 10.16 (s, 1H), 8.42 (d, *J* = 8.4 Hz, 2H), 8.16 (d, *J* = 8.4 Hz, 2H).

<sup>13</sup>C NMR (100 MHz, DMSO-*d*<sub>6</sub>) δ 192.4, 150.6, 140.1, 130.6, 124.3.

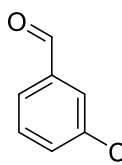

**3g**: according to **GP2** 3-chlorobenzyl alcohol (0.1 mmol, 14 mg) reacted with iodane **2a** and after **purification procedure B** gave 3-chlorobenzaldehyde **3g** as a yellow liquid, 8 mg (57 %). The analytical data are in accordance with previously published.<sup>16</sup>

<sup>1</sup>H NMR (400 MHz, CDCl<sub>3</sub>) δ 9.98 (s, 1H), 7.86 (s, 1H), 7.77 (d, *J* = 7.6 Hz, 1H), 7.61 (d, *J* = 8.0 Hz, 1H), 7.49 (t, *J* = 7.6 Hz, 1H).

<sup>13</sup>C NMR (100 MHz, CDCl<sub>3</sub>) δ 191.0, 137.9, 135.6, 134.6, 130.5, 129.5, 128.1.

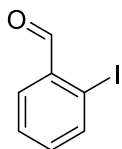

**3h**: according to **GP2** 2-iodobenzyl alcohol (0.1 mmol, 23 mg) reacted with iodane **2a** followed by column chromatography (hexane:EtOAc – 20:1) (**purification procedure A**) to give 2-iodobenzaldehyde **3h** as a colorless solid, 18.5 mg (80 %). m.p. = 32 – 33 °C (lit. 30 – 31 °C).<sup>17</sup> The analytical data are in accordance with previously published.<sup>17</sup>

<sup>1</sup>H NMR (400 MHz, CDCl<sub>3</sub>) δ 10.07 (d, *J* = 0.8 Hz, 1H), 7.96 (dd, *J* = 8.0, 0.8 Hz, 1H), 7.89 (dd, *J* = 8.0, 1.6 Hz, 1H), 7.47 (tt, *J* = 7.6, 0.8 Hz, 1H), 7.31 – 7.27 (m, 1H).

<sup>13</sup>C NMR (100 MHz, CDCl<sub>3</sub>) δ 196.0, 140.8, 135.6, 135.3, 130.4, 128.9, 100.9.

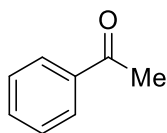

**3i:** according to **GP2** 1-phenylethanol (0.1 mmol, 12 mg) reacted with iodane **2a** followed by column chromatography (cyclohexane:EtOAc – 50:1) (**purification procedure A**) to give acetophenone **3i** as a yellowish liquid, 9.5 mg (79 %). The analytical data are in accordance with previously published.<sup>18</sup>

<sup>1</sup>H NMR (600 MHz, CDCl<sub>3</sub>) δ 7.97 (d, *J* = 7.2 Hz, 2H), 7.57 (t, *J* = 7.2 Hz, 1H), 7.47 (t, *J* = 7.8 Hz, 2H), 2.61 (s, 3H).

<sup>13</sup>C NMR (150 MHz, CDCl<sub>3</sub>) δ 198.3, 137.3, 133.3, 128.7, 128.5, 26.8.

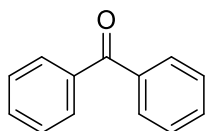

**3j:** according to **GP2** diphenylmethanol (0.1 mmol, 18.5 mg) reacted with iodane **2a** followed by column chromatography (hexane:EtOAc – 20:1) (**purification procedure A**) to give benzophenone **3j** as an off-white solid, 18 mg (98 %). m.p. = 43 – 44 °C (lit. 46 – 47 °C).<sup>17</sup> The analytical data are in accordance with previously published.<sup>19</sup>

<sup>1</sup>H NMR (400 MHz, CDCl<sub>3</sub>) δ 7.81 (d, *J* = 7.6 Hz, 4H), 7.59 (t, *J* = 7.6 Hz, 2H), 7.49 (t, *J* = 7.6 Hz, 4H).

<sup>13</sup>C NMR (101 MHz, CDCl<sub>3</sub>) δ 196.9, 137.7, 132.6, 130.2, 128.4.

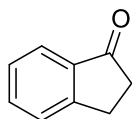

**3k:** according to **GP2** 2,3-dihydro-1*H*-inden-1-ol (0.1 mmol, 13.5 mg) reacted with iodane **2a** followed by column chromatography (gradient elution: hexane → hexane:EtOAc – 20:1) (**purification procedure A**) to give 2,3-dihydro-1*H*-inden-1-one **3k** as a yellowish solid, 7.5 mg (57 %). mp = 37 – 38 °C (lit. 37 – 39 °C).<sup>20</sup> The analytical data are in accordance with previously published.<sup>21</sup>

<sup>1</sup>H NMR (400 MHz, DMSO-*d*<sub>6</sub>) δ 7.66 – 7.63 (m, 2H), 7.59 (d, *J* = 7.6 Hz, 1H), 7.42 (t, *J* = 7.2 Hz, 1H), 3.10 (t, *J* = 5.6 Hz, 2H), 2.63 (t, *J* = 5.6 Hz, 2H).

<sup>13</sup>C NMR (100 MHz, DMSO-*d*<sub>6</sub>) δ 206.3, 155.3, 136.7, 134.6, 127.2, 127.0, 122.9, 35.8, 25.4.

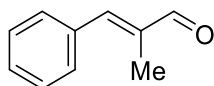

**3l:** according to **GP2** (*E*)-2-methyl-3-phenylprop-2-en-1-ol (0.1 mmol, 15 mg) reacted with iodane **2a** followed by column chromatography (PE:EtOAc – 30:1) (**purification procedure A**) to give (*E*)-2-methyl-3-phenylacrylaldehyde **3l** as a colorless liquid, 10.5 mg (71 %). The analytical data are in accordance with previously published.<sup>22</sup>

<sup>1</sup>H NMR (400 MHz, DMSO-*d*<sub>6</sub>) δ 9.58 (s, 1H), 7.63 (d, *J* = 7.6 Hz, 2H), 7.52 – 7.43 (m, 4H), 1.98 (s, 3H).

<sup>13</sup>C NMR (100 MHz, DMSO-*d*<sub>6</sub>) δ 195.7, 149.7, 137.5, 134.9, 130.1, 129.7, 128.8, 10.6.

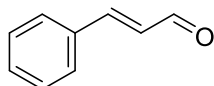

**3m:** according to **GP3** cinnamyl alcohol (0.1 mmol, 14 mg) reacted with iodane **2a** in the presence of Ac<sub>2</sub>O to give cinnamaldehyde **3m**, NMR yield: > 99 %.

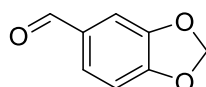

**3n:** according to **GP2** benzo[*d*][1,3]dioxol-5-ylmethanol (0.1 mmol, 15 mg) reacted with iodane **2a** and after **purification procedure B** gave benzo[*d*][1,3]dioxole-5-carbaldehyde **3n** as a yellow oil, 7 mg (47 %). The analytical data are in accordance with previously published.<sup>23</sup>

$^1\text{H}$  NMR (400 MHz,  $\text{CDCl}_3$ )  $\delta$  9.81 (s, 1H), 7.42 (d,  $J = 8.0$  Hz, 1H), 7.34 (s, 1H), 6.93 (d,  $J = 8.0$  Hz, 1H), 6.08 (s, 2H).

$^{13}\text{C}$  NMR (100 MHz,  $\text{CDCl}_3$ )  $\delta$  190.4, 153.3, 148.9, 132.1, 128.8, 108.5, 107.1, 102.3.

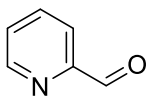

**3o**: according to **GP3** (pyridin-2-yl)methanol (0.1 mmol, 11 mg) reacted with iodane **2a** in the presence of TFA to give picolinaldehyde **3o**, NMR yield: 57 %.

#### Synthesis of nicotinaldehyde **3p**.

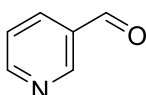

**3p**: 1-(2-iodophenyl)-1*H*-indazole **2a** (0.13 mmol, 46 mg) was charged in a reaction vessel and DCM (1 mL) was added. TFA (0.39 mmol, 30  $\mu\text{L}$ ) was added and the mixture was allowed to stir at room temperature for 30 min following by addition of the (pyridin-3-yl)methanol (0.1 mmol, 11 mg) as DCM (1 mL) solution. The reaction vessel was capped and the reaction was stirred for 24 h at room temperature. Then solvent was removed under reduced pressure and the residue was purified *via* column chromatography on silica (gradient elution DCM  $\rightarrow$  DCM:MeOH – 20:1 ) to give nicotinaldehyde **3p** as a brownish liquid, 8.5 mg (78 %). The analytical data are in accordance with previously published.<sup>24</sup>

$^1\text{H}$  NMR (600 MHz,  $\text{CDCl}_3$ )  $\delta$  10.12 (s, 1H), 9.09 (s, 1H), 8.85 (s, 1H), 8.18 (d,  $J = 7.8$  Hz, 1H), 7.50 – 7.48 (m, 1H).

$^{13}\text{C}$  NMR (150 MHz,  $\text{CDCl}_3$ )  $\delta$  190.9, 154.9, 152.3, 135.9, 131.6, 124.3.

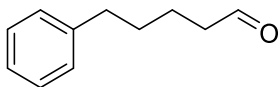

**3q**: according to **GP3** 5-phenylpentan-1-ol (0.1 mmol, 16 mg) reacted with iodane **2a** in the presence of  $\text{Ac}_2\text{O}$  to give 5-phenylpentanal **3q**, NMR yield: 40 %.

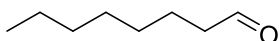

**3r**: according to **GP3** octan-1-ol (0.1 mmol, 13 mg) reacted with iodane **2a** in the presence of  $\text{Ac}_2\text{O}$  to give octanal **3r**, NMR yield: 31 %.

## 5. Additional experiments

### Oxidation with an open vessel

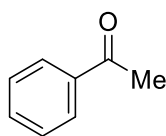

**3i**: 1-(2-iodophenyl)-1*H*-indazole **2a** (0.13 mmol, 46 mg) was charged in a reaction vessel and  $\text{CDCl}_3$  (1 mL) was added.  $\text{Ac}_2\text{O}$  (0.39 mmol, 36.6  $\mu\text{L}$ ) was added and the mixture was allowed to stir at room temperature for 30 min following by addition of the 1-phenylethanol (0.1 mmol, 12 mg) as  $\text{CDCl}_3$  (1 mL) solution. The reaction vessel was capped, pierced with a needle and the reaction was stirred for 24 h at room temperature to give acetophenone **3i**. After than the 1,2-dibromoethane was added as an internal standard, sample of approx. 0.5 mL was transferred to the NMR tube and the  $^1\text{H}$  NMR spectrum was recorded to determine the yield. NMR yield: 96 %.

### Supplementary note 2

We observed full dissolution of the starting materials after approx. 4 h after the start of the reaction. After 24 h there were a small amount of the precipitate (Fig.2), presumably iodane **2a** after the hydrolysis of *in situ* formed diacetate **2a'**. It seems that the rate of hydrolysis was lower under given conditions than the rate of alcohol oxidation since the moisture from air did not change the yield substantially. Thus, we believe that deviation between the yield of **3i** in the optimization table (Table 1, entry 10) is a little higher compared to the one in the comparison experiment (Fig. 2 in the main text) due to the fact that samples in the first several hours contained unreacted iodane **2a** in solid form.

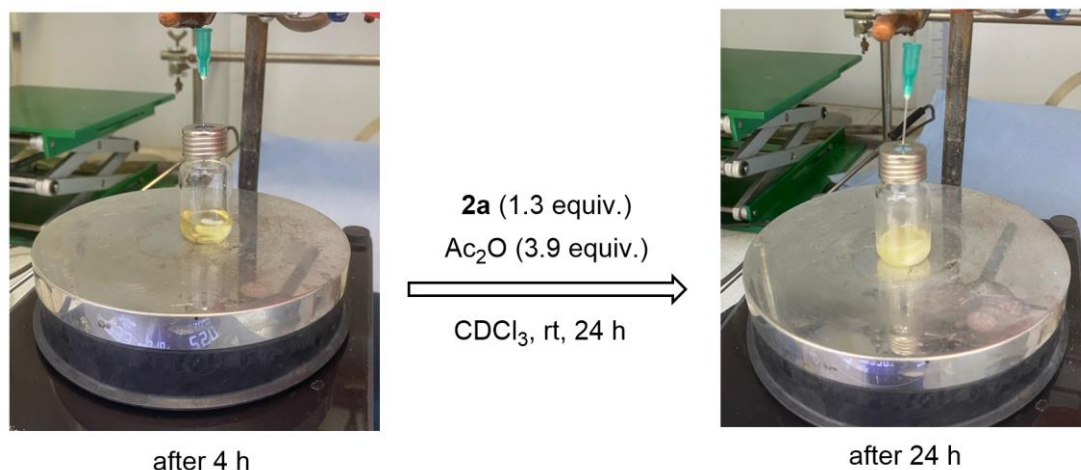

**Figure 2.** Preparation of acetophenone **3i** in the vessel opened to air

### Preparation of methyl phenyl sulfoxide

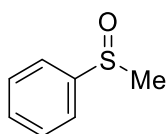

**4**: 1-(2-iodophenyl)-1*H*-indazole **2a** (0.11 mmol, 39 mg) was charged in a reaction vessel and MeCN (1 mL) was added. Thioanisole (0.1 mmol, 11.7  $\mu\text{L}$ ) was added neat. The reaction vessel was capped, placed in the preheated aluminium block and stirred for 10 h. Solvent was removed under reduced pressure and the residue was purified via column on silica (eluent: DCM:MeOH – 20:1) to give methyl phenyl sulfoxide **4** as a slightly yellow oil (freezes in a refrigerator), 10.4 mg (75 %). The analytical data are in accordance with previously published.<sup>25</sup>

$^1\text{H}$  NMR (400 MHz,  $\text{CDCl}_3$ )  $\delta$  7.65 (d,  $J$  = 7.2 Hz, 2H), 7.54 – 7.48 (m, 3H), 2.72 (s, 3H).

$^{13}\text{C}$  NMR (100 MHz,  $\text{CDCl}_3$ )  $\delta$  145.8, 131.2, 129.5, 123.6, 44.1.

**$\alpha,\beta$  – Dehydrogenation of carbonyl compounds (unsuccessful experiments)**

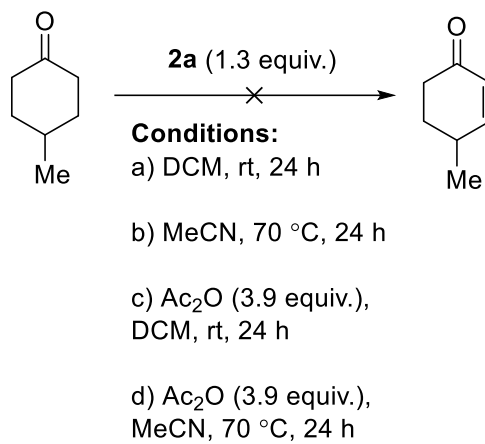

**Figure 3.** Conditions for the unsuccessful experiments on dehydrogenation of 4-methylcyclohexanone

## 6. Thermal analysis plots

a) **IBX** (rt to 238°C, 10 °C/min; air atmosphere)

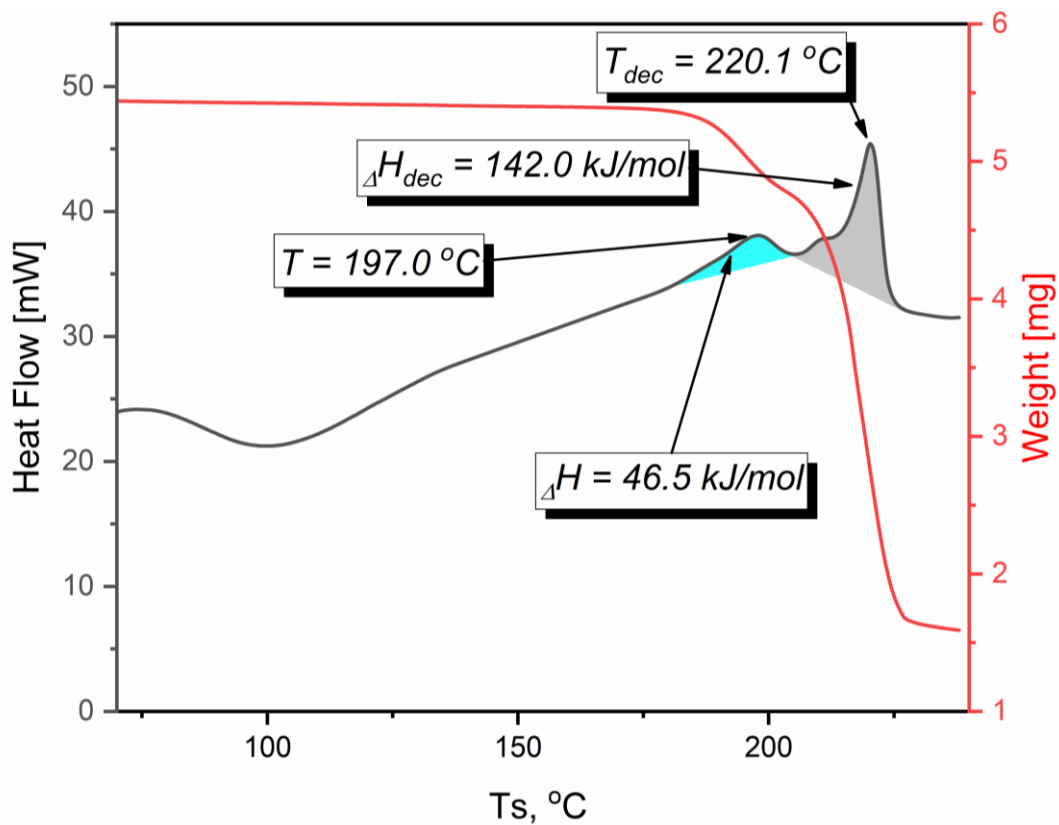

b) **Iodane 2a** (rt to 225 °C; 10 °C/min; air atmosphere)

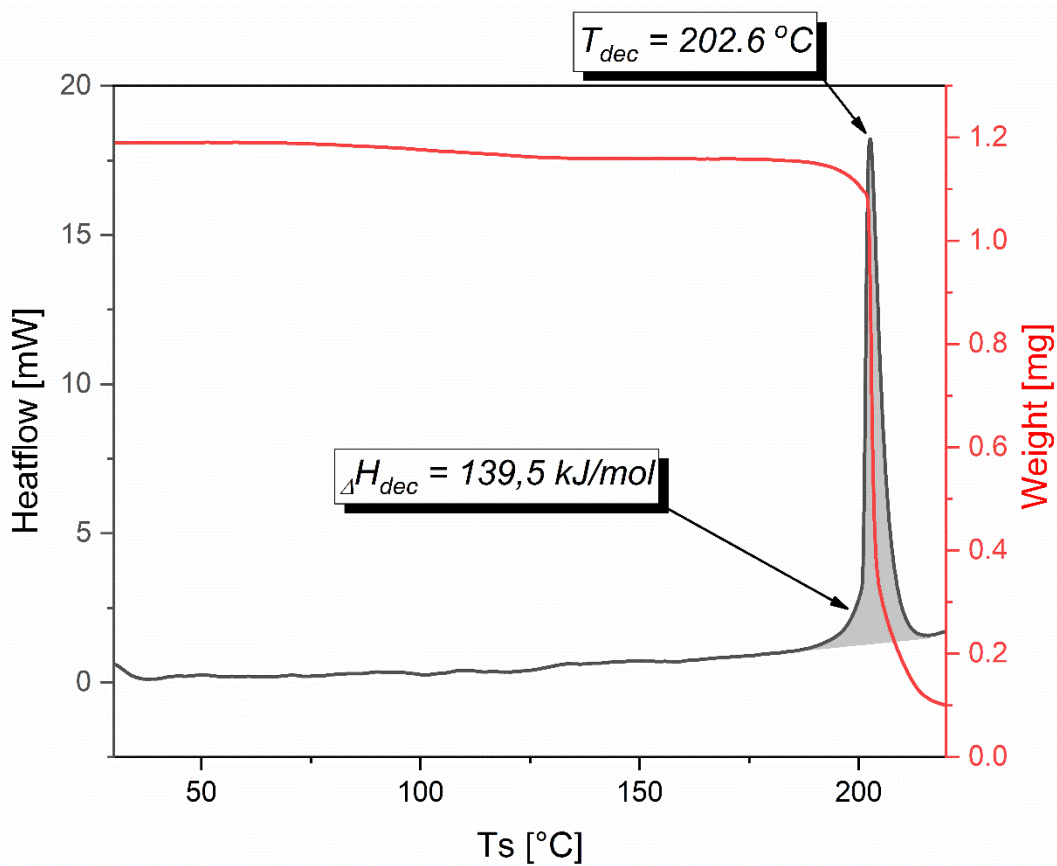

c) **Iodane 2b** (rt to 225 °C; 10 °C/min; air atmosphere).

**Integration was done for half of the peak and then doubled due to explosion at the temperature where the plot ends.**

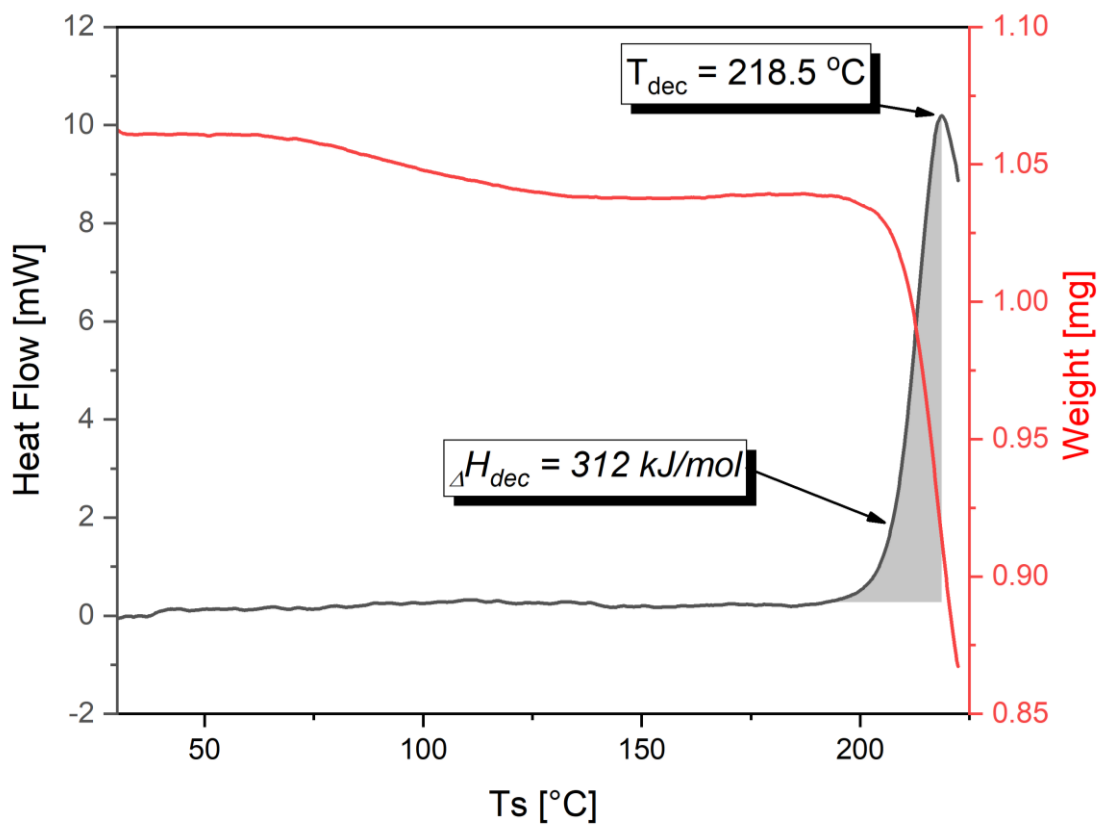



## 7. Crystal data

2a (CCDC 2364396). Crystal was grown by slow evaporation of AcOH:H<sub>2</sub>O – 3:2 solution of 2a.

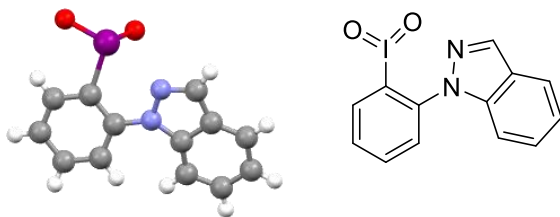

**Table 2 Crystal data and structure refinement for 2a.**

|                                    |                                                               |
|------------------------------------|---------------------------------------------------------------|
| Empirical formula                  | C <sub>13</sub> H <sub>9</sub> N <sub>2</sub> O <sub>2</sub>  |
| Formula weight                     | 352.12                                                        |
| Temperature/K                      | 100.00                                                        |
| Crystal system                     | monoclinic                                                    |
| Space group                        | P2 <sub>1</sub> /c                                            |
| a/Å                                | 6.5622(6)                                                     |
| b/Å                                | 11.6742(8)                                                    |
| c/Å                                | 15.1234(11)                                                   |
| α/°                                | 90                                                            |
| β/°                                | 92.555(3)                                                     |
| γ/°                                | 90                                                            |
| Volume/Å <sup>3</sup>              | 1157.43(16)                                                   |
| Z                                  | 4                                                             |
| ρ <sub>calc</sub> /cm <sup>3</sup> | 2.021                                                         |
| μ/mm <sup>-1</sup>                 | 2.761                                                         |
| F(000)                             | 680.0                                                         |
| Crystal size/mm <sup>3</sup>       | 0.6 × 0.11 × 0.1                                              |
| Radiation                          | MoKα (λ = 0.71073)                                            |
| 2θ range for data collection/°     | 6.214 to 72.702                                               |
| Index ranges                       | -10 ≤ h ≤ 10, -19 ≤ k ≤ 19, -25 ≤ l ≤ 20                      |
| Reflections collected              | 33426                                                         |
| Independent reflections            | 5599 [R <sub>int</sub> = 0.0342, R <sub>sigma</sub> = 0.0235] |
| Data/restraints/parameters         | 5599/0/163                                                    |
| Goodness-of-fit on F <sup>2</sup>  | 1.049                                                         |

Final R indexes [ $l \geq 2\sigma(l)$ ]  $R_1 = 0.0185$ ,  $wR_2 = 0.0411$

Final R indexes [all data]  $R_1 = 0.0216$ ,  $wR_2 = 0.0424$

Largest diff. peak/hole /  $e \text{ \AA}^{-3}$  0.62/-0.54

**Table 3 Fractional Atomic Coordinates ( $\times 10^4$ ) and Equivalent Isotropic Displacement Parameters ( $\text{\AA}^2 \times 10^3$ ) for 2a.  $U_{eq}$  is defined as 1/3 of the trace of the orthogonalised  $U_{ij}$  tensor.**

| Atom | x           | y          | z         | U(eq)     |
|------|-------------|------------|-----------|-----------|
| I1   | 2501.8(2)   | 5349.7(2)  | 4532.8(2) | 9.67(2)   |
| O1   | 1143.9(14)  | 5924.2(8)  | 5452.7(6) | 14.79(16) |
| O2   | 4851.9(14)  | 6152.5(8)  | 4654.5(6) | 14.92(16) |
| N2   | 4125.2(16)  | 4988.3(10) | 2984.6(7) | 13.13(17) |
| N1   | 3411.3(16)  | 5823.5(9)  | 2416.8(7) | 11.50(16) |
| C5   | 563.5(19)   | 7109.7(11) | 2052.1(8) | 13.7(2)   |
| C6   | 1681.8(17)  | 6437.1(10) | 2663.3(7) | 10.67(18) |
| C1   | 1021.8(18)  | 6370.4(10) | 3533.1(7) | 11.03(18) |
| C13  | 5752(2)     | 4534.8(11) | 2643.8(9) | 14.5(2)   |
| C4   | -1151(2)    | 7697.7(11) | 2307.2(8) | 15.5(2)   |
| C3   | -1803.0(19) | 7627.3(12) | 3169.5(9) | 15.9(2)   |
| C12  | 6143.6(19)  | 5054.8(11) | 1818.7(8) | 13.6(2)   |
| C7   | 4623.9(18)  | 5903.5(10) | 1693.4(8) | 11.54(18) |
| C2   | -708.4(19)  | 6951.1(11) | 3781.2(8) | 13.7(2)   |
| C9   | 6076(2)     | 6459.1(12) | 350.4(9)  | 17.3(2)   |
| C10  | 7550(2)     | 5590.9(13) | 451.9(9)  | 20.3(3)   |
| C11  | 7619(2)     | 4888.4(12) | 1186.5(9) | 18.2(2)   |
| C8   | 4599.8(19)  | 6638.2(11) | 958.7(8)  | 14.5(2)   |

**Table 4 Anisotropic Displacement Parameters ( $\text{\AA}^2 \times 10^3$ ) for 2a. The Anisotropic displacement factor exponent takes the form:  $-2\pi^2[h^2a^*U_{11}+2hka^*b^*U_{12}+\dots]$ .**

| Atom | $U_{11}$ | $U_{22}$ | $U_{33}$ | $U_{23}$ | $U_{13}$ | $U_{12}$ |
|------|----------|----------|----------|----------|----------|----------|
| I1   | 8.87(3)  | 11.16(3) | 8.97(3)  | 1.10(2)  | 0.23(2)  | -1.32(2) |
| O1   | 15.5(4)  | 18.4(4)  | 10.6(3)  | -2.0(3)  | 2.4(3)   | -1.0(3)  |
| O2   | 11.1(4)  | 13.9(4)  | 19.6(4)  | 1.9(3)   | -1.6(3)  | -4.5(3)  |

**Table 4 Anisotropic Displacement Parameters ( $\text{\AA}^2 \times 10^3$ ) for 2a. The Anisotropic displacement factor exponent takes the form:  $-2\pi^2[h^2a^*U_{11}+2hka^*b^*U_{12}+\dots]$ .**

| Atom | $U_{11}$ | $U_{22}$ | $U_{33}$ | $U_{23}$ | $U_{13}$ | $U_{12}$ |
|------|----------|----------|----------|----------|----------|----------|
| N2   | 12.7(4)  | 13.3(4)  | 13.5(4)  | 3.5(3)   | 1.6(3)   | 2.3(3)   |
| N1   | 11.9(4)  | 11.9(4)  | 11.0(4)  | 2.3(3)   | 2.8(3)   | 2.4(3)   |
| C5   | 13.4(5)  | 16.1(5)  | 11.5(5)  | 2.3(4)   | 1.2(4)   | 1.9(4)   |
| C6   | 9.0(4)   | 11.6(4)  | 11.4(4)  | 0.1(3)   | 1.2(3)   | -0.1(3)  |
| C1   | 10.7(4)  | 11.7(5)  | 10.7(4)  | 1.1(3)   | 1.1(3)   | 0.0(3)   |
| C13  | 14.1(5)  | 13.8(5)  | 15.8(5)  | 2.4(4)   | 3.1(4)   | 3.1(4)   |
| C4   | 14.3(5)  | 17.6(5)  | 14.7(5)  | 3.8(4)   | 0.8(4)   | 4.3(4)   |
| C3   | 13.5(5)  | 18.2(6)  | 16.1(5)  | 1.9(4)   | 3.6(4)   | 5.1(4)   |
| C12  | 12.4(5)  | 12.5(5)  | 16.1(5)  | 0.7(4)   | 2.9(4)   | 1.7(4)   |
| C7   | 11.7(5)  | 11.9(5)  | 11.2(4)  | 0.1(3)   | 2.4(3)   | 1.1(4)   |
| C2   | 13.2(5)  | 15.7(5)  | 12.5(5)  | 0.8(4)   | 3.4(4)   | 2.2(4)   |
| C9   | 18.1(6)  | 19.3(6)  | 15.2(5)  | 2.9(4)   | 7.0(4)   | 2.7(4)   |
| C10  | 20.7(6)  | 22.2(6)  | 18.7(6)  | 2.0(5)   | 9.4(5)   | 5.4(5)   |
| C11  | 16.1(6)  | 18.7(6)  | 20.4(6)  | 2.0(4)   | 6.9(4)   | 5.3(4)   |
| C8   | 15.3(5)  | 14.3(5)  | 14.1(5)  | 2.3(4)   | 3.9(4)   | 2.3(4)   |

**Table 5 Bond Lengths for 2a.**

| Atom | Atom | Length/ $\text{\AA}$ | Atom | Atom | Length/ $\text{\AA}$ |
|------|------|----------------------|------|------|----------------------|
| I1   | O1   | 1.8138(9)            | C1   | C2   | 1.3883(16)           |
| I1   | O2   | 1.8070(9)            | C13  | C12  | 1.4213(18)           |
| I1   | C1   | 2.1256(11)           | C4   | C3   | 1.3929(18)           |
| N2   | N1   | 1.3680(14)           | C3   | C2   | 1.3913(18)           |
| N2   | C13  | 1.3172(16)           | C12  | C7   | 1.4126(17)           |
| N1   | C6   | 1.4064(15)           | C12  | C11  | 1.4039(18)           |
| N1   | C7   | 1.3843(15)           | C7   | C8   | 1.4032(17)           |
| C5   | C6   | 1.3961(17)           | C9   | C10  | 1.4047(19)           |
| C5   | C4   | 1.3872(17)           | C9   | C8   | 1.3811(17)           |
| C6   | C1   | 1.4052(16)           | C10  | C11  | 1.380(2)             |

**Table 6 Bond Angles for 2a.**

| Atom | Atom | Atom | Angle/°    | Atom | Atom | Atom | Angle/°    |
|------|------|------|------------|------|------|------|------------|
| O1   | I1   | C1   | 96.53(4)   | N2   | C13  | C12  | 110.68(11) |
| O2   | I1   | O1   | 100.16(4)  | C5   | C4   | C3   | 121.20(11) |
| O2   | I1   | C1   | 98.19(4)   | C2   | C3   | C4   | 119.00(11) |
| C13  | N2   | N1   | 107.56(10) | C7   | C12  | C13  | 105.26(10) |
| N2   | N1   | C6   | 117.03(9)  | C11  | C12  | C13  | 134.09(12) |
| N2   | N1   | C7   | 110.57(9)  | C11  | C12  | C7   | 120.65(12) |
| C7   | N1   | C6   | 132.39(10) | N1   | C7   | C12  | 105.90(10) |
| C4   | C5   | C6   | 120.20(11) | N1   | C7   | C8   | 132.88(11) |
| C5   | C6   | N1   | 121.17(10) | C8   | C7   | C12  | 121.19(11) |
| C5   | C6   | C1   | 118.43(11) | C1   | C2   | C3   | 120.10(11) |
| C1   | C6   | N1   | 120.40(10) | C8   | C9   | C10  | 122.43(12) |
| C6   | C1   | I1   | 123.14(8)  | C11  | C10  | C9   | 120.97(12) |
| C2   | C1   | I1   | 115.77(8)  | C10  | C11  | C12  | 117.84(12) |
| C2   | C1   | C6   | 121.06(11) | C9   | C8   | C7   | 116.84(11) |

**Table 7 Torsion Angles for 2a.**

| A  | B   | C   | D   | Angle/°     | A   | B   | C   | D   | Angle/°     |
|----|-----|-----|-----|-------------|-----|-----|-----|-----|-------------|
| I1 | C1  | C2  | C3  | -178.98(10) | C13 | N2  | N1  | C6  | -178.97(11) |
| N2 | N1  | C6  | C5  | -165.06(11) | C13 | N2  | N1  | C7  | -0.06(14)   |
| N2 | N1  | C6  | C1  | 13.94(16)   | C13 | C12 | C7  | N1  | -1.61(14)   |
| N2 | N1  | C7  | C12 | 1.09(14)    | C13 | C12 | C7  | C8  | 176.65(12)  |
| N2 | N1  | C7  | C8  | -176.88(13) | C13 | C12 | C11 | C10 | -178.57(15) |
| N2 | C13 | C12 | C7  | 1.66(15)    | C4  | C5  | C6  | N1  | 179.28(12)  |
| N2 | C13 | C12 | C11 | -178.69(15) | C4  | C5  | C6  | C1  | 0.26(18)    |
| N1 | N2  | C13 | C12 | -1.01(15)   | C4  | C3  | C2  | C1  | 0.9(2)      |
| N1 | C6  | C1  | I1  | -0.77(16)   | C12 | C7  | C8  | C9  | 2.60(19)    |
| N1 | C6  | C1  | C2  | -178.57(11) | C7  | N1  | C6  | C5  | 16.3(2)     |
| N1 | C7  | C8  | C9  | -179.69(13) | C7  | N1  | C6  | C1  | -164.67(12) |
| C5 | C6  | C1  | I1  | 178.26(9)   | C7  | C12 | C11 | C10 | 1.0(2)      |

**Table 7 Torsion Angles for 2a.**

| A  | B  | C  | D   | Angle/°    | A   | B   | C   | D   | Angle/°    |
|----|----|----|-----|------------|-----|-----|-----|-----|------------|
| C5 | C6 | C1 | C2  | 0.46(18)   | C9  | C10 | C11 | C12 | 1.3(2)     |
| C5 | C4 | C3 | C2  | -0.1(2)    | C10 | C9  | C8  | C7  | -0.3(2)    |
| C6 | N1 | C7 | C12 | 179.77(12) | C11 | C12 | C7  | N1  | 178.69(12) |
| C6 | N1 | C7 | C8  | 1.8(2)     | C11 | C12 | C7  | C8  | -3.05(19)  |
| C6 | C5 | C4 | C3  | -0.4(2)    | C8  | C9  | C10 | C11 | -1.7(2)    |
| C6 | C1 | C2 | C3  | -1.03(19)  |     |     |     |     |            |

**Table 8 Hydrogen Atom Coordinates ( $\text{\AA} \times 10^4$ ) and Isotropic Displacement Parameters ( $\text{\AA}^2 \times 10^3$ ) for 2a.**

| Atom | x        | y       | z       | U(eq) |
|------|----------|---------|---------|-------|
| H5   | 977.96   | 7164.99 | 1459.73 | 16    |
| H13  | 6553.95  | 3941.55 | 2912.53 | 17    |
| H4   | -1893.6  | 8156.64 | 1886.17 | 19    |
| H3   | -2977.51 | 8035.01 | 3337.42 | 19    |
| H2   | -1145.65 | 6886.51 | 4369.54 | 16    |
| H9   | 6094.7   | 6940.9  | -155.41 | 21    |
| H10  | 8512.98  | 5485.83 | 8.41    | 24    |
| H11  | 8631.34  | 4310.85 | 1262.02 | 22    |
| H8   | 3614.99  | 7230.72 | 883.32  | 17    |

**2b (CCDC: 2364398).** Crystal was grown by slow evaporation of AcOH solution of 2b.

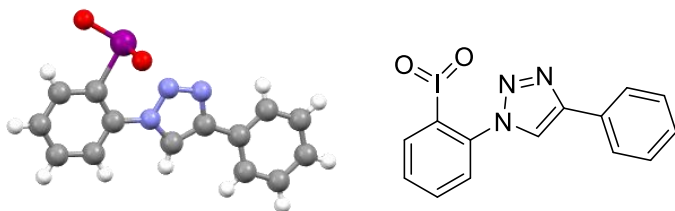**Table 9 Crystal data and structure refinement for 2b.**

|                   |                                                               |
|-------------------|---------------------------------------------------------------|
| Empirical formula | C <sub>14</sub> H <sub>10</sub> N <sub>3</sub> O <sub>2</sub> |
| Formula weight    | 379.15                                                        |
| Temperature/K     | 100.00                                                        |

|                                                |                                                               |
|------------------------------------------------|---------------------------------------------------------------|
| Crystal system                                 | trigonal                                                      |
| Space group                                    | R3c                                                           |
| a/Å                                            | 26.9537(8)                                                    |
| b/Å                                            | 26.9537(8)                                                    |
| c/Å                                            | 9.8807(5)                                                     |
| $\alpha/^\circ$                                | 90                                                            |
| $\beta/^\circ$                                 | 90                                                            |
| $\gamma/^\circ$                                | 120                                                           |
| Volume/Å <sup>3</sup>                          | 6216.6(5)                                                     |
| Z                                              | 18                                                            |
| $\rho_{\text{calc}}/\text{cm}^3$               | 1.823                                                         |
| $\mu/\text{mm}^{-1}$                           | 2.322                                                         |
| F(000)                                         | 3312.0                                                        |
| Crystal size/mm <sup>3</sup>                   | 0.11 × 0.04 × 0.03                                            |
| Radiation                                      | MoK $\alpha$ ( $\lambda = 0.71073$ )                          |
| 2 $\theta$ range for data collection/ $^\circ$ | 6.046 to 61.124                                               |
| Index ranges                                   | -38 ≤ h ≤ 38, -38 ≤ k ≤ 38, -14 ≤ l ≤ 14                      |
| Reflections collected                          | 64874                                                         |
| Independent reflections                        | 4233 [R <sub>int</sub> = 0.0626, R <sub>sigma</sub> = 0.0269] |
| Data/restraints/parameters                     | 4233/1/181                                                    |
| Goodness-of-fit on F <sup>2</sup>              | 1.086                                                         |
| Final R indexes [ $ I  \geq 2\sigma(I)$ ]      | R <sub>1</sub> = 0.0273, wR <sub>2</sub> = 0.0523             |
| Final R indexes [all data]                     | R <sub>1</sub> = 0.0290, wR <sub>2</sub> = 0.0528             |
| Largest diff. peak/hole / e Å <sup>-3</sup>    | 0.72/-1.02                                                    |
| Flack parameter                                | 0.003(9)                                                      |

**Table 10 Fractional Atomic Coordinates ( $\times 10^4$ ) and Equivalent Isotropic Displacement Parameters ( $\text{Å}^2 \times 10^3$ ) for 2b.  $U_{\text{eq}}$  is defined as 1/3 of the trace of the orthogonalised  $U_{ij}$  tensor.**

| Atom | x        | y         | z         | U(eq)    |
|------|----------|-----------|-----------|----------|
| I1   | 248.7(2) | 3243.1(2) | 3342.0(4) | 14.24(6) |

**Table 10 Fractional Atomic Coordinates ( $\times 10^4$ ) and Equivalent Isotropic Displacement Parameters ( $\text{\AA}^2 \times 10^3$ ) for 2b.  $U_{\text{eq}}$  is defined as 1/3 of the trace of the orthogonalised  $U_{ij}$  tensor.**

| Atom | x          | y          | z       | $U(\text{eq})$ |
|------|------------|------------|---------|----------------|
| O1   | 17.1(15)   | 2711.8(15) | 4698(3) | 18.2(7)        |
| N1   | 1598.5(17) | 3732.4(18) | 4332(4) | 18.0(8)        |
| O2   | -266.4(15) | 2815.9(15) | 2060(4) | 19.4(7)        |
| N2   | 1199.4(18) | 3853.9(19) | 4783(5) | 19.4(8)        |
| C4   | 1154(2)    | 2569(2)    | 1102(5) | 21.7(10)       |
| C7   | 2098(2)    | 4047(2)    | 5007(5) | 19.6(9)        |
| C5   | 1687(2)    | 2793(2)    | 1722(6) | 22.1(10)       |
| N3   | 1426.8(18) | 4239.6(19) | 5730(4) | 21.7(9)        |
| C2   | 907(2)     | 3099(2)    | 2645(5) | 17.0(9)        |
| C3   | 762(2)     | 2724(2)    | 1562(6) | 20.9(10)       |
| C8   | 1981(2)    | 4367(2)    | 5908(5) | 19.6(9)        |
| C6   | 1836(2)    | 3174(2)    | 2794(5) | 21.4(10)       |
| C1   | 1447(2)    | 3332(2)    | 3257(6) | 18.5(9)        |
| C10  | 2881(2)    | 4873(2)    | 7276(5) | 22.6(10)       |
| C14  | 2146(2)    | 5121(2)    | 7576(6) | 27.7(11)       |
| C9   | 2345(2)    | 4795(2)    | 6925(5) | 21.3(9)        |
| C11  | 3207(2)    | 5272(2)    | 8256(6) | 28.5(11)       |
| C13  | 2468(3)    | 5509(3)    | 8562(7) | 33.1(13)       |
| C12  | 3001(2)    | 5592(3)    | 8901(6) | 30.9(12)       |

**Table 11 Anisotropic Displacement Parameters ( $\text{\AA}^2 \times 10^3$ ) for 2b. The Anisotropic displacement factor exponent takes the form:  $-2\pi^2[h^2a^*U_{11}+2hka^*b^*U_{12}+\dots]$ .**

| Atom | $U_{11}$  | $U_{22}$  | $U_{33}$  | $U_{23}$ | $U_{13}$ | $U_{12}$ |
|------|-----------|-----------|-----------|----------|----------|----------|
| I1   | 13.17(12) | 15.20(13) | 13.58(10) | 0.70(11) | 0.02(10) | 6.51(11) |
| O1   | 20.6(17)  | 18.1(17)  | 16.7(19)  | 3.9(13)  | 2.3(13)  | 10.3(14) |
| N1   | 14.0(18)  | 17.7(19)  | 20(2)     | 0.1(15)  | -1.2(15) | 6.2(15)  |
| O2   | 15.7(16)  | 20.2(17)  | 18.9(17)  | -1.8(13) | -4.0(13) | 6.4(14)  |
| N2   | 14.7(18)  | 24(2)     | 19(2)     | -3.9(16) | -1.9(15) | 9.3(16)  |
| C4   | 21(2)     | 25(3)     | 20(2)     | -2.4(19) | 1.0(19)  | 12(2)    |

**Table 11 Anisotropic Displacement Parameters ( $\text{\AA}^2 \times 10^3$ ) for 2b. The Anisotropic displacement factor exponent takes the form:  $-2\pi^2[h^2a^*U_{11}+2hka^*b^*U_{12}+\dots]$ .**

| Atom | $U_{11}$ | $U_{22}$ | $U_{33}$ | $U_{23}$ | $U_{13}$ | $U_{12}$ |
|------|----------|----------|----------|----------|----------|----------|
| C7   | 16(2)    | 18(2)    | 22(2)    | -0.7(18) | -2.0(18) | 6.3(18)  |
| C5   | 19(2)    | 23(2)    | 27(3)    | 3(2)     | 7(2)     | 12(2)    |
| N3   | 19(2)    | 24(2)    | 22(2)    | -2.2(17) | -3.3(16) | 10.4(17) |
| C2   | 14(2)    | 19(2)    | 20(2)    | 4.4(18)  | 3.4(17)  | 9.4(18)  |
| C3   | 20(2)    | 21(2)    | 22(3)    | 1.0(19)  | -1.1(19) | 9(2)     |
| C8   | 16(2)    | 22(2)    | 22(2)    | 1.3(18)  | -0.9(18) | 9.7(19)  |
| C6   | 16(2)    | 21(2)    | 25(3)    | 1(2)     | -2(2)    | 8.0(19)  |
| C1   | 17(2)    | 18(2)    | 16(2)    | 2.4(17)  | -0.3(17) | 6.0(18)  |
| C10  | 20(2)    | 22(2)    | 26(3)    | -3(2)    | -1.4(19) | 10(2)    |
| C14  | 22(2)    | 26(3)    | 36(3)    | -8(2)    | -5(2)    | 13(2)    |
| C9   | 18(2)    | 19(2)    | 24(2)    | -2.1(19) | -3.2(19) | 7.5(19)  |
| C11  | 22(2)    | 32(3)    | 30(3)    | -6(2)    | -6(2)    | 12(2)    |
| C13  | 31(3)    | 25(3)    | 44(4)    | -11(2)   | -2(3)    | 14(2)    |
| C12  | 26(3)    | 29(3)    | 33(3)    | -12(2)   | -4(2)    | 10(2)    |

**Table 12 Bond Lengths for 2b.**

| Atom | Atom | Length/\AA | Atom | Atom | Length/\AA |
|------|------|------------|------|------|------------|
| I1   | O1   | 1.828(3)   | N3   | C8   | 1.365(6)   |
| I1   | O2   | 1.806(3)   | C2   | C3   | 1.388(7)   |
| I1   | C2   | 2.113(5)   | C2   | C1   | 1.400(7)   |
| N1   | N2   | 1.347(6)   | C8   | C9   | 1.473(7)   |
| N1   | C7   | 1.354(6)   | C6   | C1   | 1.392(7)   |
| N1   | C1   | 1.421(7)   | C10  | C9   | 1.394(7)   |
| N2   | N3   | 1.302(6)   | C10  | C11  | 1.386(7)   |
| C4   | C5   | 1.393(7)   | C14  | C9   | 1.397(7)   |
| C4   | C3   | 1.391(7)   | C14  | C13  | 1.373(8)   |
| C7   | C8   | 1.383(7)   | C11  | C12  | 1.389(8)   |
| C5   | C6   | 1.388(7)   | C13  | C12  | 1.382(8)   |



**Table 13 Bond Angles for 2b.**

| Atom Atom Atom Angle/° |    |    |           | Atom Atom Atom Angle/° |     |     |          |
|------------------------|----|----|-----------|------------------------|-----|-----|----------|
| O1                     | I1 | C2 | 94.83(17) | C7                     | C8  | C9  | 131.0(5) |
| O2                     | I1 | O1 | 99.34(16) | N3                     | C8  | C7  | 108.7(4) |
| O2                     | I1 | C2 | 95.92(18) | N3                     | C8  | C9  | 120.2(4) |
| N2                     | N1 | C7 | 110.4(4)  | C5                     | C6  | C1  | 119.6(5) |
| N2                     | N1 | C1 | 118.1(4)  | C2                     | C1  | N1  | 120.2(4) |
| C7                     | N1 | C1 | 131.5(4)  | C6                     | C1  | N1  | 120.2(4) |
| N3                     | N2 | N1 | 108.5(4)  | C6                     | C1  | C2  | 119.6(5) |
| C3                     | C4 | C5 | 120.0(5)  | C11                    | C10 | C9  | 119.9(5) |
| N1                     | C7 | C8 | 104.1(4)  | C13                    | C14 | C9  | 120.6(5) |
| C6                     | C5 | C4 | 120.7(5)  | C10                    | C9  | C8  | 121.6(5) |
| N2                     | N3 | C8 | 108.2(4)  | C10                    | C9  | C14 | 119.0(5) |
| C3                     | C2 | I1 | 115.4(4)  | C14                    | C9  | C8  | 119.3(5) |
| C3                     | C2 | C1 | 120.7(5)  | C10                    | C11 | C12 | 120.4(5) |
| C1                     | C2 | I1 | 123.8(4)  | C14                    | C13 | C12 | 120.4(5) |
| C2                     | C3 | C4 | 119.4(5)  | C13                    | C12 | C11 | 119.6(5) |

**Table 14 Torsion Angles for 2b.**

| A  | B  | C  | D  | Angle/°   | A   | B   | C   | D   | Angle/°   |
|----|----|----|----|-----------|-----|-----|-----|-----|-----------|
| I1 | C2 | C3 | C4 | -175.1(4) | C5  | C6  | C1  | N1  | -178.4(5) |
| I1 | C2 | C1 | N1 | -6.2(7)   | C5  | C6  | C1  | C2  | 0.7(8)    |
| I1 | C2 | C1 | C6 | 174.6(4)  | N3  | C8  | C9  | C10 | 170.2(5)  |
| N1 | N2 | N3 | C8 | -0.6(5)   | N3  | C8  | C9  | C14 | -8.3(7)   |
| N1 | C7 | C8 | N3 | -0.7(6)   | C3  | C4  | C5  | C6  | -0.4(8)   |
| N1 | C7 | C8 | C9 | -179.7(5) | C3  | C2  | C1  | N1  | 177.6(5)  |
| N2 | N1 | C7 | C8 | 0.4(5)    | C3  | C2  | C1  | C6  | -1.5(7)   |
| N2 | N1 | C1 | C2 | 3.6(7)    | C1  | N1  | N2  | N3  | -178.0(4) |
| N2 | N1 | C1 | C6 | -177.3(5) | C1  | N1  | C7  | C8  | 178.2(5)  |
| N2 | N3 | C8 | C7 | 0.8(6)    | C1  | C2  | C3  | C4  | 1.4(8)    |
| N2 | N3 | C8 | C9 | 179.9(5)  | C10 | C11 | C12 | C13 | 0.1(9)    |

**Table 14 Torsion Angles for 2b.**

| A  | B  | C  | D   | Angle/°   | A   | B   | C   | D   | Angle/°   |
|----|----|----|-----|-----------|-----|-----|-----|-----|-----------|
| C4 | C5 | C6 | C1  | 0.2(8)    | C14 | C13 | C12 | C11 | -1.3(10)  |
| C7 | N1 | N2 | N3  | 0.1(6)    | C9  | C10 | C11 | C12 | 0.6(9)    |
| C7 | N1 | C1 | C2  | -174.2(5) | C9  | C14 | C13 | C12 | 1.6(10)   |
| C7 | N1 | C1 | C6  | 5.0(8)    | C11 | C10 | C9  | C8  | -178.8(5) |
| C7 | C8 | C9 | C10 | -10.9(9)  | C11 | C10 | C9  | C14 | -0.3(8)   |
| C7 | C8 | C9 | C14 | 170.6(6)  | C13 | C14 | C9  | C8  | 177.7(5)  |
| C5 | C4 | C3 | C2  | -0.4(8)   | C13 | C14 | C9  | C10 | -0.8(9)   |

**Table 15 Hydrogen Atom Coordinates ( $\text{\AA} \times 10^4$ ) and Isotropic Displacement Parameters ( $\text{\AA}^2 \times 10^3$ ) for 2b.**

| Atom | x       | y       | z       | U(eq) |
|------|---------|---------|---------|-------|
| H4   | 1057.51 | 2310.43 | 364.65  | 26    |
| H7   | 2447.43 | 4047.03 | 4888.29 | 23    |
| H5   | 1952.4  | 2684.36 | 1407.6  | 27    |
| H3   | 398.9   | 2573.71 | 1138.68 | 25    |
| H6   | 2201.53 | 3326.3  | 3210.2  | 26    |
| H10  | 3022.03 | 4653.2  | 6845.73 | 27    |
| H14  | 1783.82 | 5074.76 | 7334.53 | 33    |
| H11  | 3573.44 | 5327.98 | 8488.48 | 34    |
| H13  | 2322.82 | 5720.72 | 9013.43 | 40    |
| H12  | 3226.45 | 5865.37 | 9570.23 | 37    |

**2a'** (CCDC: 2364397). Crystal was grown by cooling the reaction mixture to  $-30\text{ }^\circ\text{C}$  in a closed vial after the formation of **2a'** from **2a** (reaction below).

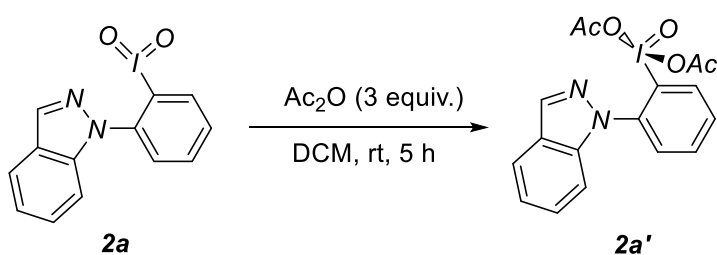

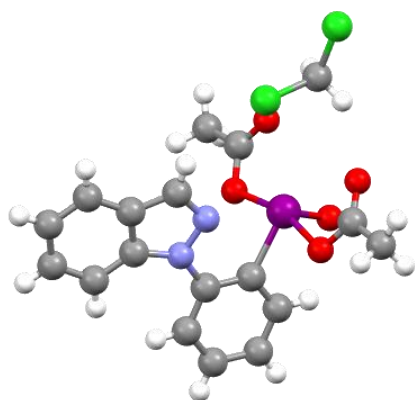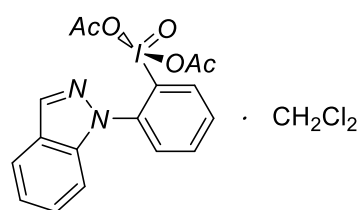

**Table 16 Crystal data and structure refinement for 2a'.**

|                                    |                                                                                |
|------------------------------------|--------------------------------------------------------------------------------|
| Empirical formula                  | C <sub>18</sub> H <sub>17</sub> Cl <sub>2</sub> IN <sub>2</sub> O <sub>5</sub> |
| Formula weight                     | 539.14                                                                         |
| Temperature/K                      | 100.00                                                                         |
| Crystal system                     | orthorhombic                                                                   |
| Space group                        | Pbca                                                                           |
| a/Å                                | 15.2341(4)                                                                     |
| b/Å                                | 14.6267(4)                                                                     |
| c/Å                                | 17.4417(5)                                                                     |
| α/°                                | 90                                                                             |
| β/°                                | 90                                                                             |
| γ/°                                | 90                                                                             |
| Volume/Å <sup>3</sup>              | 3886.44(18)                                                                    |
| Z                                  | 8                                                                              |
| ρ <sub>calc</sub> /cm <sup>3</sup> | 1.843                                                                          |
| μ/mm <sup>-1</sup>                 | 1.957                                                                          |
| F(000)                             | 2128.0                                                                         |
| Crystal size/mm <sup>3</sup>       | 0.121 × 0.117 × 0.113                                                          |
| Radiation                          | MoKα (λ = 0.71073)                                                             |
| 2θ range for data collection/°     | 5.348 to 72.688                                                                |
| Index ranges                       | -20 ≤ h ≤ 25, -15 ≤ k ≤ 24, -29 ≤ l ≤ 29                                       |
| Reflections collected              | 61224                                                                          |
| Independent reflections            | 9432 [R <sub>int</sub> = 0.0290, R <sub>sigma</sub> = 0.0194]                  |
| Data/restraints/parameters         | 9432/0/255                                                                     |

Goodness-of-fit on  $F^2$  1.119  
 Final R indexes [ $I > 2\sigma(I)$ ]  $R_1 = 0.0211$ ,  $wR_2 = 0.0460$   
 Final R indexes [all data]  $R_1 = 0.0239$ ,  $wR_2 = 0.0469$   
 Largest diff. peak/hole /  $e \text{ \AA}^{-3}$  0.54/-0.88

**Table 17 Fractional Atomic Coordinates ( $\times 10^4$ ) and Equivalent Isotropic Displacement Parameters ( $\text{\AA}^2 \times 10^3$ ) for  $2a'$ .  $U_{eq}$  is defined as 1/3 of the trace of the orthogonalised  $U_{ij}$  tensor.**

| Atom | x          | y         | z          | U(eq)     |
|------|------------|-----------|------------|-----------|
| I1   | 6286.4(2)  | 6100.8(2) | 7035.9(2)  | 9.00(2)   |
| C11  | 4414.0(2)  | 6244.5(2) | 8567.2(2)  | 19.52(5)  |
| C12  | 4818.3(2)  | 6243.0(3) | 10205.2(2) | 24.53(6)  |
| O1   | 7423.2(5)  | 6204.5(7) | 7245.4(5)  | 18.22(16) |
| O3   | 6297.2(6)  | 4880.6(6) | 8298.2(5)  | 20.10(17) |
| O2   | 6323.9(6)  | 4644.7(6) | 7036.2(5)  | 16.76(15) |
| O4   | 6188.8(6)  | 7488.3(5) | 6689.8(5)  | 14.50(14) |
| O5   | 6026.3(7)  | 7717.9(7) | 7946.1(5)  | 21.87(18) |
| N2   | 4714.8(6)  | 6016.7(6) | 6381.9(5)  | 11.54(14) |
| N1   | 4841.1(6)  | 6152.1(6) | 5611.4(5)  | 10.16(14) |
| C2   | 7243.7(7)  | 5733.9(7) | 5599.1(6)  | 12.77(17) |
| C14  | 6316.9(8)  | 4352.5(8) | 7753.3(7)  | 15.63(18) |
| C5   | 5875.1(7)  | 5937.1(7) | 4552.3(6)  | 11.96(16) |
| C13  | 3886.6(7)  | 6195.8(7) | 6531.2(6)  | 12.40(16) |
| C12  | 3435.2(7)  | 6458.2(7) | 5853.9(6)  | 10.61(15) |
| C11  | 2566.8(7)  | 6724.4(8) | 5704.9(6)  | 13.48(17) |
| C1   | 6398.1(6)  | 5914.6(7) | 5845.4(6)  | 10.05(15) |
| C8   | 3844.0(7)  | 6648.6(8) | 4507.6(6)  | 13.61(17) |
| C9   | 2984.8(7)  | 6904.3(8) | 4375.3(6)  | 15.99(18) |
| C6   | 5694.4(6)  | 6008.0(6) | 5333.9(5)  | 9.09(14)  |
| C16  | 6085.5(8)  | 8022.1(7) | 7295.8(7)  | 14.67(17) |
| C15  | 6342.8(10) | 3334.8(9) | 7837.7(8)  | 24.4(3)   |

**Table 17 Fractional Atomic Coordinates ( $\times 10^4$ ) and Equivalent Isotropic Displacement Parameters ( $\text{\AA}^2 \times 10^3$ ) for 2a'.  $U_{\text{eq}}$  is defined as 1/3 of the trace of the orthogonalised  $U_{ij}$  tensor.**

| Atom | x          | y         | z         | $U(\text{eq})$ |
|------|------------|-----------|-----------|----------------|
| C18  | 5244.5(8)  | 6359.9(9) | 9268.2(7) | 17.50(19)      |
| C3   | 7412.7(7)  | 5659.9(8) | 4819.3(6) | 13.81(17)      |
| C7   | 4066.0(6)  | 6422.4(7) | 5264.1(6) | 9.93(15)       |
| C4   | 6730.6(7)  | 5772.9(7) | 4303.2(6) | 13.18(17)      |
| C10  | 2350.2(7)  | 6940.7(8) | 4960.9(7) | 15.46(18)      |
| C17  | 6067.4(10) | 9023.5(8) | 7108.3(8) | 23.0(2)        |

**Table 18 Anisotropic Displacement Parameters ( $\text{\AA}^2 \times 10^3$ ) for 2a'. The Anisotropic displacement factor exponent takes the form:  $-2\pi^2[h^2a^2U_{11}+2hka^*b^*U_{12}+\dots]$ .**

| Atom | $U_{11}$  | $U_{22}$  | $U_{33}$  | $U_{23}$ | $U_{13}$ | $U_{12}$ |
|------|-----------|-----------|-----------|----------|----------|----------|
| I1   | 9.17(3)   | 10.86(3)  | 6.97(3)   | 0.00(2)  | -1.42(2) | -0.09(2) |
| Cl1  | 17.74(11) | 24.86(13) | 15.95(11) | -3.87(9) | -2.40(9) | -2.69(9) |
| Cl2  | 24.88(14) | 34.69(16) | 14.03(11) | 0.66(11) | 1.24(10) | 3.58(12) |
| O1   | 9.7(3)    | 28.8(4)   | 16.2(4)   | -1.6(3)  | -4.8(3)  | -1.2(3)  |
| O3   | 29.6(5)   | 19.5(4)   | 11.2(3)   | 0.6(3)   | -1.1(3)  | 6.0(3)   |
| O2   | 27.6(4)   | 12.7(3)   | 10.0(3)   | 1.1(3)   | -0.1(3)  | 2.4(3)   |
| O4   | 20.7(4)   | 11.3(3)   | 11.5(3)   | 0.2(2)   | 0.6(3)   | -1.5(3)  |
| O5   | 34.5(5)   | 18.4(4)   | 12.7(3)   | -2.6(3)  | -0.7(3)  | -1.8(4)  |
| N2   | 10.8(3)   | 16.6(4)   | 7.2(3)    | 0.4(3)   | 0.2(3)   | -0.2(3)  |
| N1   | 8.7(3)    | 14.3(3)   | 7.5(3)    | 0.7(3)   | 0.0(3)   | 0.1(3)   |
| C2   | 9.7(4)    | 16.2(4)   | 12.5(4)   | -0.7(3)  | 0.0(3)   | 0.9(3)   |
| C14  | 19.0(5)   | 15.2(4)   | 12.8(4)   | 2.7(3)   | 0.6(4)   | 4.4(4)   |
| C5   | 12.2(4)   | 15.0(4)   | 8.7(4)    | -0.1(3)  | 0.1(3)   | 0.9(3)   |
| C13  | 10.8(4)   | 16.7(4)   | 9.7(4)    | -0.3(3)  | 0.8(3)   | 0.0(3)   |
| C12  | 9.8(4)    | 11.4(4)   | 10.6(4)   | -0.5(3)  | 0.0(3)   | 0.2(3)   |
| C11  | 10.1(4)   | 15.3(4)   | 15.0(4)   | -0.5(3)  | -0.2(3)  | 1.8(3)   |
| C1   | 9.6(4)    | 12.0(4)   | 8.6(4)    | 0.1(3)   | -0.4(3)  | 0.1(3)   |
| C8   | 13.5(4)   | 17.6(4)   | 9.7(4)    | 1.9(3)   | -0.8(3)  | 2.4(3)   |
| C9   | 15.0(4)   | 19.7(5)   | 13.2(4)   | 2.0(4)   | -3.3(4)  | 3.1(4)   |

**Table 18 Anisotropic Displacement Parameters ( $\text{\AA}^2 \times 10^3$ ) for 2a'. The Anisotropic displacement factor exponent takes the form:  $-2\pi^2[h^2a^{*2}U_{11}+2hka^*b^*U_{12}+\dots]$ .**

| Atom | $U_{11}$ | $U_{22}$ | $U_{33}$ | $U_{23}$ | $U_{13}$ | $U_{12}$ |
|------|----------|----------|----------|----------|----------|----------|
| C6   | 9.1(3)   | 10.1(3)  | 8.1(3)   | 0.2(3)   | 0.2(3)   | -0.3(3)  |
| C16  | 16.4(4)  | 12.6(4)  | 15.0(4)  | -1.6(3)  | -2.7(4)  | -1.2(3)  |
| C15  | 37.7(7)  | 14.3(5)  | 21.3(5)  | 5.0(4)   | 3.7(5)   | 5.5(5)   |
| C18  | 14.1(4)  | 24.1(5)  | 14.3(4)  | -2.1(4)  | 0.0(4)   | -0.5(4)  |
| C3   | 11.4(4)  | 16.7(4)  | 13.3(4)  | -1.6(3)  | 2.9(3)   | 0.5(3)   |
| C7   | 9.4(4)   | 10.6(4)  | 9.7(4)   | -0.2(3)  | -1.4(3)  | 0.3(3)   |
| C4   | 13.8(4)  | 15.7(4)  | 10.1(4)  | -0.3(3)  | 2.7(3)   | 0.3(3)   |
| C10  | 12.0(4)  | 17.5(4)  | 17.0(4)  | 1.2(4)   | -2.2(4)  | 3.5(3)   |
| C17  | 34.9(7)  | 11.7(4)  | 22.3(5)  | -1.0(4)  | -7.5(5)  | -0.2(4)  |

**Table 19 Bond Lengths for 2a'.**

| Atom | Atom | Length/ $\text{\AA}$ | Atom | Atom | Length/ $\text{\AA}$ |
|------|------|----------------------|------|------|----------------------|
| I1   | O1   | 1.7765(8)            | C2   | C3   | 1.3885(15)           |
| I1   | O2   | 2.1306(9)            | C14  | C15  | 1.4963(18)           |
| I1   | O4   | 2.1226(8)            | C5   | C6   | 1.3946(14)           |
| I1   | C1   | 2.1011(10)           | C5   | C4   | 1.3946(15)           |
| Cl1  | C18  | 1.7675(12)           | C13  | C12  | 1.4198(15)           |
| Cl2  | C18  | 1.7669(12)           | C12  | C11  | 1.4032(14)           |
| O3   | C14  | 1.2252(15)           | C12  | C7   | 1.4087(14)           |
| O2   | C14  | 1.3217(14)           | C11  | C10  | 1.3759(16)           |
| O4   | C16  | 1.3234(14)           | C1   | C6   | 1.4014(14)           |
| O5   | C16  | 1.2217(14)           | C8   | C9   | 1.3806(15)           |
| N2   | N1   | 1.3720(12)           | C8   | C7   | 1.4016(14)           |
| N2   | C13  | 1.3146(14)           | C9   | C10  | 1.4075(16)           |
| N1   | C6   | 1.4030(13)           | C16  | C17  | 1.5011(16)           |
| N1   | C7   | 1.3848(13)           | C3   | C4   | 1.3847(15)           |
| C2   | C1   | 1.3834(14)           |      |      |                      |

**Table 20 Bond Angles for 2a'.**

| Atom | Atom | Atom | Angle/°    | Atom | Atom | Atom | Angle/°    |
|------|------|------|------------|------|------|------|------------|
| O1   | I1   | O2   | 93.39(4)   | C7   | C12  | C13  | 105.49(9)  |
| O1   | I1   | O4   | 92.59(4)   | C10  | C11  | C12  | 117.69(10) |
| O1   | I1   | C1   | 97.78(4)   | C2   | C1   | I1   | 114.02(7)  |
| O4   | I1   | O2   | 163.29(3)  | C2   | C1   | C6   | 122.23(9)  |
| C1   | I1   | O2   | 82.44(3)   | C6   | C1   | I1   | 123.68(7)  |
| C1   | I1   | O4   | 81.29(4)   | C9   | C8   | C7   | 116.75(10) |
| C14  | O2   | I1   | 108.86(7)  | C8   | C9   | C10  | 122.69(10) |
| C16  | O4   | I1   | 110.20(7)  | C5   | C6   | N1   | 122.09(9)  |
| C13  | N2   | N1   | 107.45(9)  | C5   | C6   | C1   | 117.65(9)  |
| N2   | N1   | C6   | 116.50(8)  | C1   | C6   | N1   | 120.25(9)  |
| N2   | N1   | C7   | 110.49(8)  | O4   | C16  | C17  | 113.82(10) |
| C7   | N1   | C6   | 133.01(9)  | O5   | C16  | O4   | 122.37(10) |
| C1   | C2   | C3   | 119.45(10) | O5   | C16  | C17  | 123.80(11) |
| O3   | C14  | O2   | 122.03(11) | Cl2  | C18  | Cl1  | 111.56(6)  |
| O3   | C14  | C15  | 123.47(11) | C4   | C3   | C2   | 119.23(10) |
| O2   | C14  | C15  | 114.49(10) | N1   | C7   | C12  | 105.83(8)  |
| C6   | C5   | C4   | 120.12(9)  | N1   | C7   | C8   | 133.23(9)  |
| N2   | C13  | C12  | 110.73(9)  | C8   | C7   | C12  | 120.93(9)  |
| C11  | C12  | C13  | 133.29(10) | C3   | C4   | C5   | 121.29(10) |
| C11  | C12  | C7   | 121.21(9)  | C11  | C10  | C9   | 120.73(10) |

**Table 21 Torsion Angles for 2a'.**

| A  | B  | C   | D   | Angle/°    | A   | B   | C   | D   | Angle/°     |
|----|----|-----|-----|------------|-----|-----|-----|-----|-------------|
| I1 | O2 | C14 | O3  | -0.42(14)  | C13 | C12 | C7  | C8  | -179.60(10) |
| I1 | O2 | C14 | C15 | -179.91(9) | C12 | C11 | C10 | C9  | -0.72(17)   |
| I1 | O4 | C16 | O5  | -2.48(14)  | C11 | C12 | C7  | N1  | 179.05(9)   |
| I1 | O4 | C16 | C17 | 176.34(9)  | C11 | C12 | C7  | C8  | -0.27(15)   |
| I1 | C1 | C6  | N1  | -6.06(13)  | C1  | C2  | C3  | C4  | 0.28(16)    |
| I1 | C1 | C6  | C5  | 174.98(7)  | C8  | C9  | C10 | C11 | 0.45(18)    |

**Table 21 Torsion Angles for 2a'.**

| A   | B   | C   | D   | Angle/°     | A  | B   | C   | D   | Angle/°     |
|-----|-----|-----|-----|-------------|----|-----|-----|-----|-------------|
| N2  | N1  | C6  | C5  | 166.55(9)   | C9 | C8  | C7  | N1  | -179.13(11) |
| N2  | N1  | C6  | C1  | -12.36(13)  | C9 | C8  | C7  | C12 | -0.02(16)   |
| N2  | N1  | C7  | C12 | 0.30(11)    | C6 | N1  | C7  | C12 | -178.89(10) |
| N2  | N1  | C7  | C8  | 179.51(11)  | C6 | N1  | C7  | C8  | 0.32(19)    |
| N2  | C13 | C12 | C11 | -179.05(11) | C6 | C5  | C4  | C3  | 1.23(16)    |
| N2  | C13 | C12 | C7  | 0.17(12)    | C3 | C2  | C1  | I1  | -175.61(8)  |
| N1  | N2  | C13 | C12 | 0.02(12)    | C3 | C2  | C1  | C6  | 1.38(16)    |
| C2  | C1  | C6  | N1  | 177.24(9)   | C7 | N1  | C6  | C5  | -14.29(17)  |
| C2  | C1  | C6  | C5  | -1.71(15)   | C7 | N1  | C6  | C1  | 166.80(10)  |
| C2  | C3  | C4  | C5  | -1.58(17)   | C7 | C12 | C11 | C10 | 0.64(16)    |
| C13 | N2  | N1  | C6  | 179.14(9)   | C7 | C8  | C9  | C10 | -0.06(17)   |
| C13 | N2  | N1  | C7  | -0.20(12)   | C4 | C5  | C6  | N1  | -178.53(9)  |
| C13 | C12 | C11 | C10 | 179.76(11)  | C4 | C5  | C6  | C1  | 0.40(15)    |
| C13 | C12 | C7  | N1  | -0.28(11)   |    |     |     |     |             |

**Table 22 Hydrogen Atom Coordinates ( $\text{\AA} \times 10^4$ ) and Isotropic Displacement Parameters ( $\text{\AA}^2 \times 10^3$ ) for 2a'.**

| Atom | x       | y       | z       | U(eq) |
|------|---------|---------|---------|-------|
| H2   | 7704.96 | 5660.93 | 5960.55 | 15    |
| H5   | 5414.62 | 6000.76 | 4188.97 | 14    |
| H13  | 3625.84 | 6155.12 | 7024.77 | 15    |
| H11  | 2143.31 | 6754.31 | 6103.92 | 16    |
| H8   | 4264.18 | 6627.04 | 4105.59 | 16    |
| H9   | 2815.11 | 7062.07 | 3868.16 | 19    |
| H15A | 6939.53 | 3114.99 | 7737.39 | 37    |
| H15B | 5936.01 | 3055.78 | 7470.67 | 37    |
| H15C | 6169.84 | 3167.17 | 8360.29 | 37    |
| H18A | 5700.36 | 5888.54 | 9182.14 | 21    |
| H18B | 5524.83 | 6967.32 | 9215.87 | 21    |
| H3   | 7989.6  | 5533.32 | 4641.87 | 17    |



**Table 22 Hydrogen Atom Coordinates ( $\text{\AA}\times 10^4$ ) and Isotropic Displacement Parameters ( $\text{\AA}^2\times 10^3$ ) for 2a'.**

| <b>Atom</b> | <b>x</b> | <b>y</b> | <b>z</b> | <b>U(eq)</b> |
|-------------|----------|----------|----------|--------------|
| H4          | 6847.61  | 5737.91  | 3769.05  | 16           |
| H10         | 1765.74  | 7116.62  | 4841.14  | 19           |
| H17A        | 6668.52  | 9243.57  | 7030.92  | 34           |
| H17B        | 5795.96  | 9360.02  | 7532.41  | 34           |
| H17C        | 5725.93  | 9120.84  | 6639.17  | 34           |

## References

- [1] W. L. Armarego, C. L. L. Chai, *Purification of Laboratory Chemicals* (6th Edition), Elsevier Inc., London, 2009.
- [2] L. Krause, R. Herbst-Irmer, G. M. Sheldrick, D. Stalke, *J. Appl. Crystallogr.* **2015**, *48*, 310.
- [3] G. M. Sheldrick, *Acta Crystallogr. Sect. A Found. Crystallogr.* **2008**, *64*, 112 – 122.
- [4] G. M. Sheldrick, *Acta Crystallogr. Sect. A Found. Crystallogr.* **2015**, *71*, 3 – 8.
- [5] M. Frigerio, M. Santagostino, S. Sputore, *J. Org. Chem.* **1999**, *64*, 4537 – 4538.
- [6] G. T. Giuffredi, S. Purser, M. Sawicki, A. L. Thompson, V. Gouverneur, *Tetrahedron: Asymmetry* **2009**, *20*, 910 – 920.
- [7] A. Boelke, E. Lork, B. J. Nachtsheim, *Chem. - Eur. J.* **2018**, *24*, 18653 – 18657.
- [8] D. Wang, N. Li, M. Zhao, W. Shi, C. Maab, B. Chen, *Green Chem.* **2010**, *12*, 2120 – 2123.
- [9] B. Liu, L. Cheng, P. Hu, F. Xu, D. Li, W.-J. Gua, W. Han, *Chem. Commun.* **2019**, *55*, 4817 – 4820.
- [10] S. Tripathi, S. N. Singha, L. D. S. Yadav, *RSC Adv.* **2016**, *6*, 14547 – 14551.
- [11] M. Guan, C. Wang, J. Zhang, Y. Zhao, *RSC Adv.* **2014**, *4*, 48777 – 48782.
- [12] X. Liu, Q. Xia, Y. Zhang, C. Chen, W. Chen, *J. Org. Chem.* **2013**, *78*, 8531 – 8536.
- [13] Z. Zhou, M. Liu, C.-J. Li, *ACS Catal.* **2017**, *7*, 3344 – 3348.
- [14] H. Keypour, S. G. Saremi, H. Veisib, R. Azadbakht, *RSC Adv.* **2016**, *6*, 77020 – 77029.
- [15] X.-F. Wu, J. Schranck, H. Neumann, M. Beller, *Chem. Commun.* **2011**, *47*, 12462 – 12463.
- [16] N. Jiang, A. J. Ragauskas, *J. Org. Chem.* **2006**, *71*, 7087 – 7090.
- [17] W. J. Ang, Y. S. Chnga, Y. Lam, *RSC Adv.* **2015**, *5*, 81415 – 81428.
- [18] G. Barker, S. Webster, D. G. Johnson, R. Curley, M. Andrews, P. C. Young, S. A. Macgregor, A.-L. Lee, *J. Org. Chem.* **2015**, *80*, 9807 – 9816.
- [19] T. Huang, T. Chen, L.-B. Han, *J. Org. Chem.* **2018**, *83*, 2959 – 2965.
- [20] B. R. Kim, H.-G. Lee, E. J. Kim, S.-G. Lee, Y.-J. Yoon, *J. Org. Chem.* **2010**, *75*, 484 – 486.
- [21] K.-J. Liu, S. Jiang, L.-H. Lu, L.-L. Tang, S.-S. Tang, H.-S. Tang, Z. Tang, W.-M. He, X. Xu, *Green Chem.* **2018**, *20*, 3038 – 3043.
- [22] C. B. Kelly, J. M. Ovian, R. M. Cywar, T. R. Gosselin, R. J. Wiles, N. E. Leadbeater, *Org. Biomol. Chem.* **2015**, *13*, 4255 – 4259.
- [23] R. Haraguchi, S. Tanazawa, N. Tokunaga, S. Fukuzawa, *Org. Lett.* **2017**, *19*, 1646 – 1649.
- [24] R. Prebil, G. Stavber, S. Stavber, *Eur. J. Org. Chem.* **2014**, 395 – 402.
- [25] I. Bassanini, E. E. Ferrandi, M. Vanoni, G. Ottolina, S. Riva, M. Crotti, E. Brenna, D. Monti, *Eur. J. Org. Chem.* **2017**, 7186 – 7189.

# ***Spectral data***

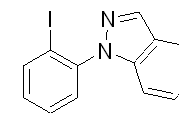

**1a**,  $^1\text{H}$  NMR  
400 MHz,  $\text{CDCl}_3$

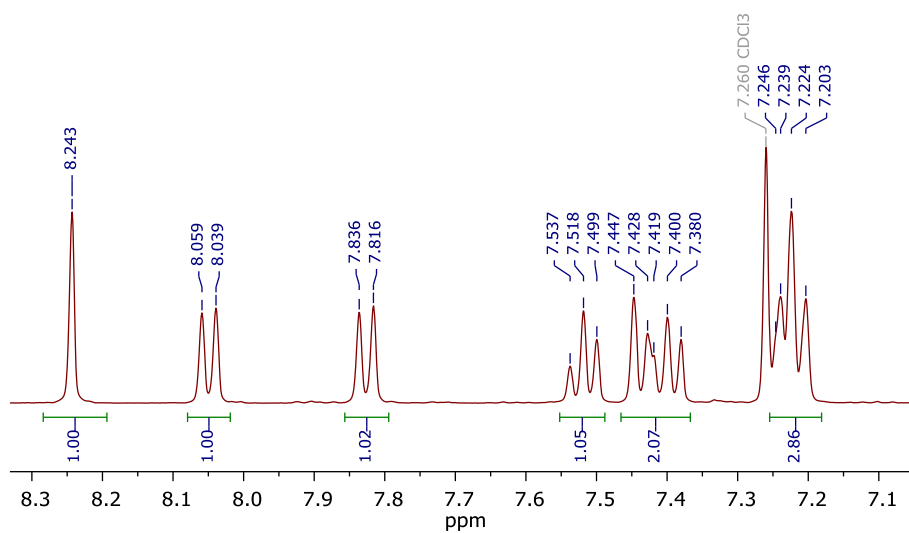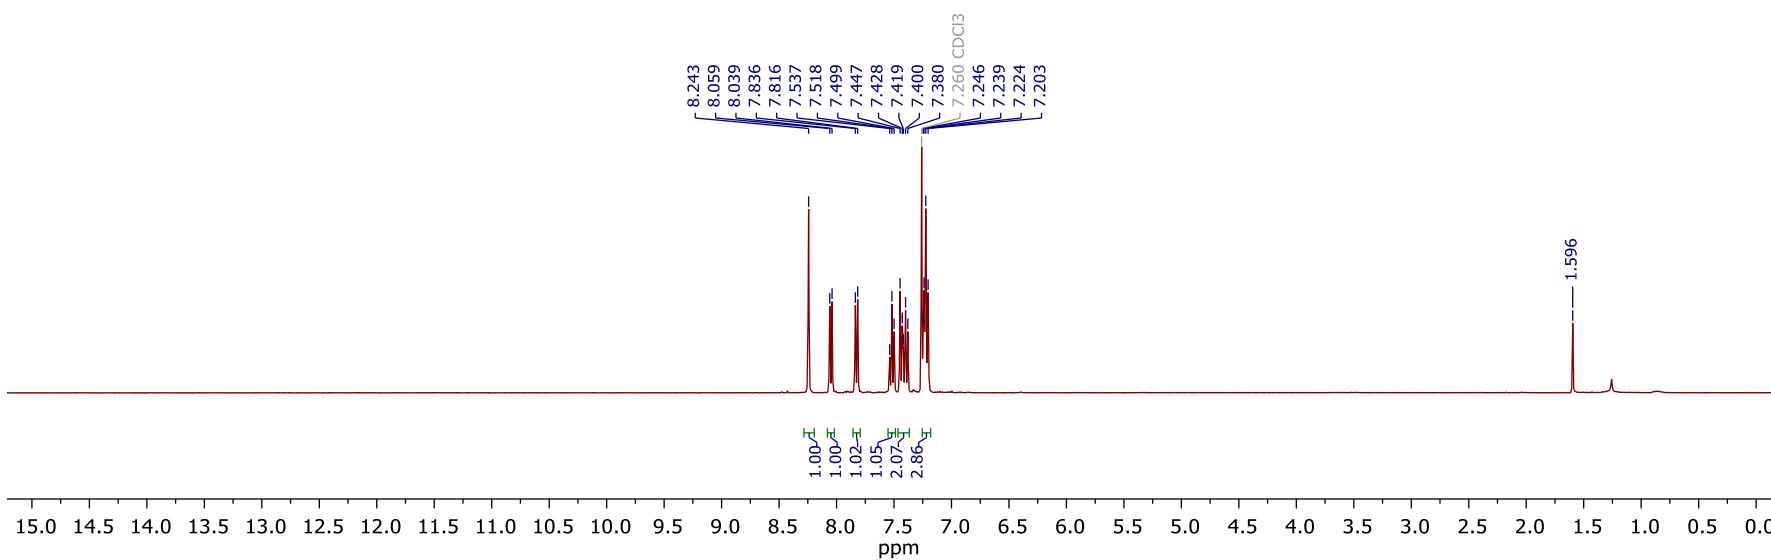

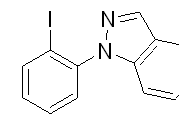

**1a**,  $^{13}\text{C}$  NMR  
100 MHz,  $\text{CDCl}_3$

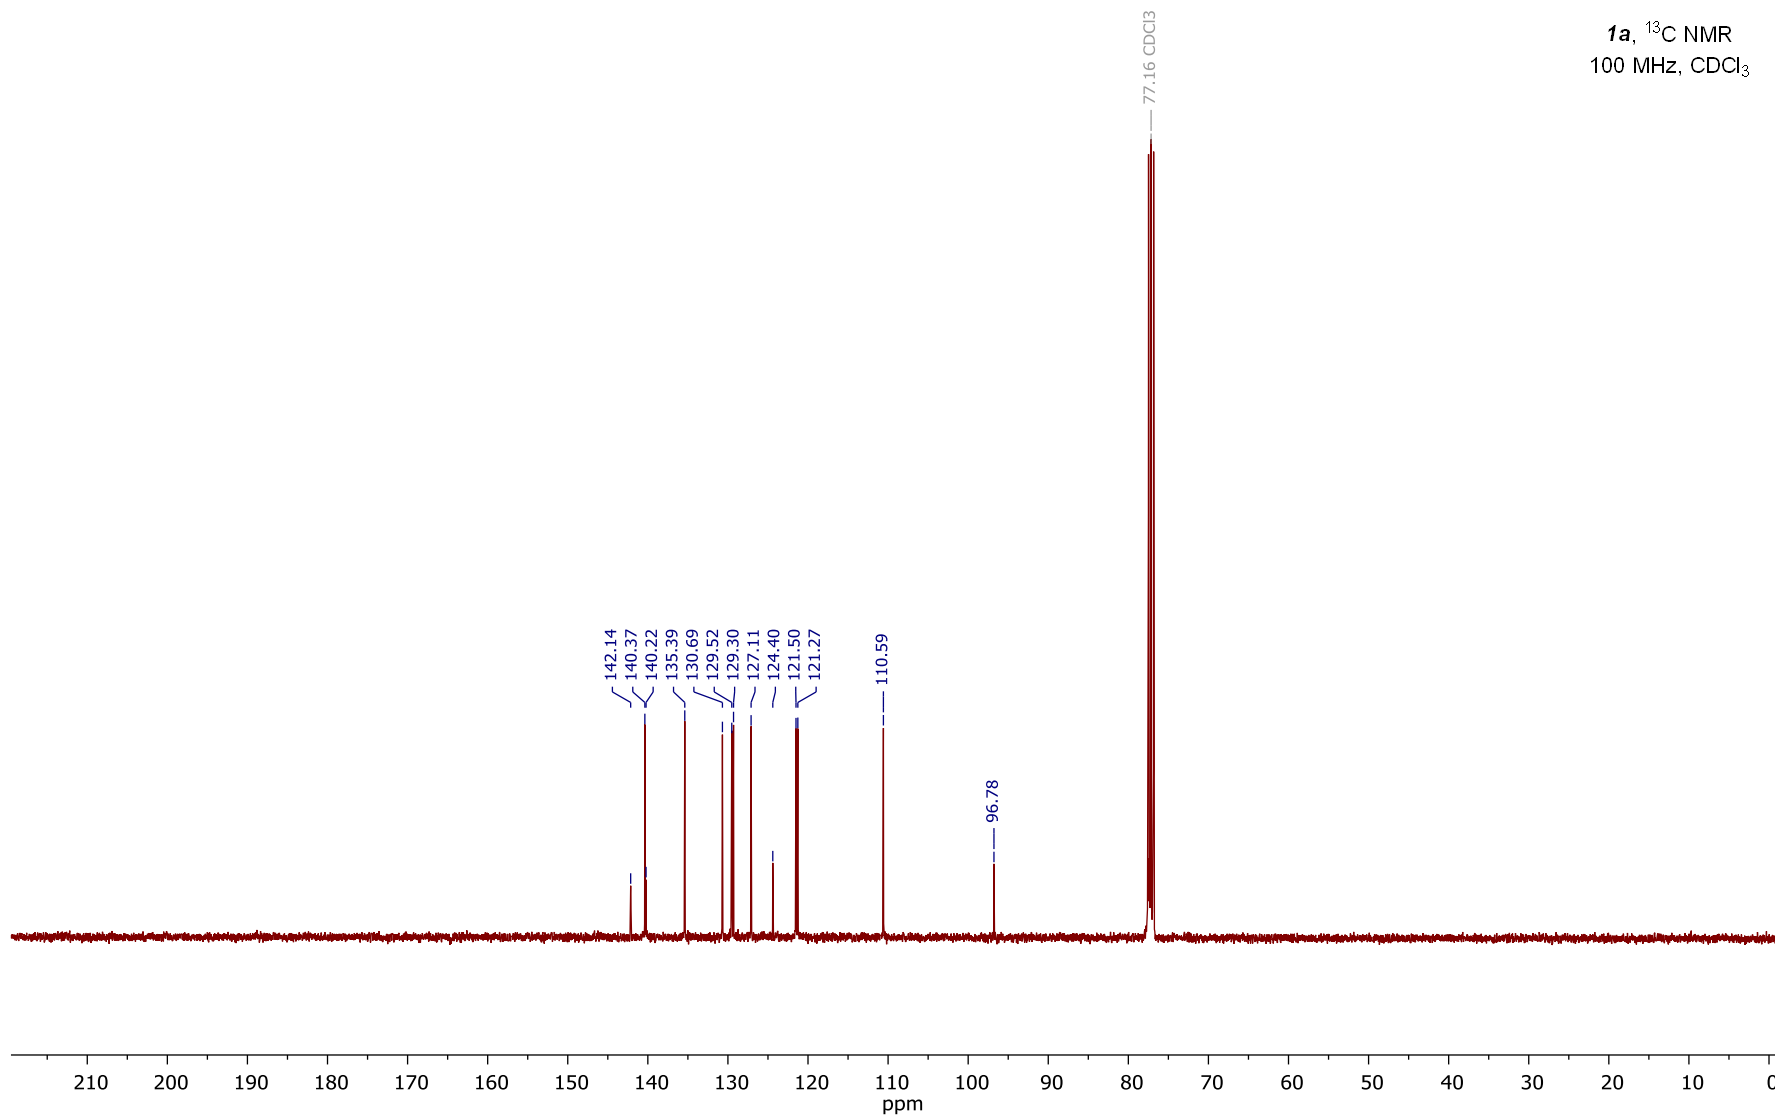

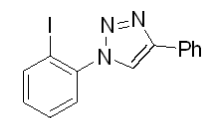

**1b**,  $^1\text{H}$  NMR  
400 MHz,  $\text{CDCl}_3$

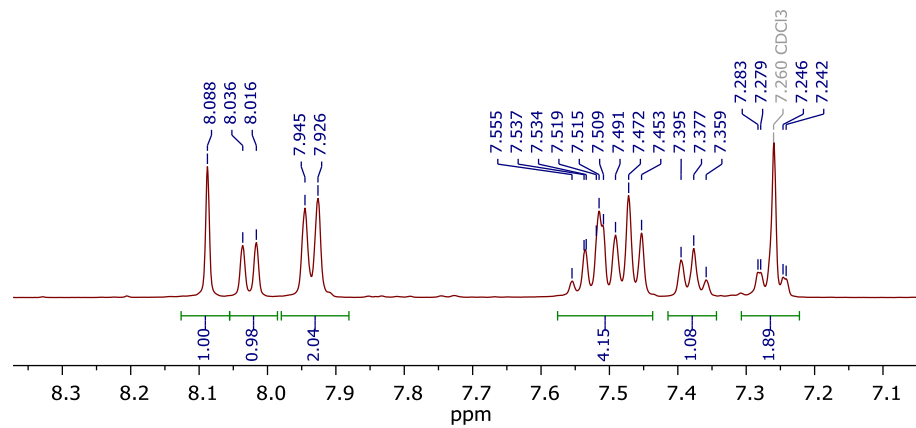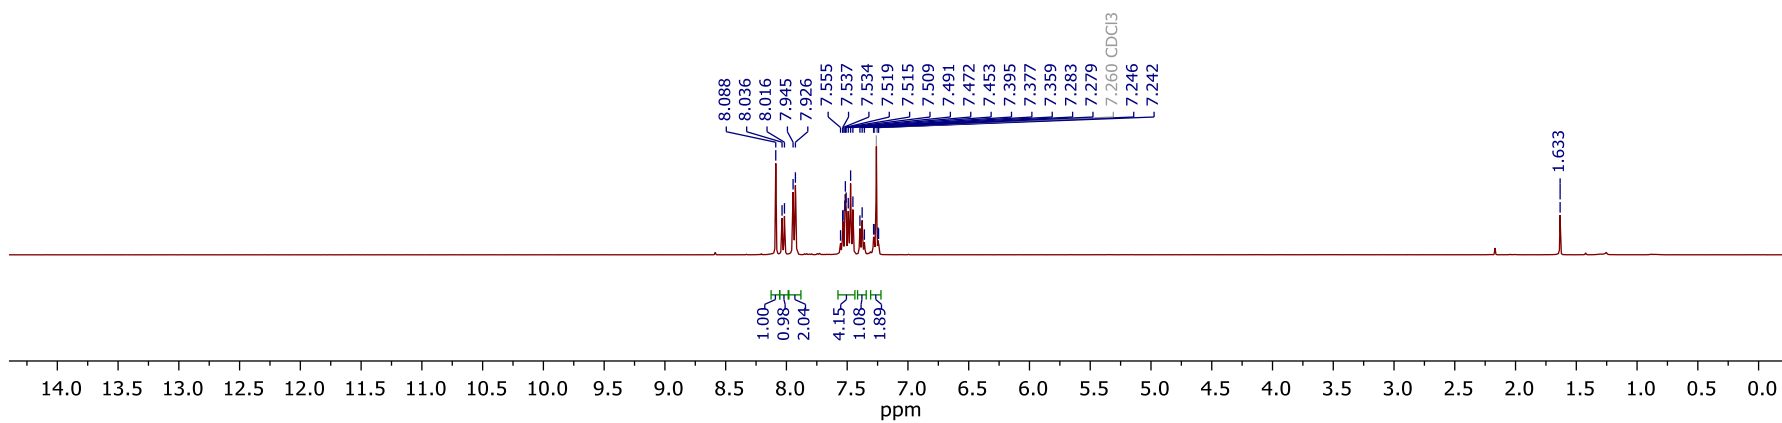

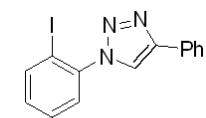

**1b**,  $^{13}\text{C}$  NMR  
100 MHz,  $\text{CDCl}_3$

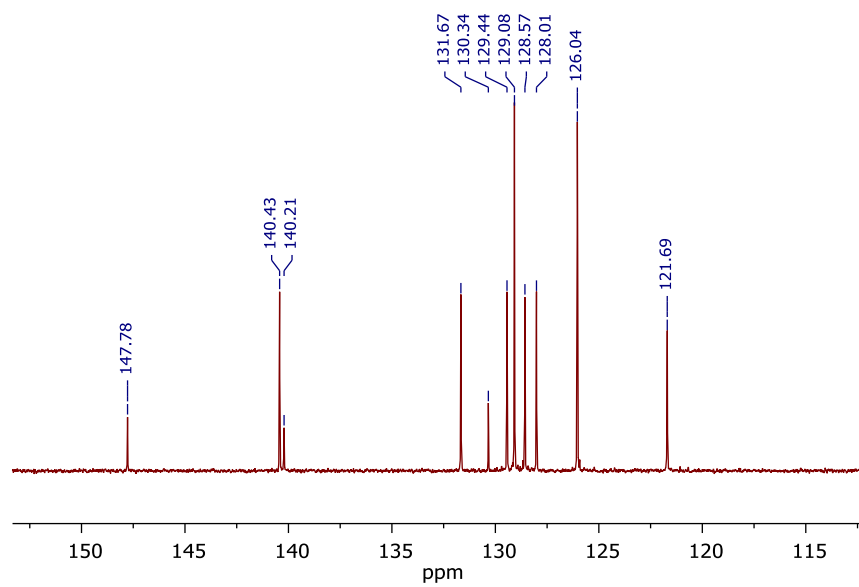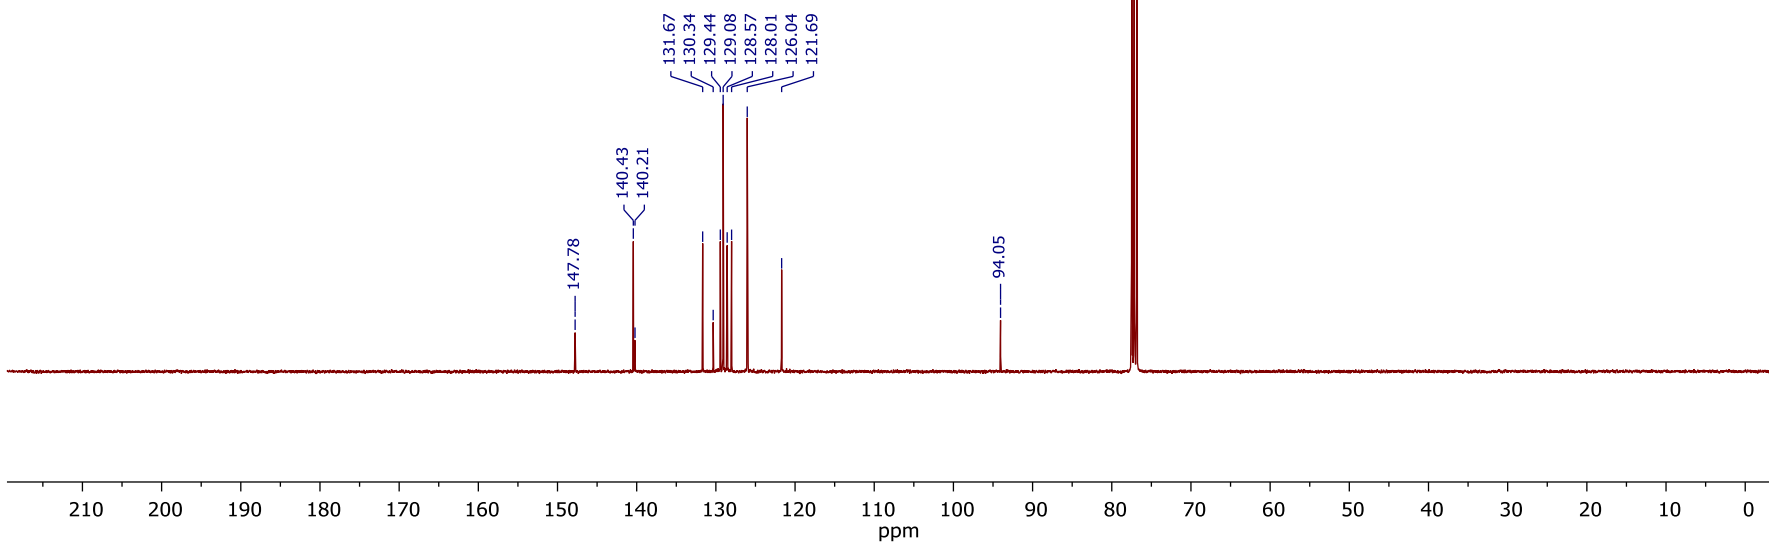

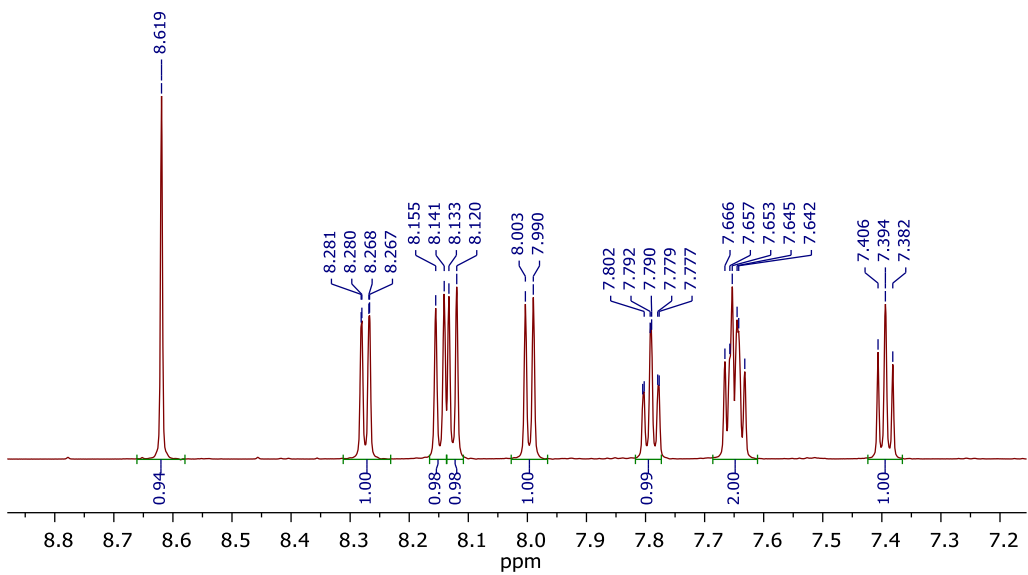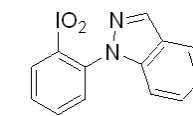

**2a**, <sup>1</sup>H NMR  
600 MHz, DMSO-d<sub>6</sub>

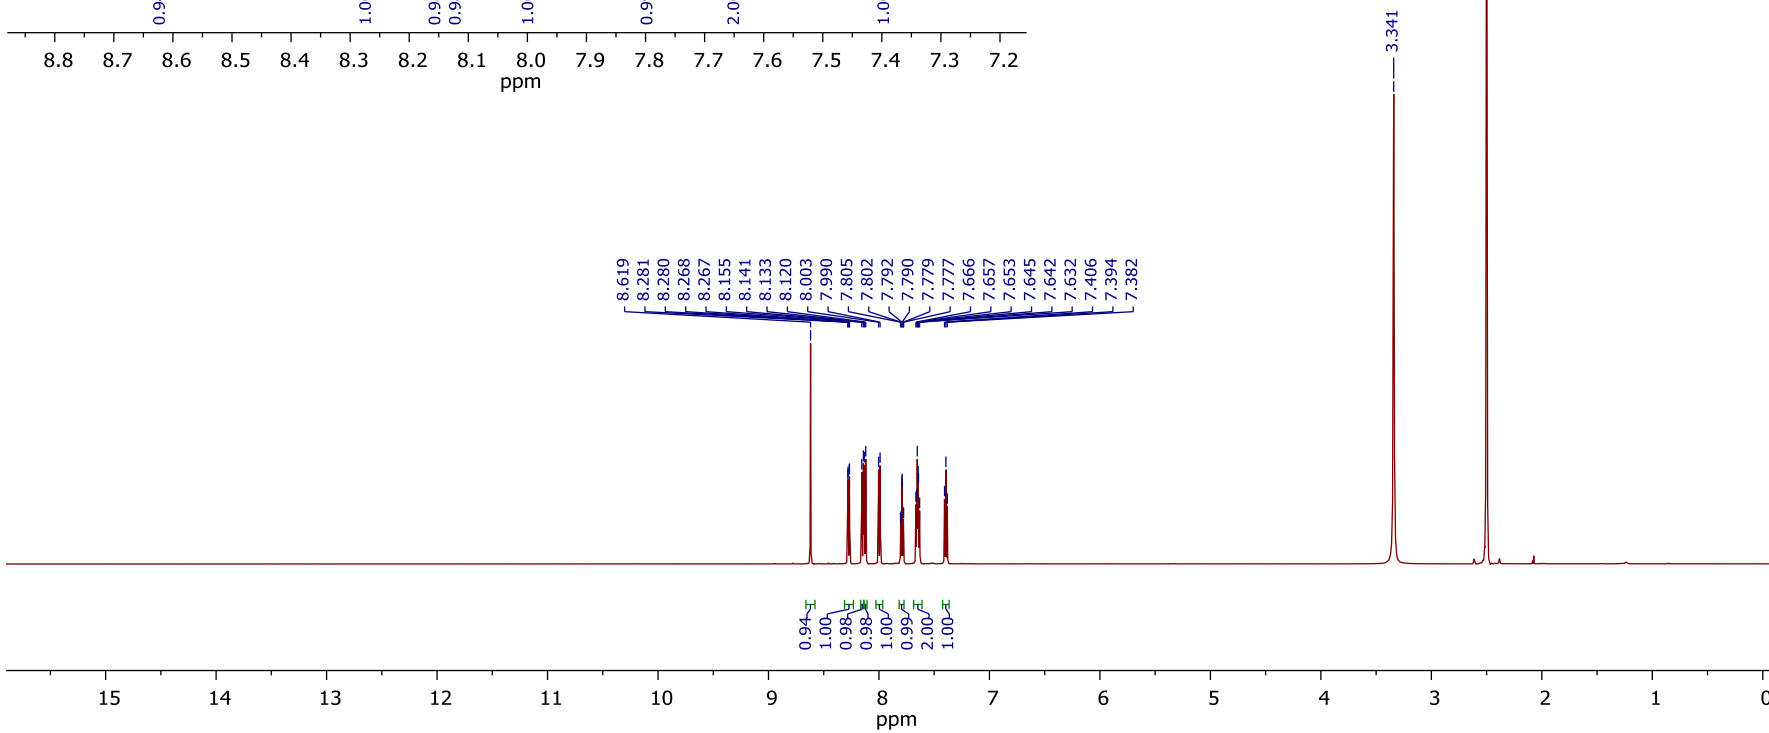



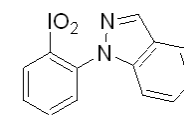

**2a**,  $^{13}\text{C}$  NMR  
150 MHz,  $\text{DMSO-}d_6$

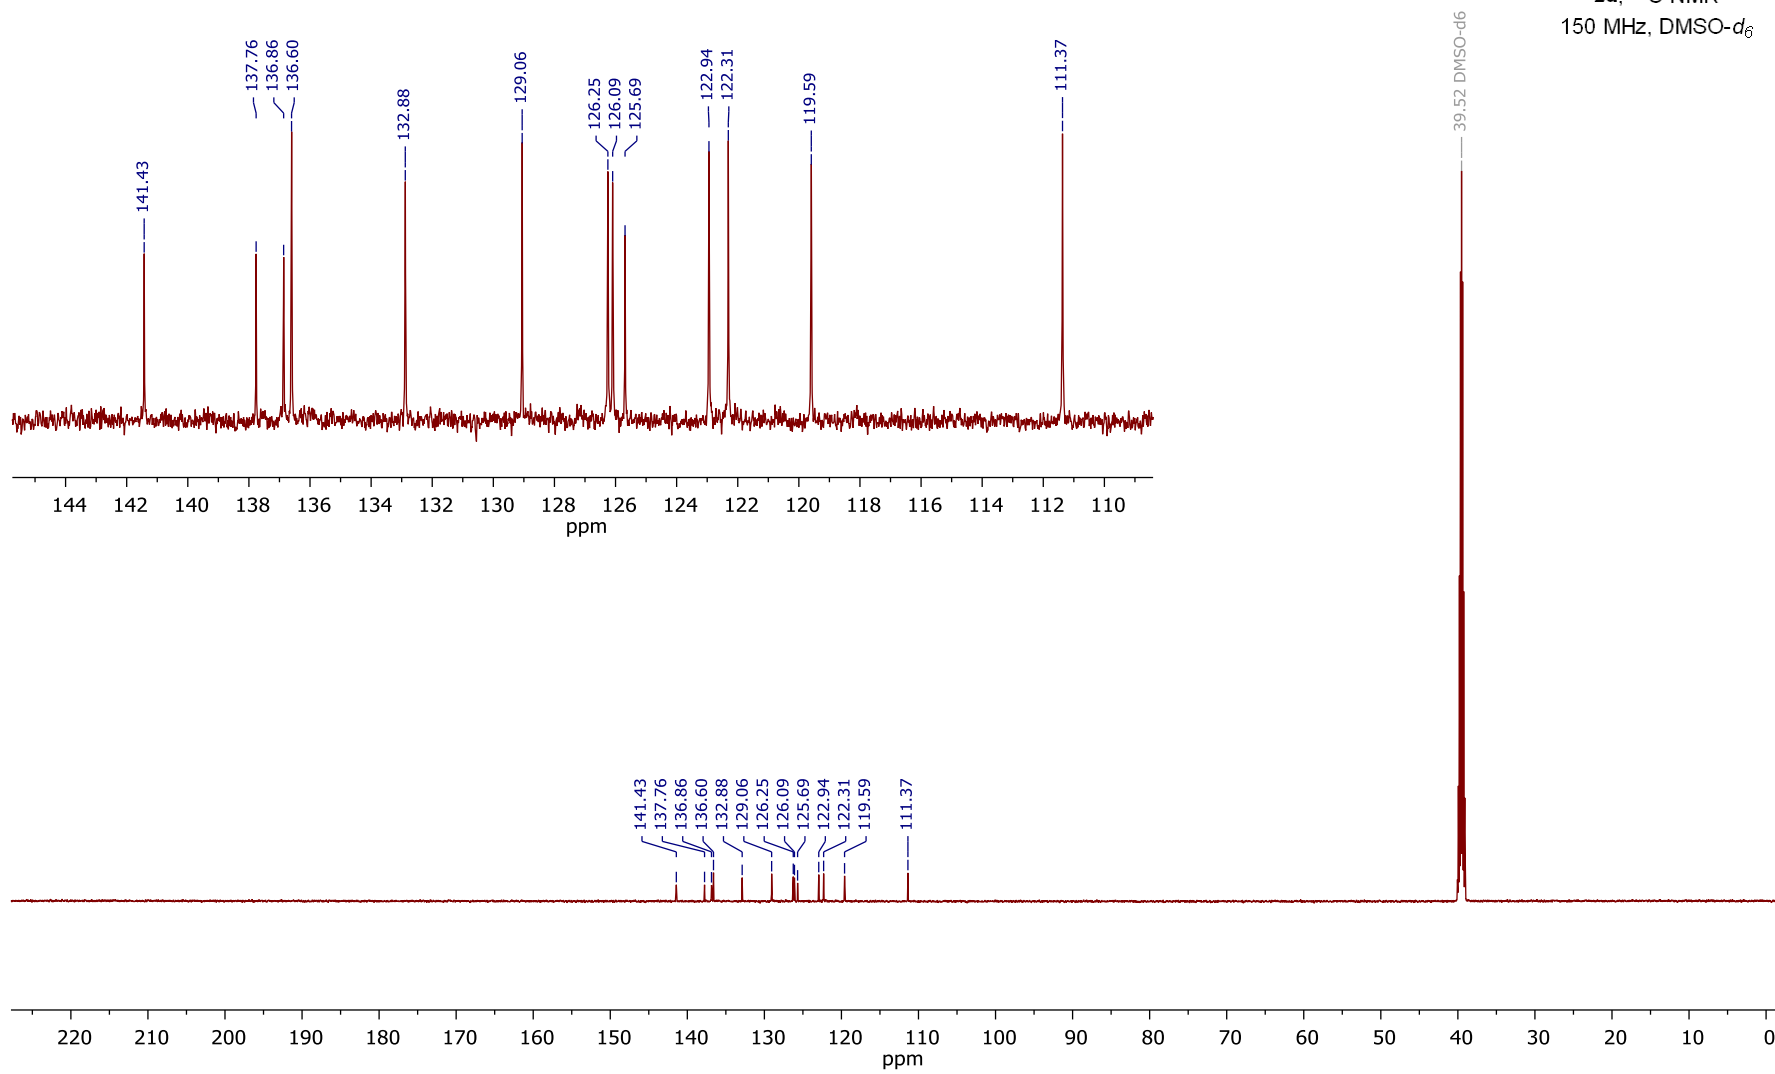

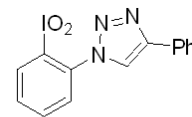

**2b**,  $^1\text{H}$  NMR  
600 MHz,  $\text{DMSO-}d_6$

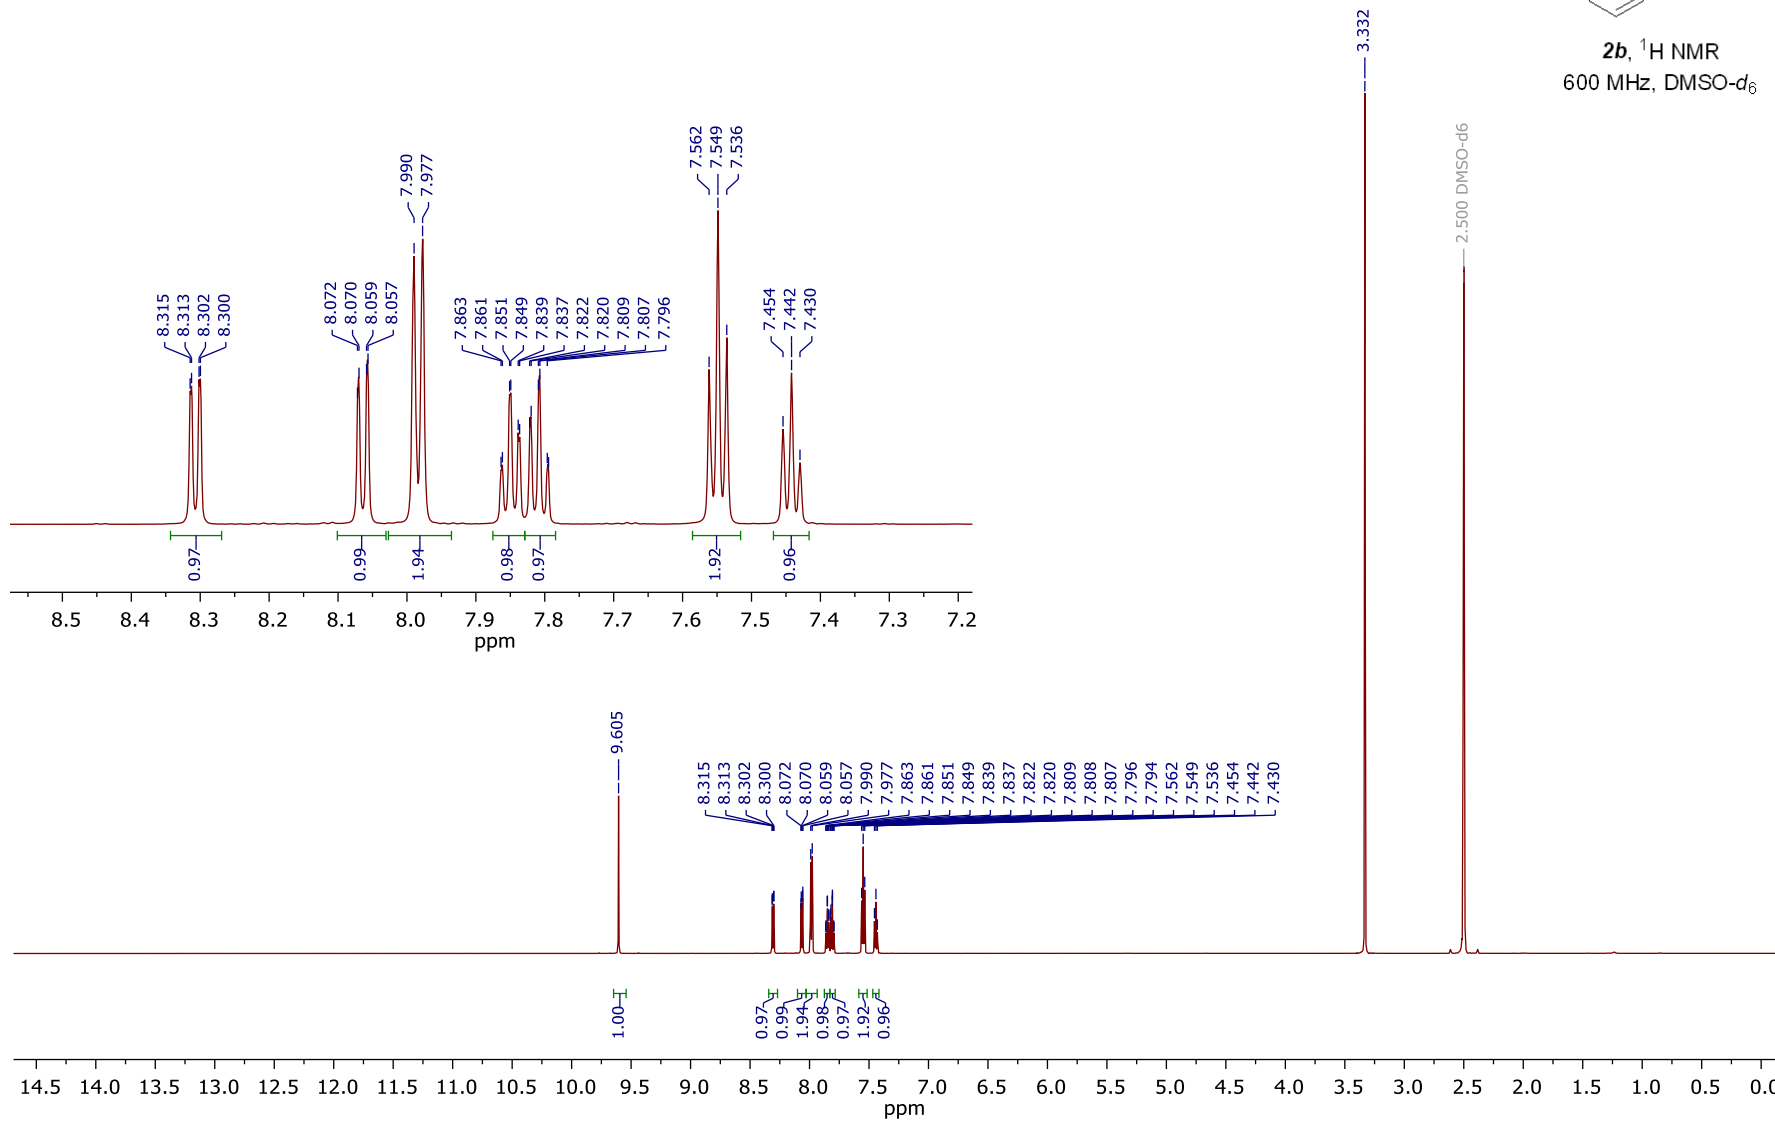

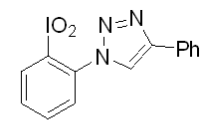

**2b**,  $^{13}\text{C}$  NMR  
150 MHz,  $\text{DMSO-}d_6$

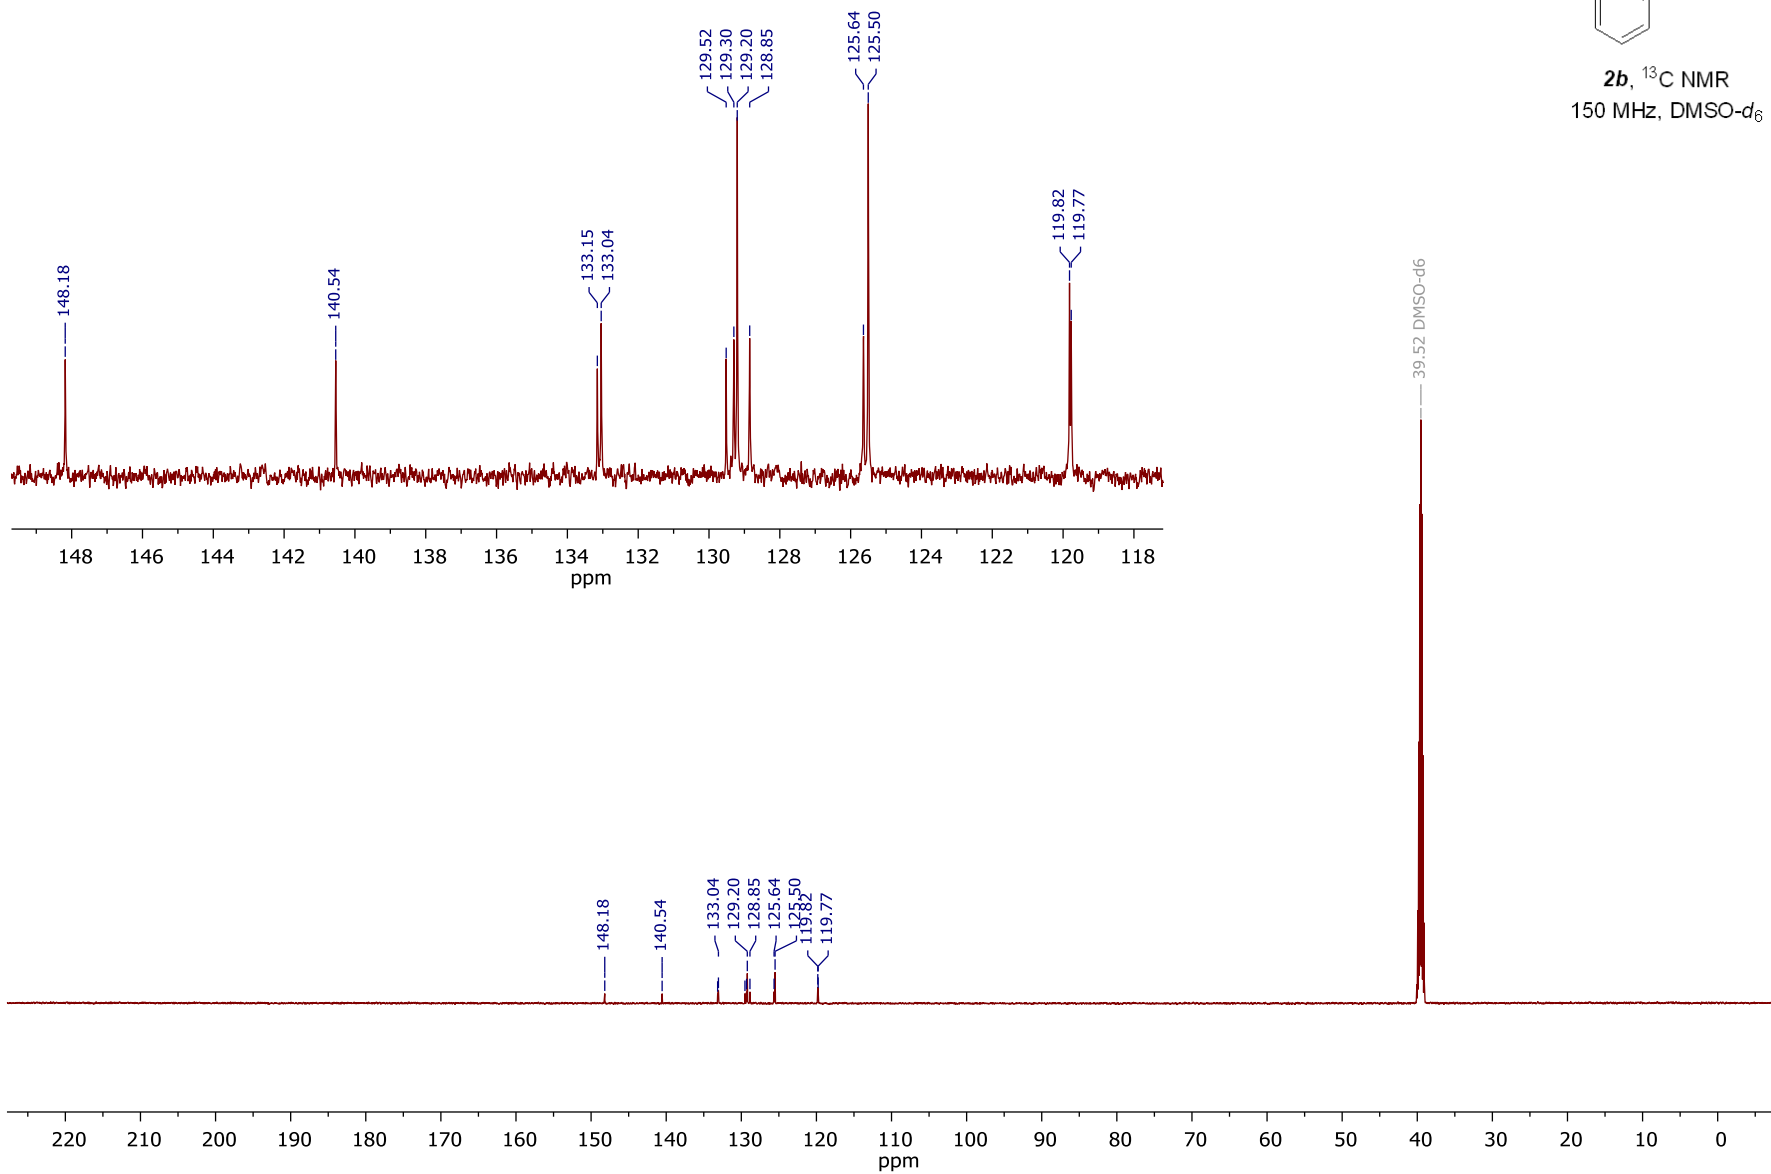

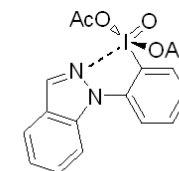

**2a'**,  $^1\text{H NMR}$   
600 MHz,  $\text{CDCl}_3$   
*Reaction mixture after 6 h*

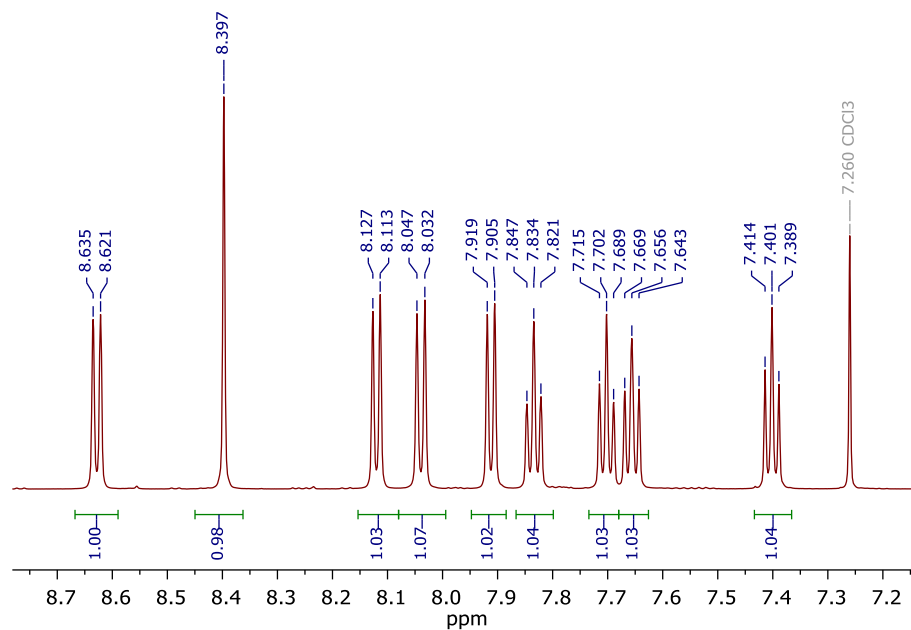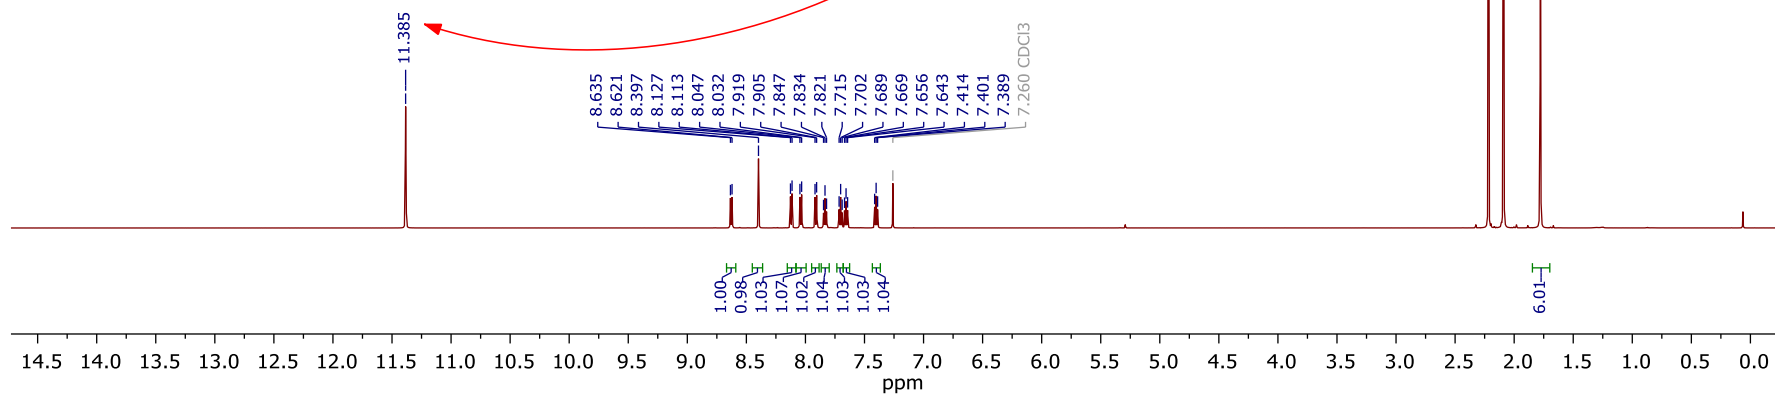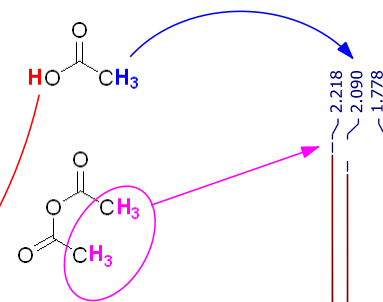

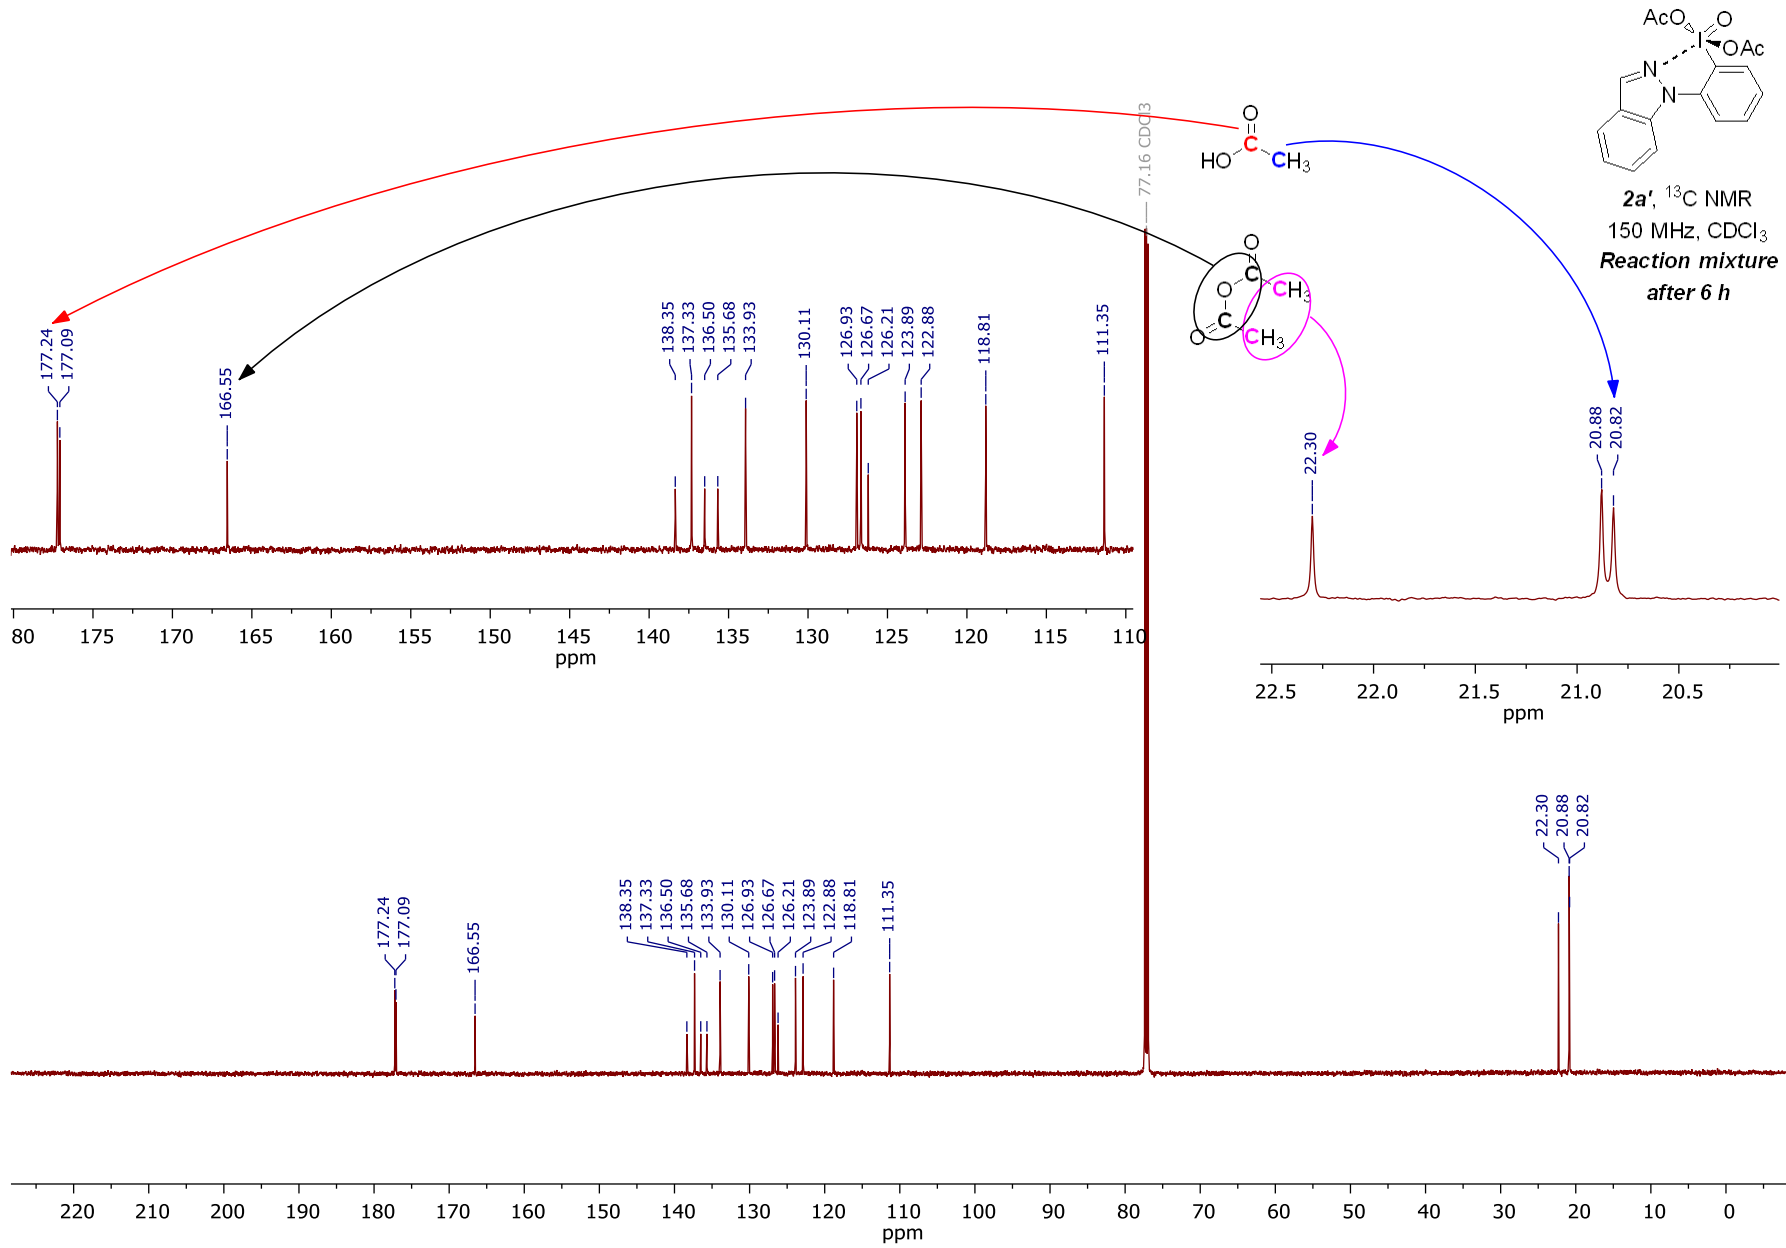

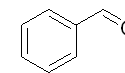

**3a**,  $^1\text{H}$  NMR  
400 MHz,  $\text{CDCl}_3$   
NMR yield

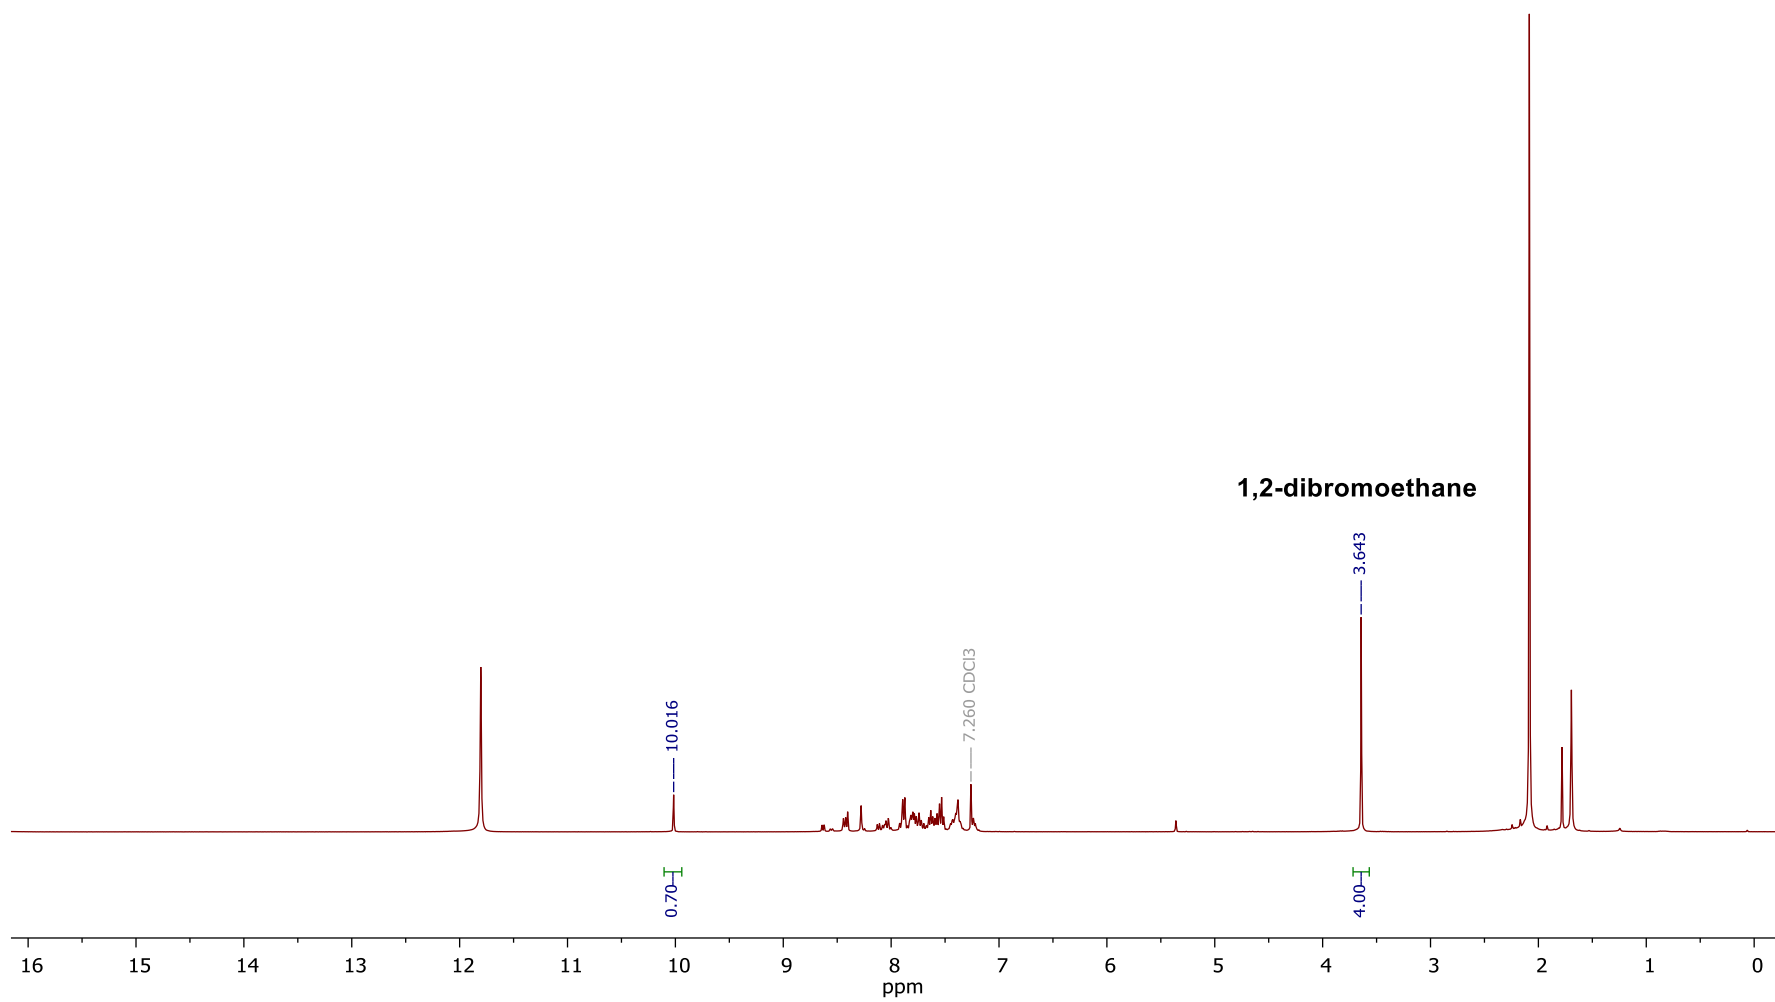

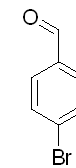

**3b**,  $^1\text{H NMR}$   
600 MHz,  $\text{CDCl}_3$

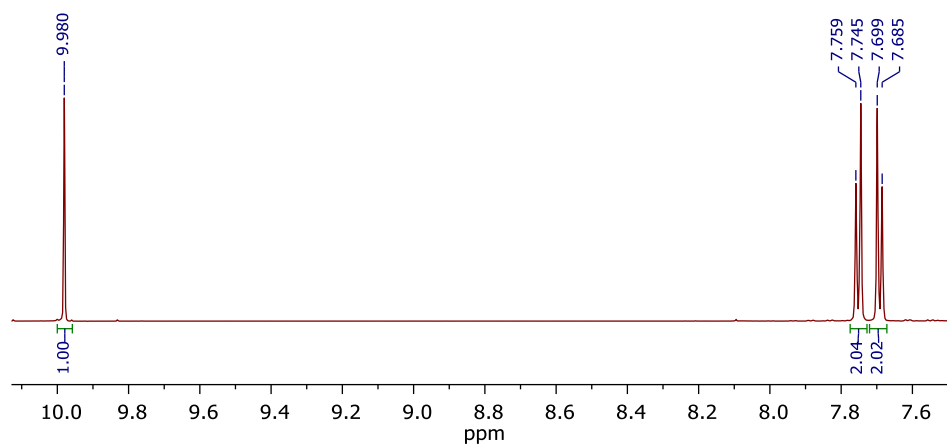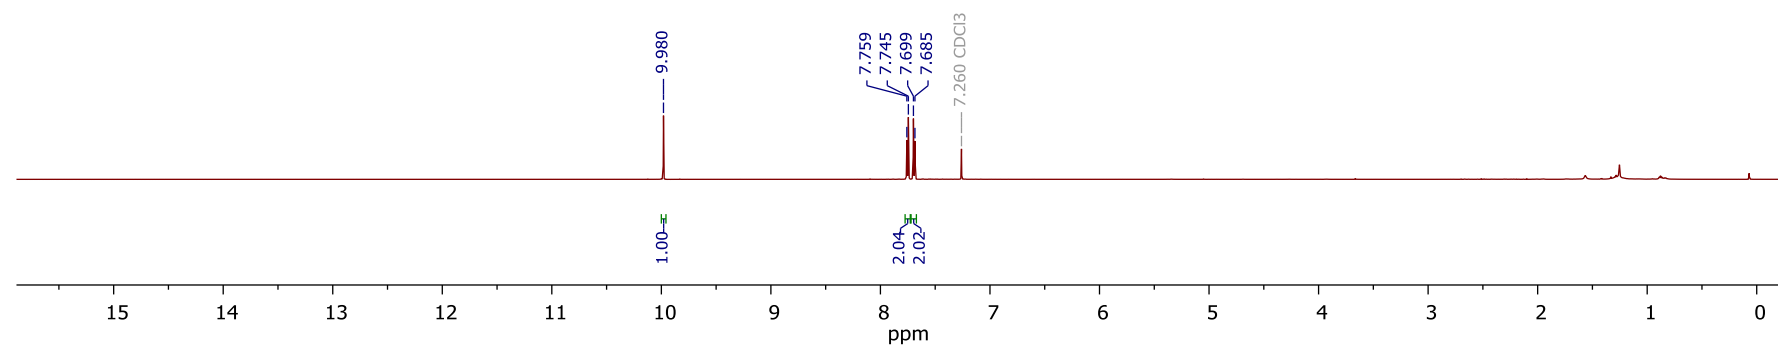

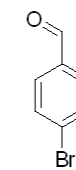

**3b**,  $^{13}\text{C}$  NMR  
150 MHz,  $\text{CDCl}_3$

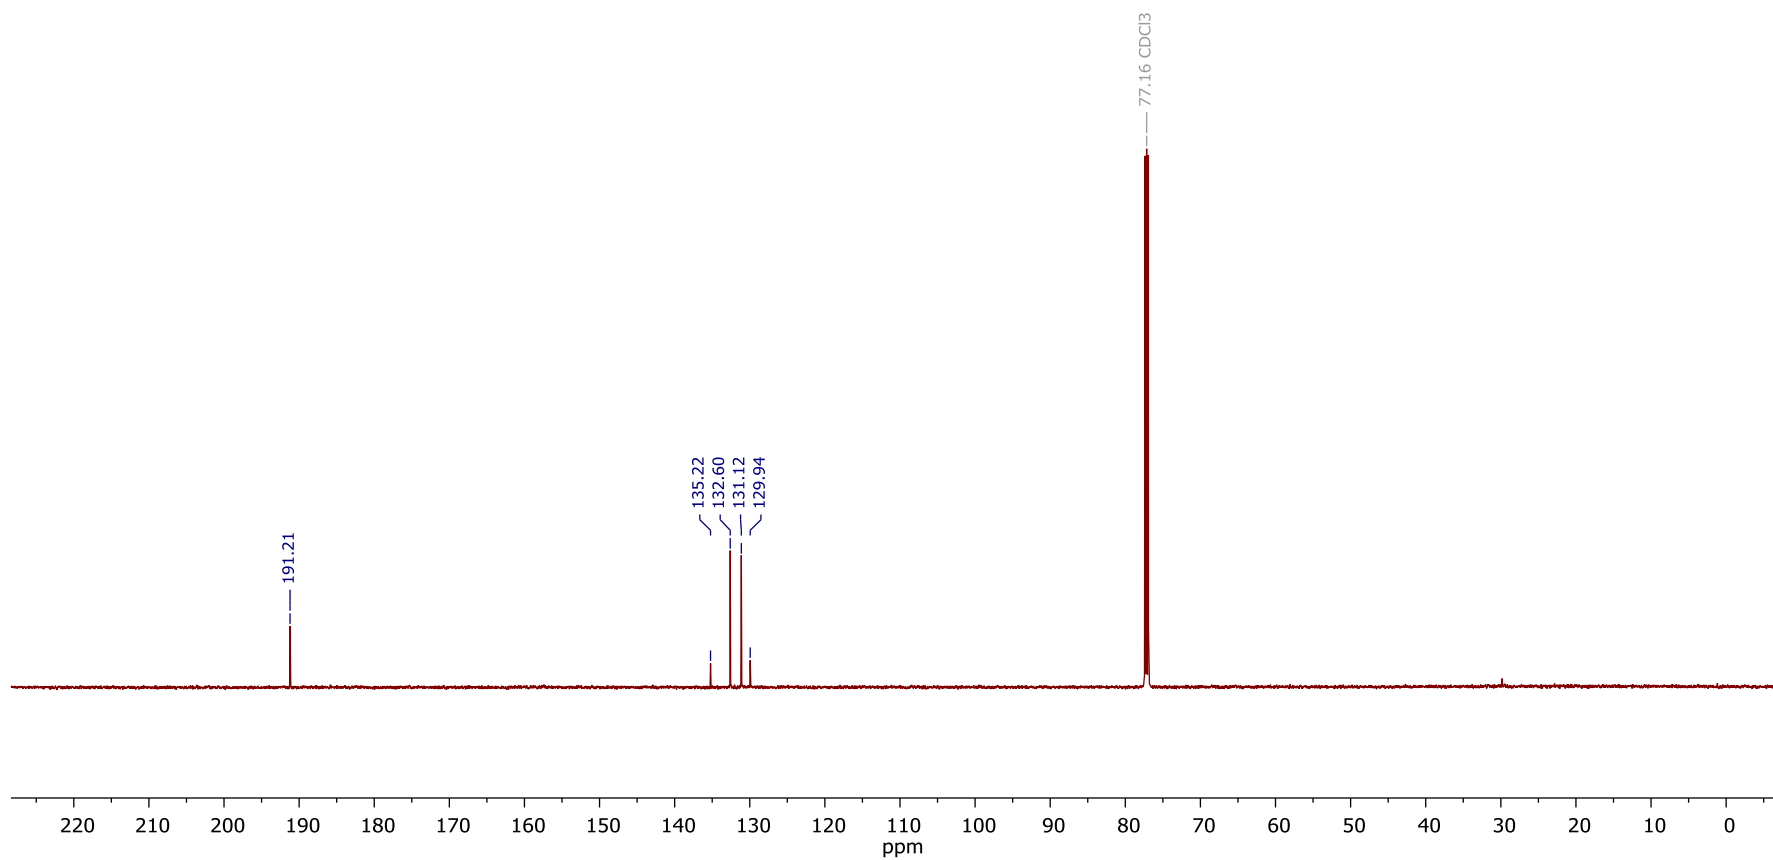



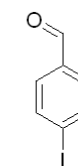

**3c**,  $^1\text{H}$  NMR  
600 MHz,  $\text{DMSO-}d_6$

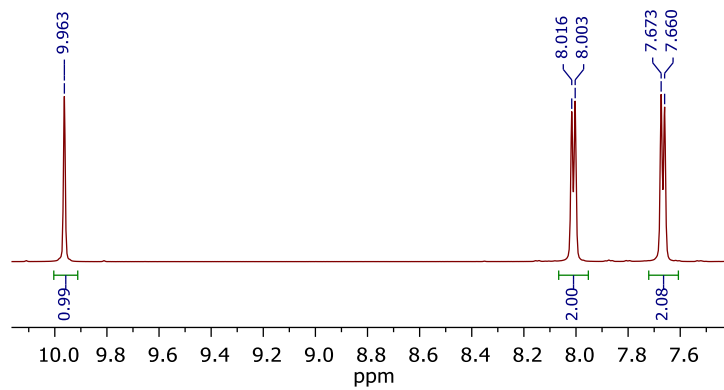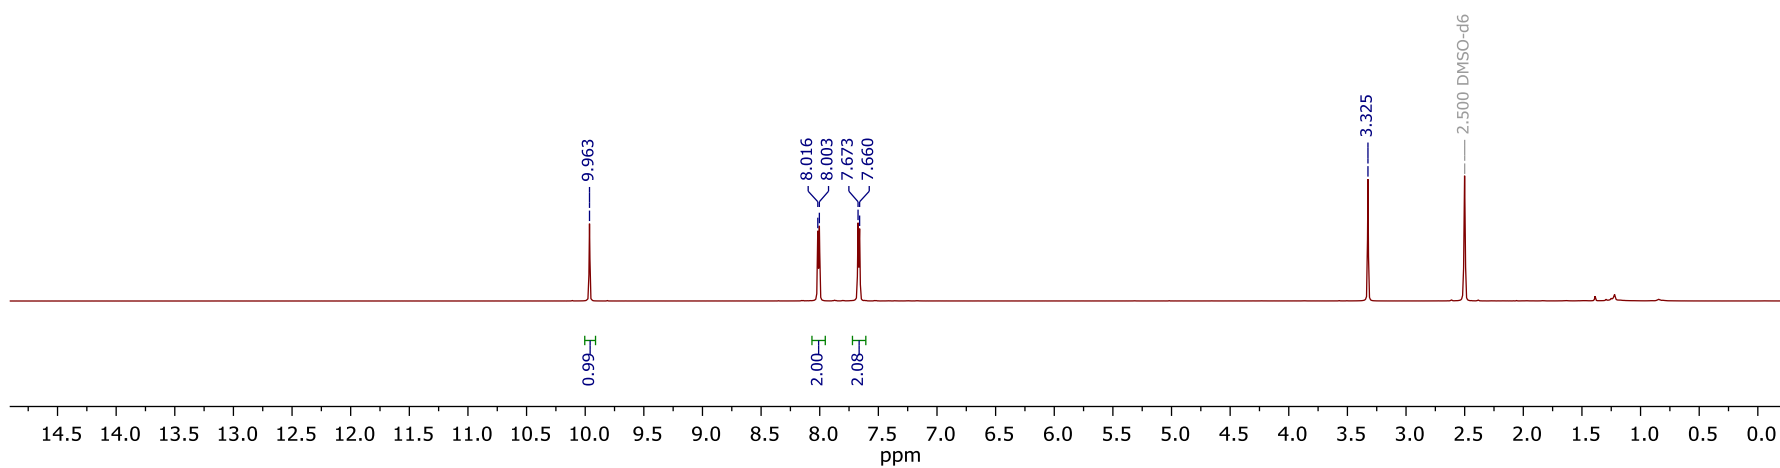

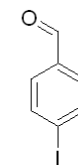

**3c**,  $^{13}\text{C}$  NMR  
150 MHz,  $\text{DMSO-}d_6$

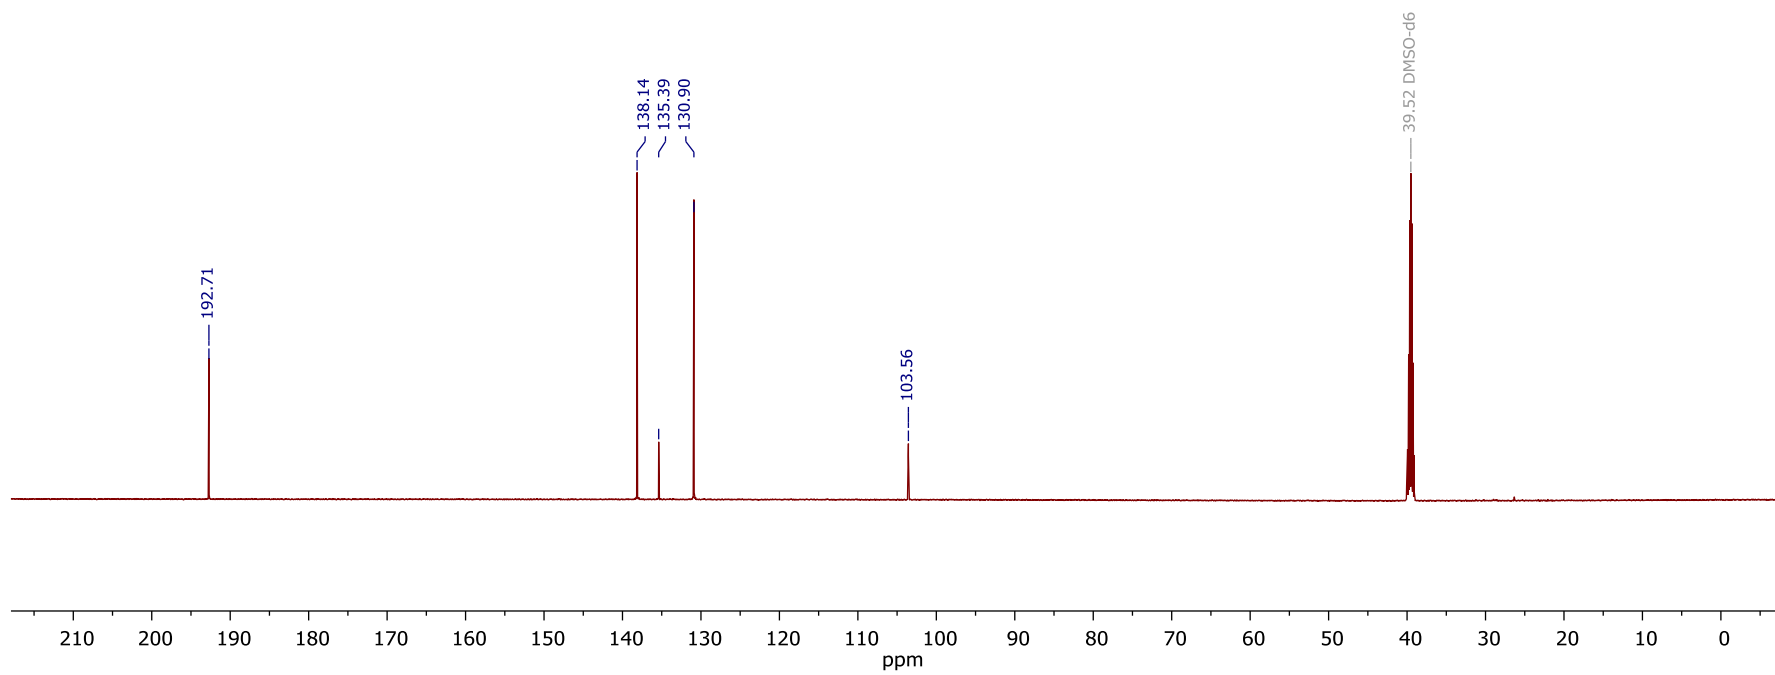

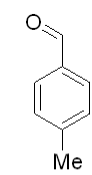

3d, <sup>1</sup>H NMR  
400 MHz, CDCl<sub>3</sub>

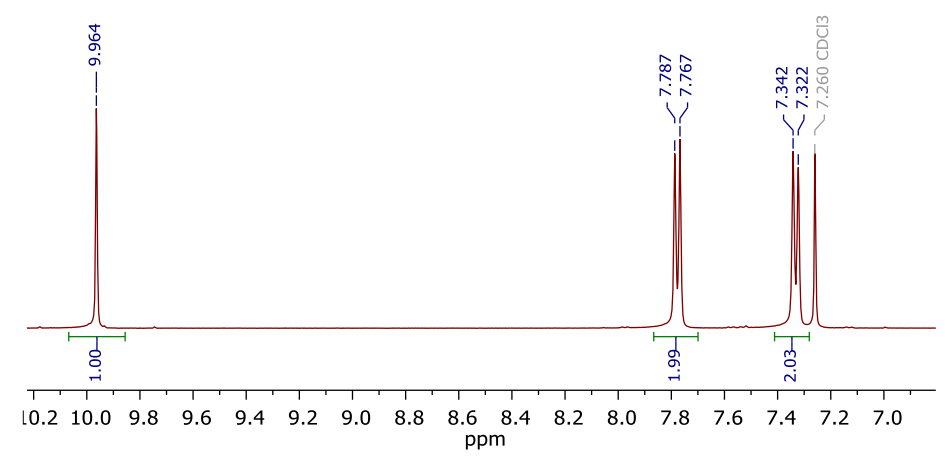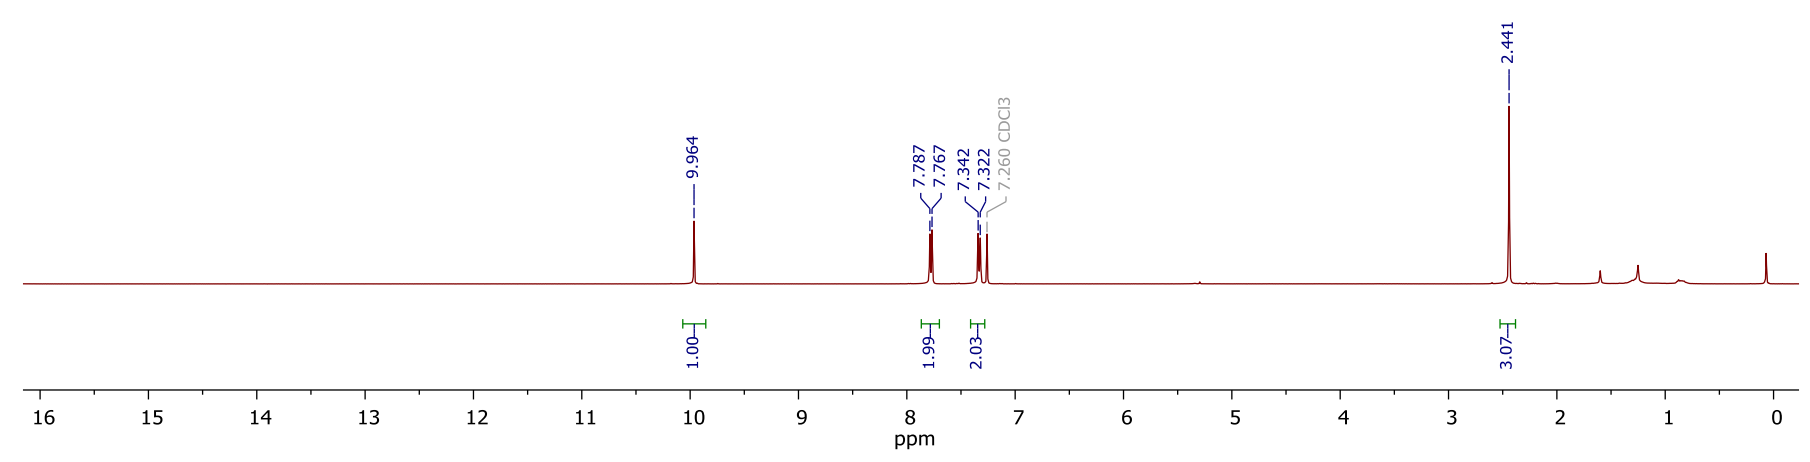

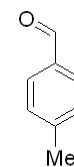

**3d**,  $^{13}\text{C}$  NMR  
100 MHz,  $\text{CDCl}_3$

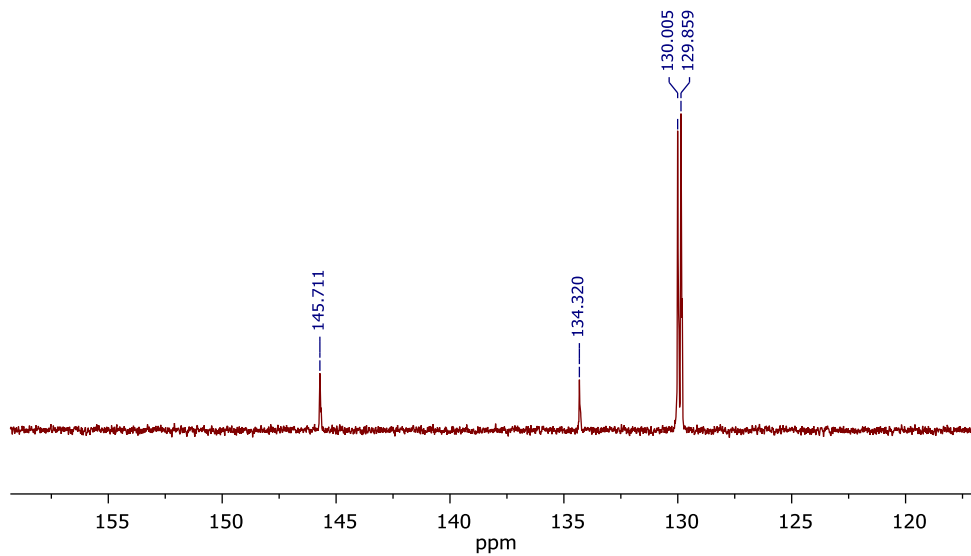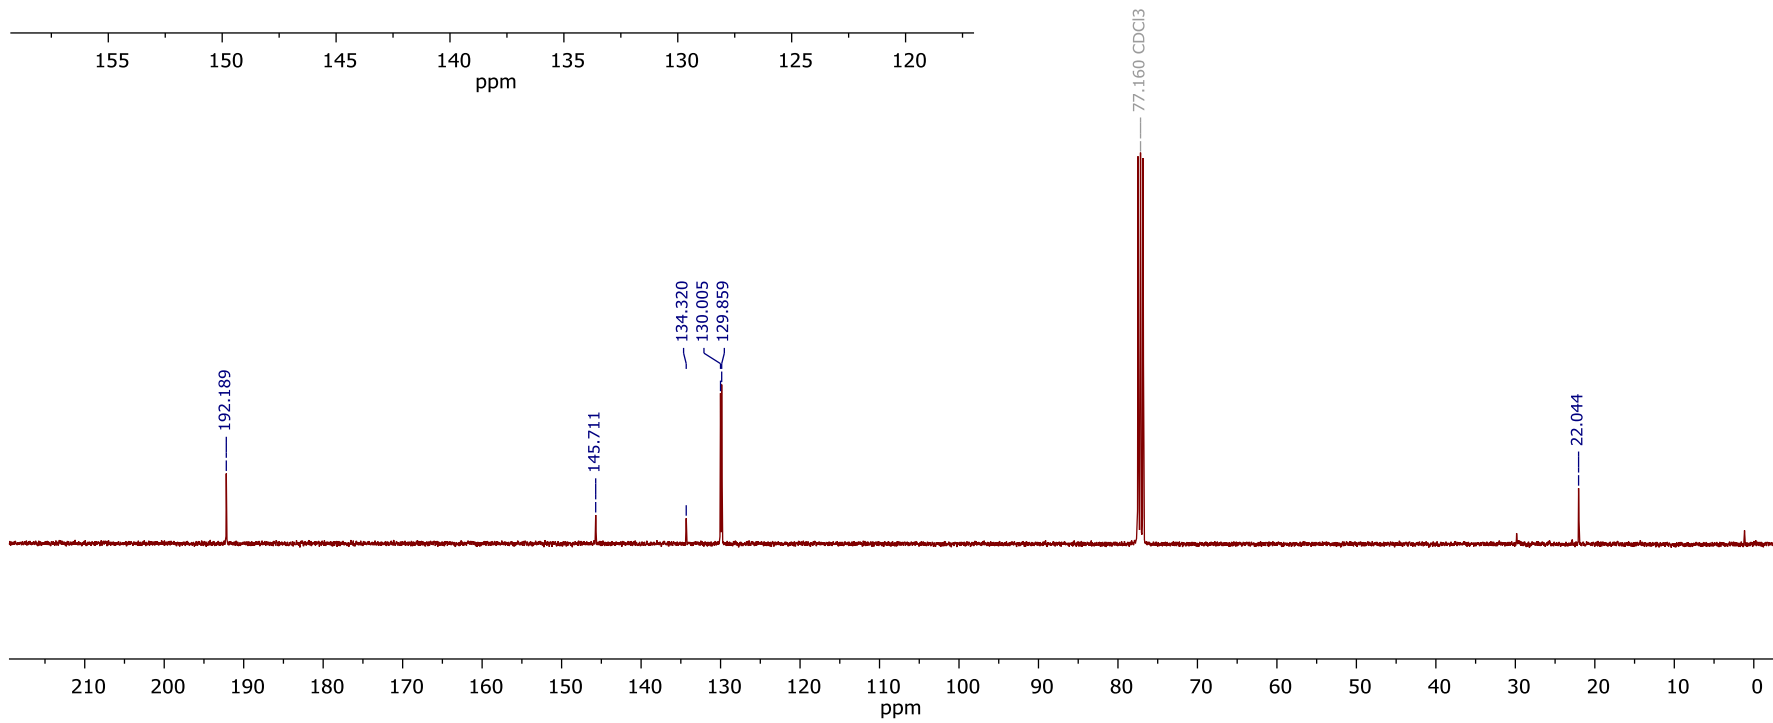

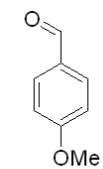

**3e**,  $^1\text{H}$  NMR  
400 MHz,  $\text{DMSO-}d_6$

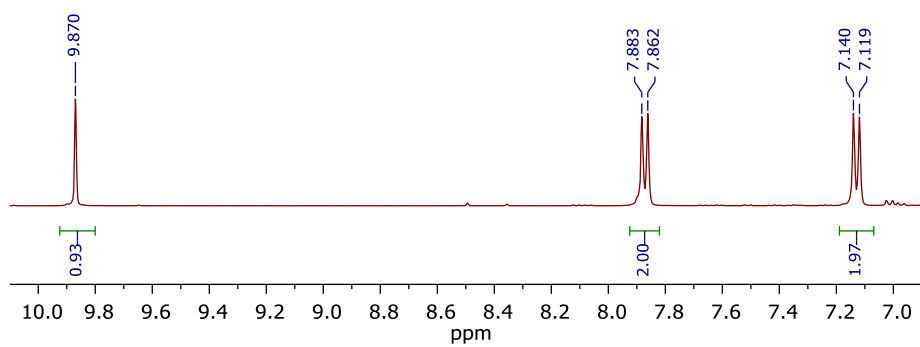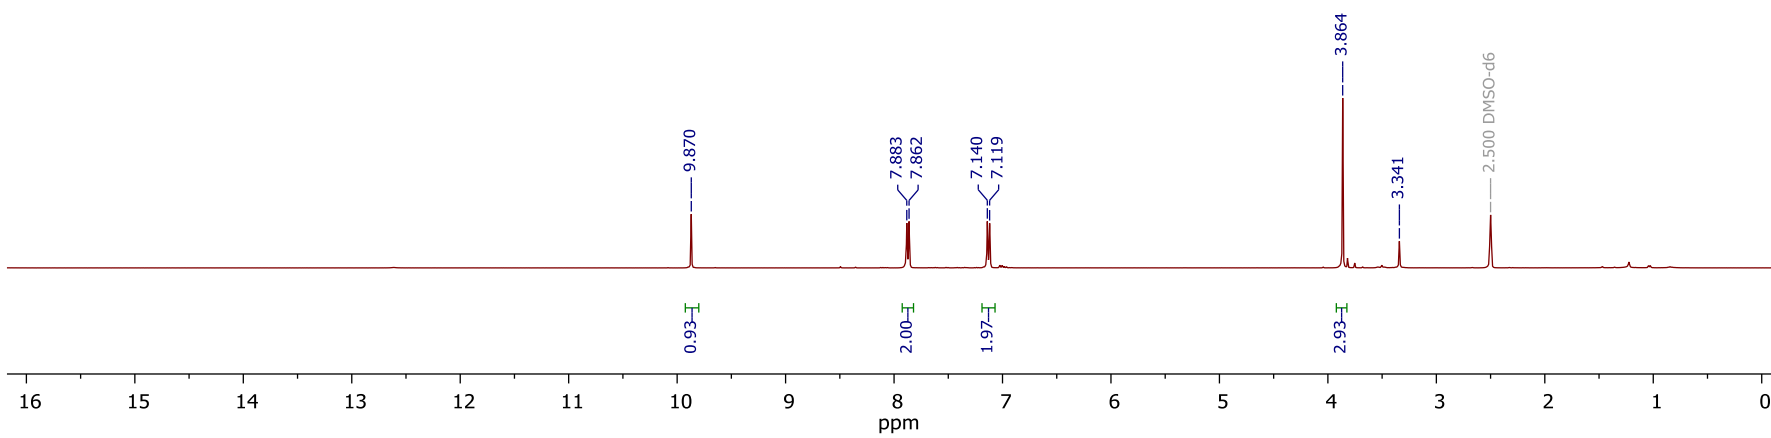

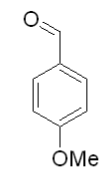

**3e**,  $^{13}\text{C}$  NMR  
100 MHz,  $\text{DMSO-}d_6$

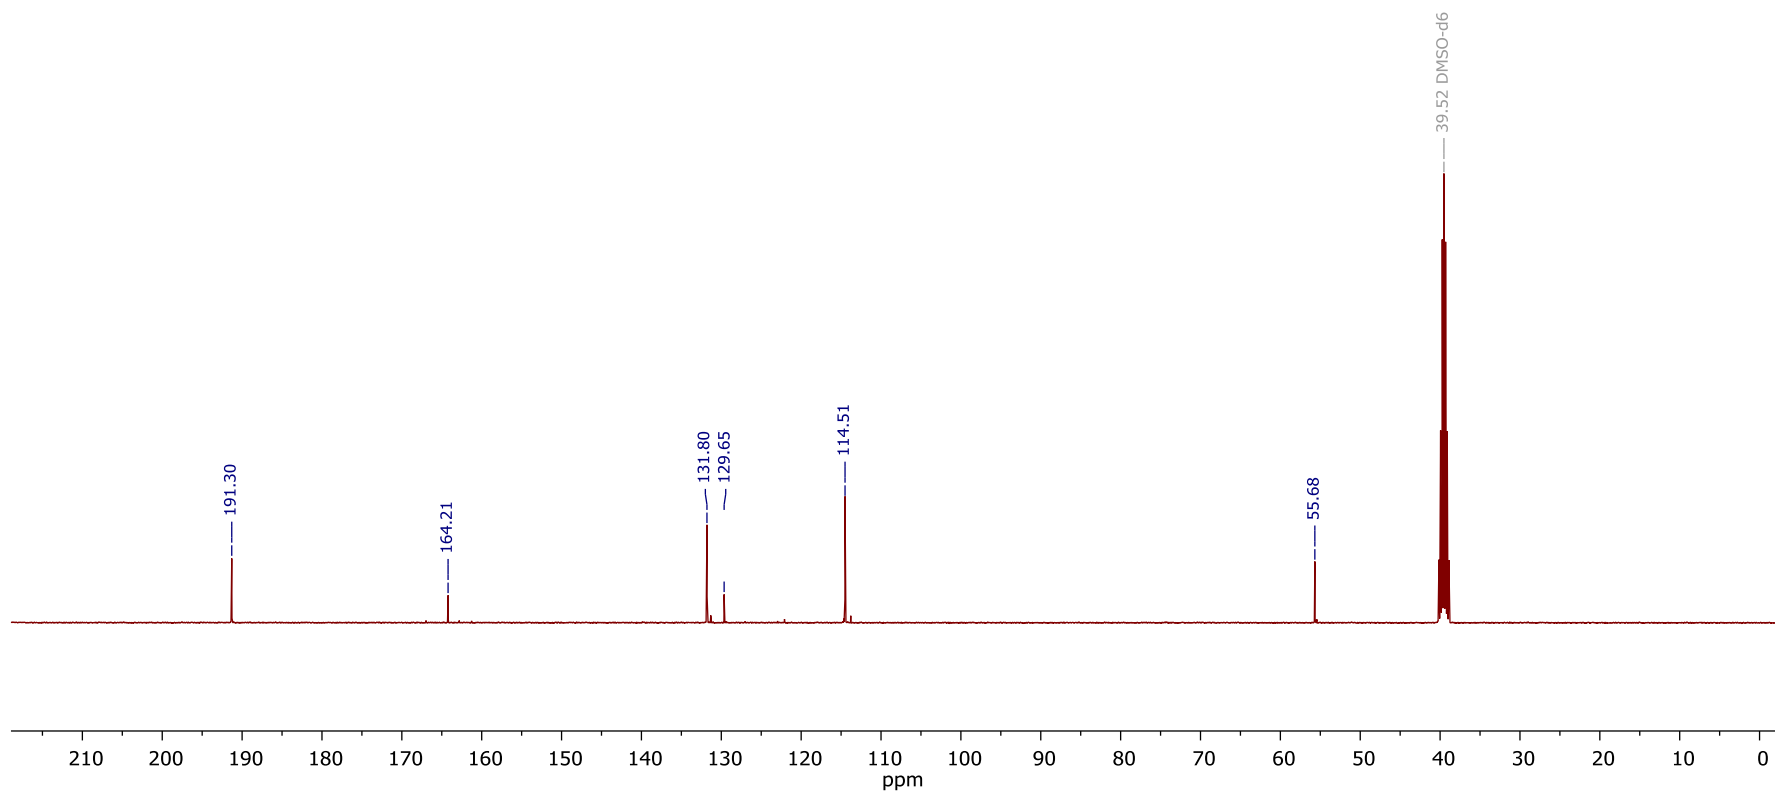

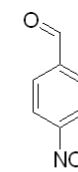

**3f**,  $^1\text{H}$  NMR  
400 MHz,  $\text{DMSO-}d_6$

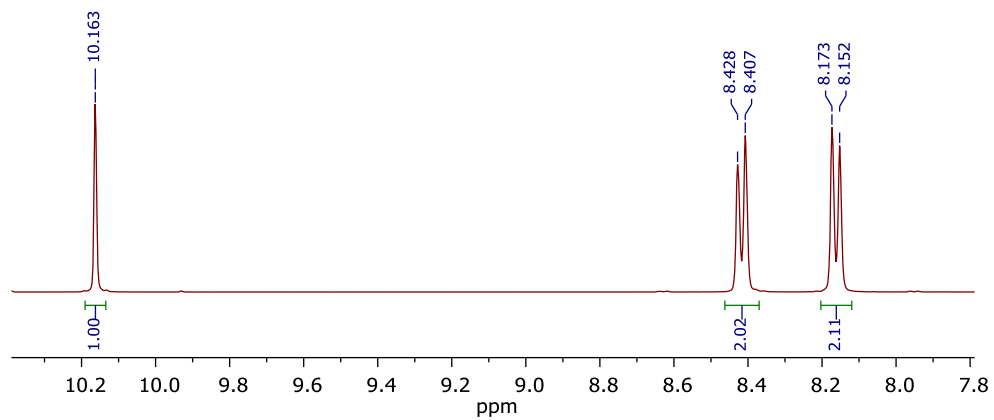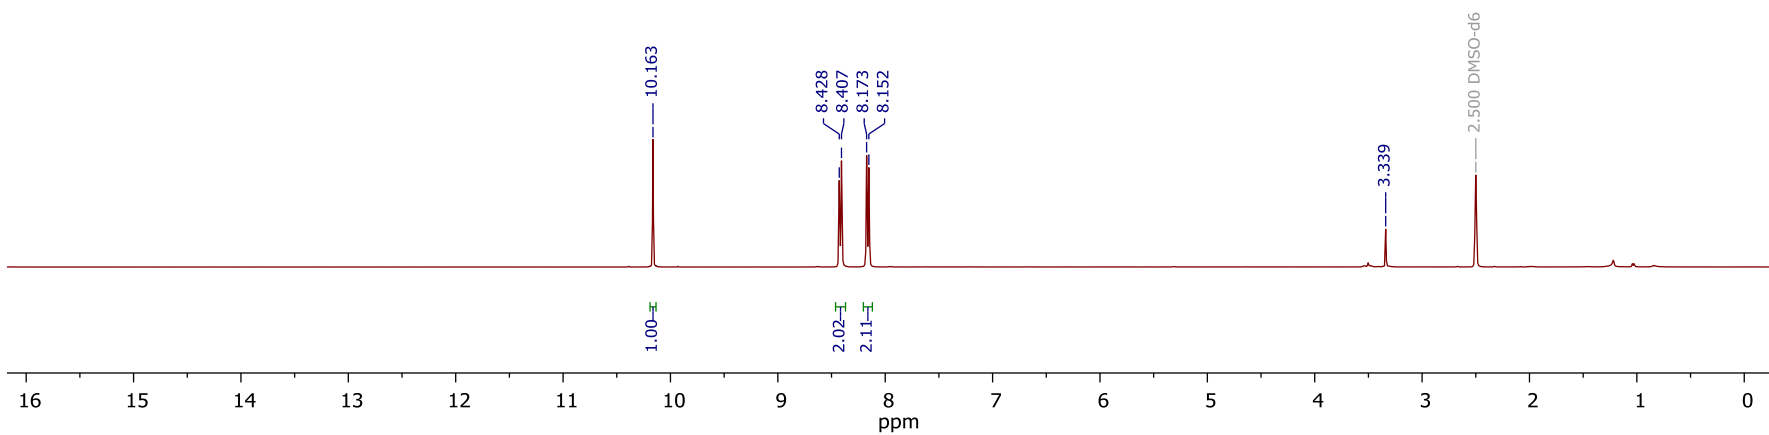

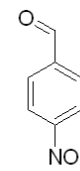

**3f**,  $^{13}\text{C}$  NMR  
100 MHz,  $\text{DMSO-}d_6$

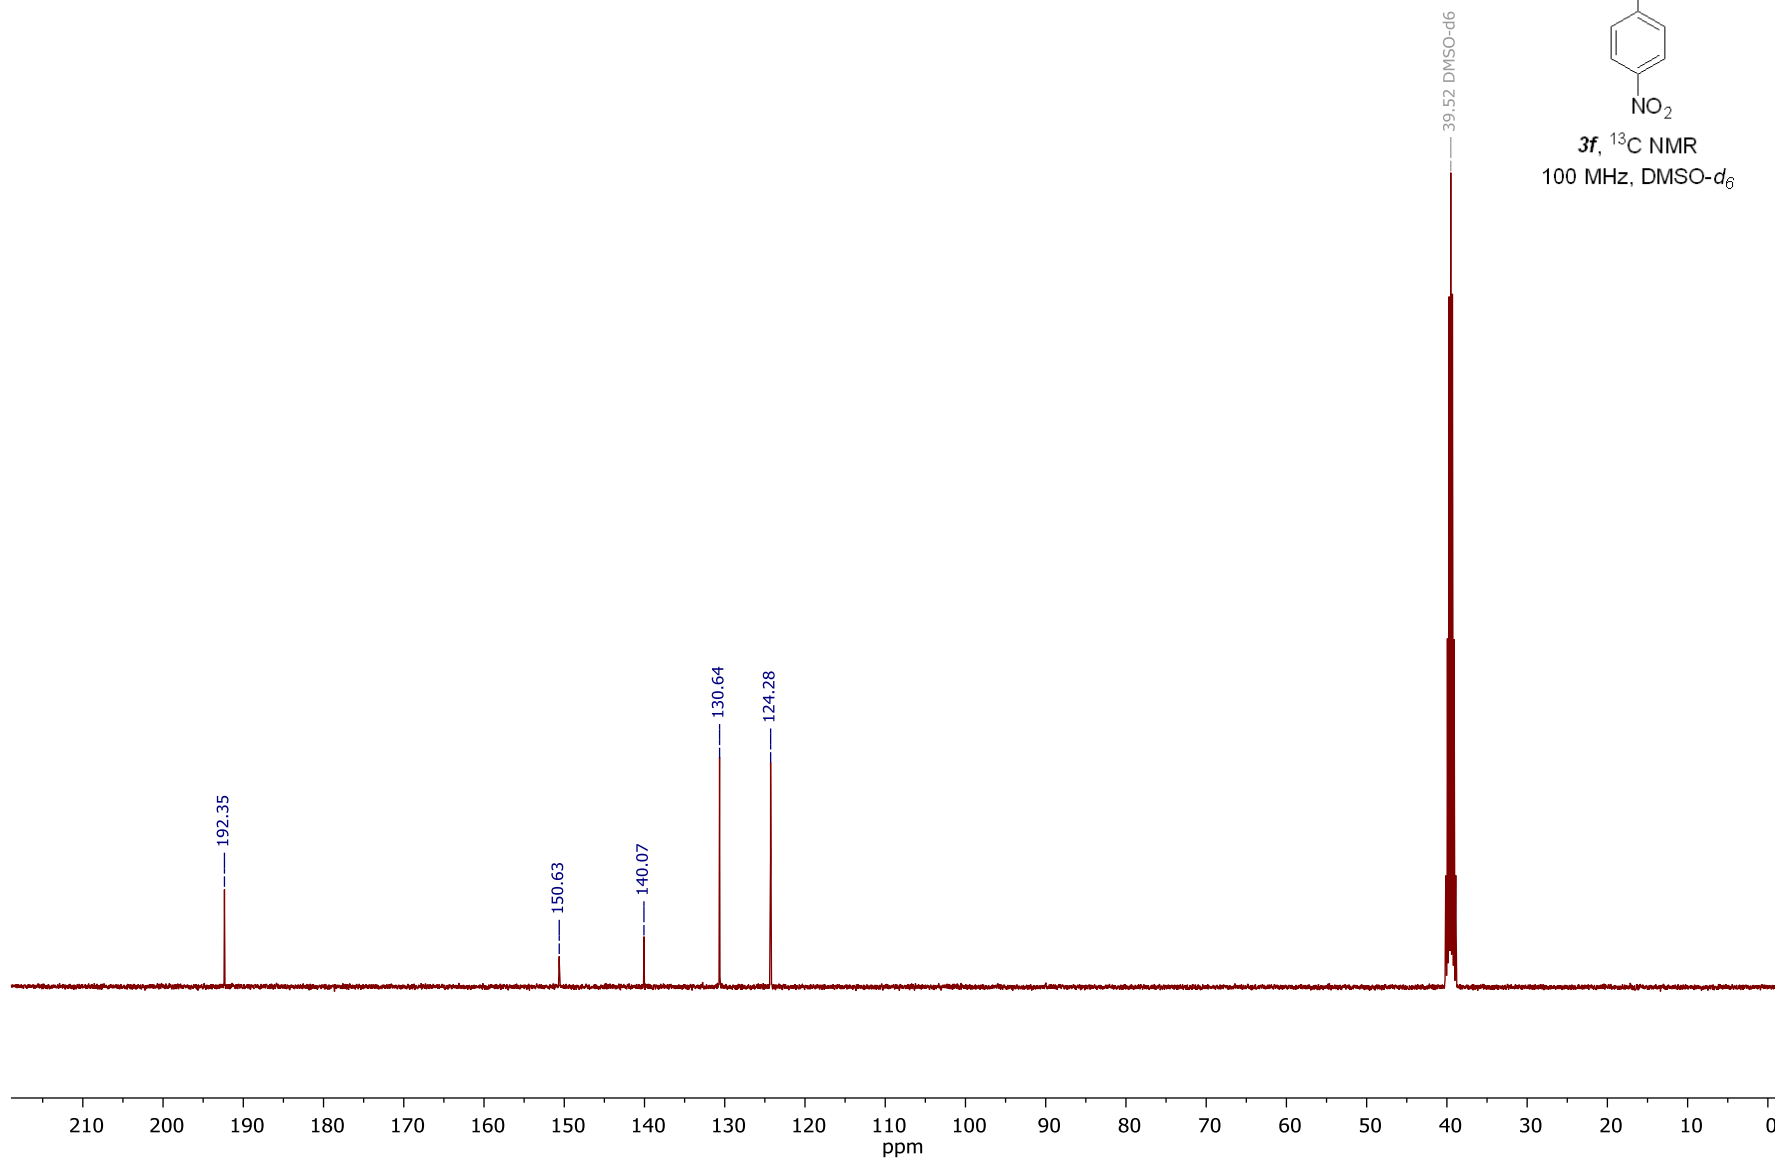



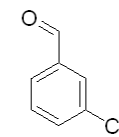

**3g**,  $^1\text{H}$  NMR  
400 MHz,  $\text{CDCl}_3$

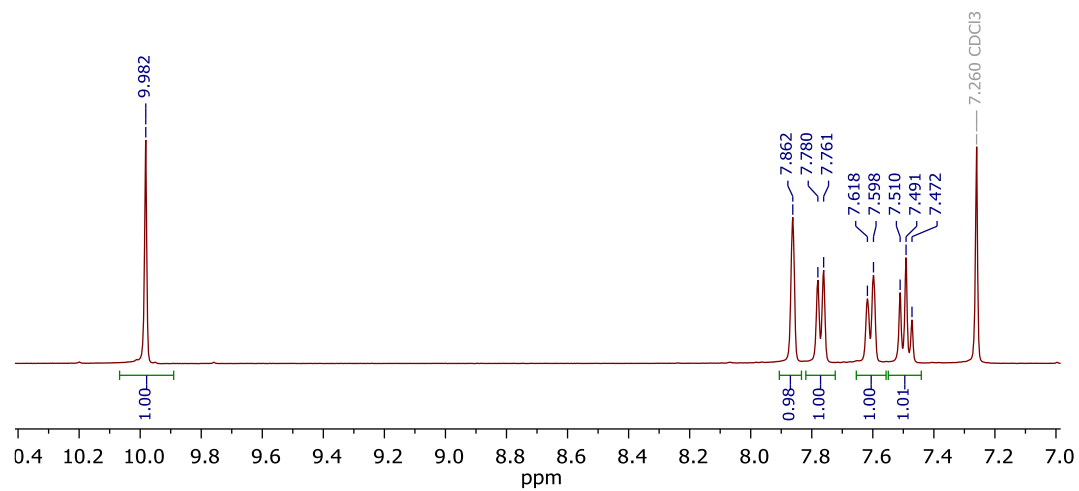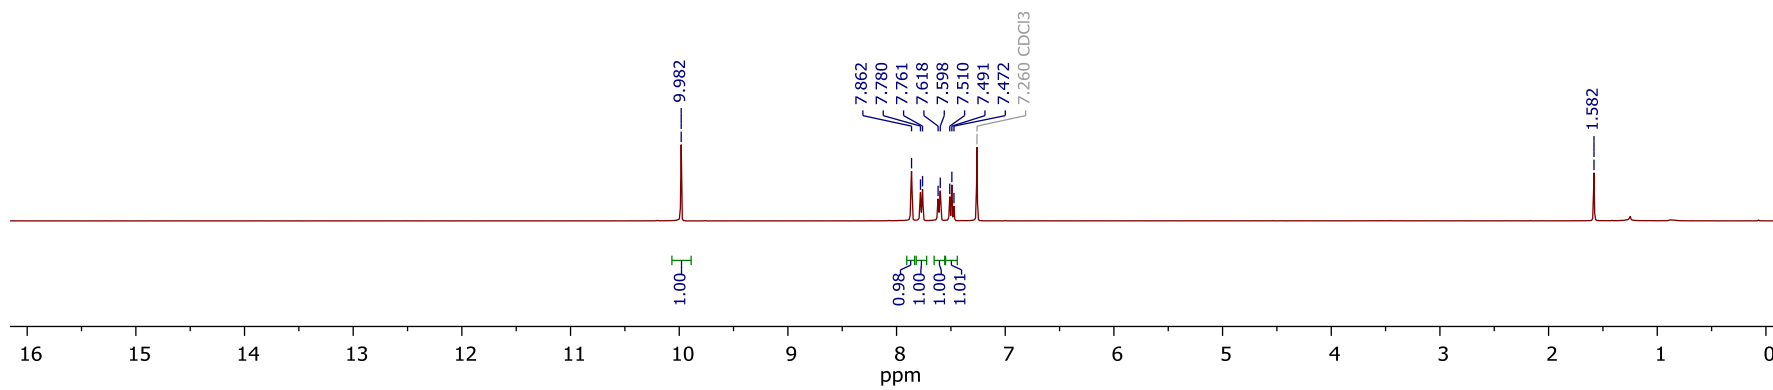

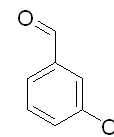

**3g**,  $^{13}\text{C}$  NMR  
100 MHz,  $\text{CDCl}_3$

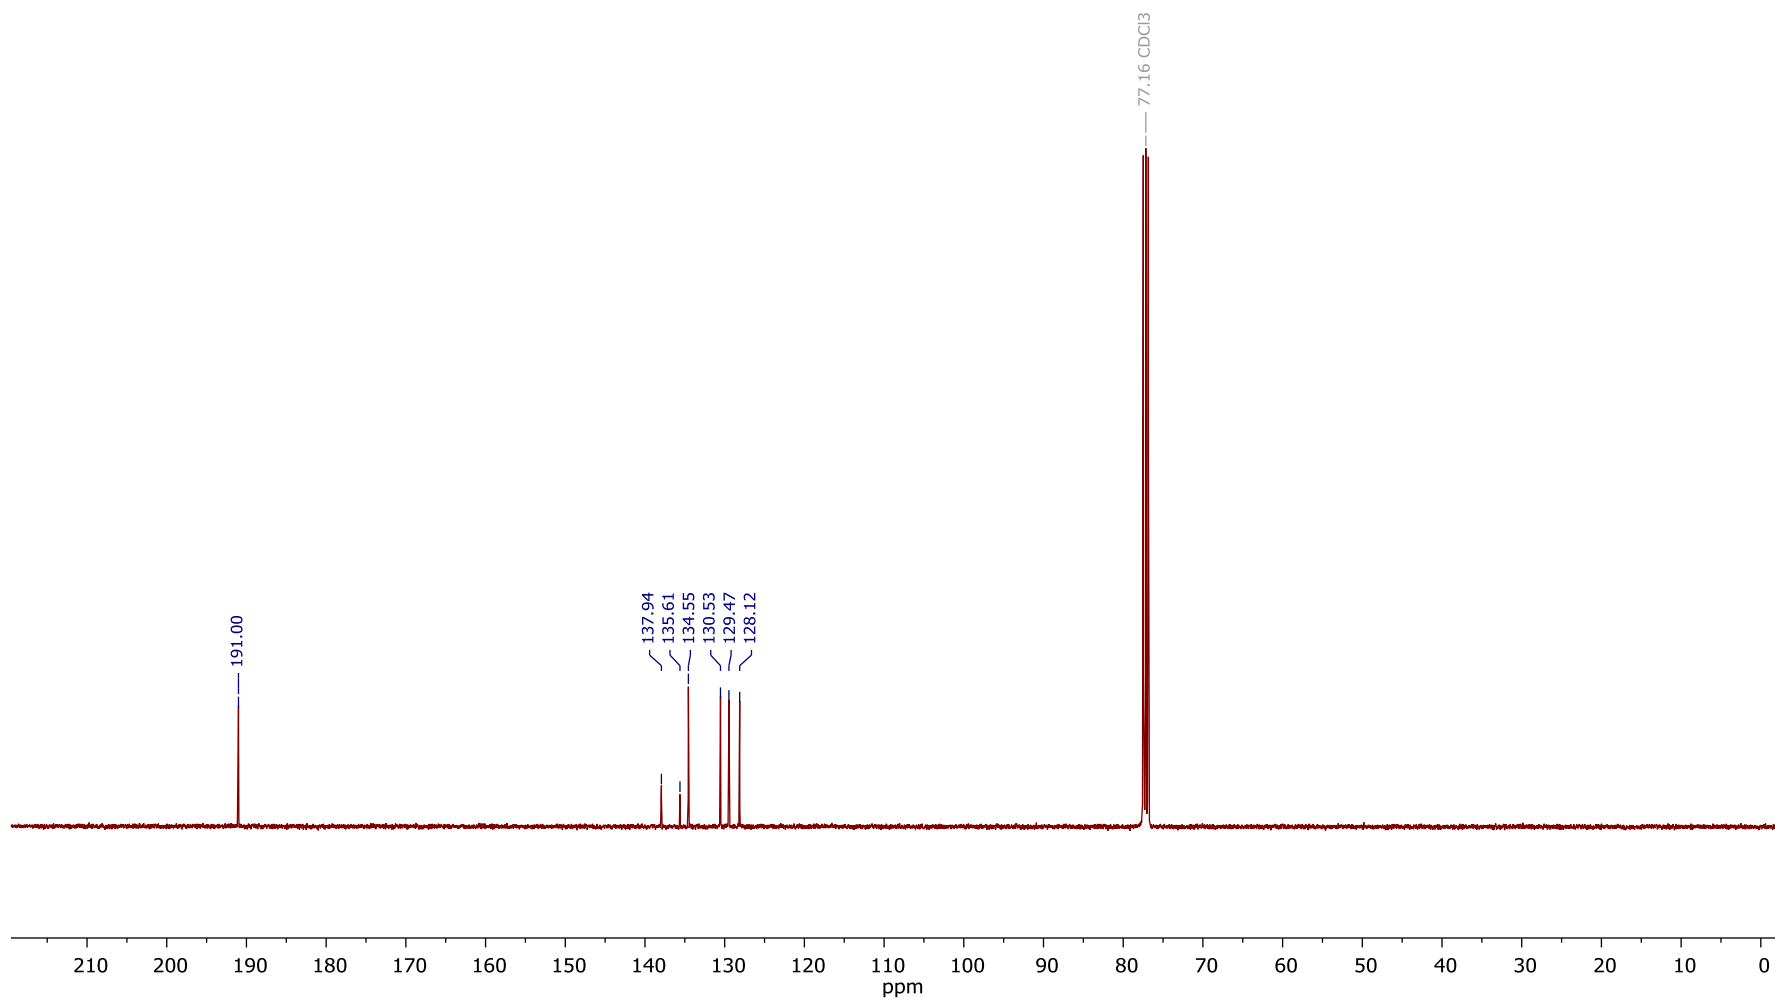

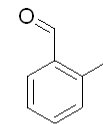

3h, <sup>1</sup>H NMR  
400 MHz, CDCl<sub>3</sub>

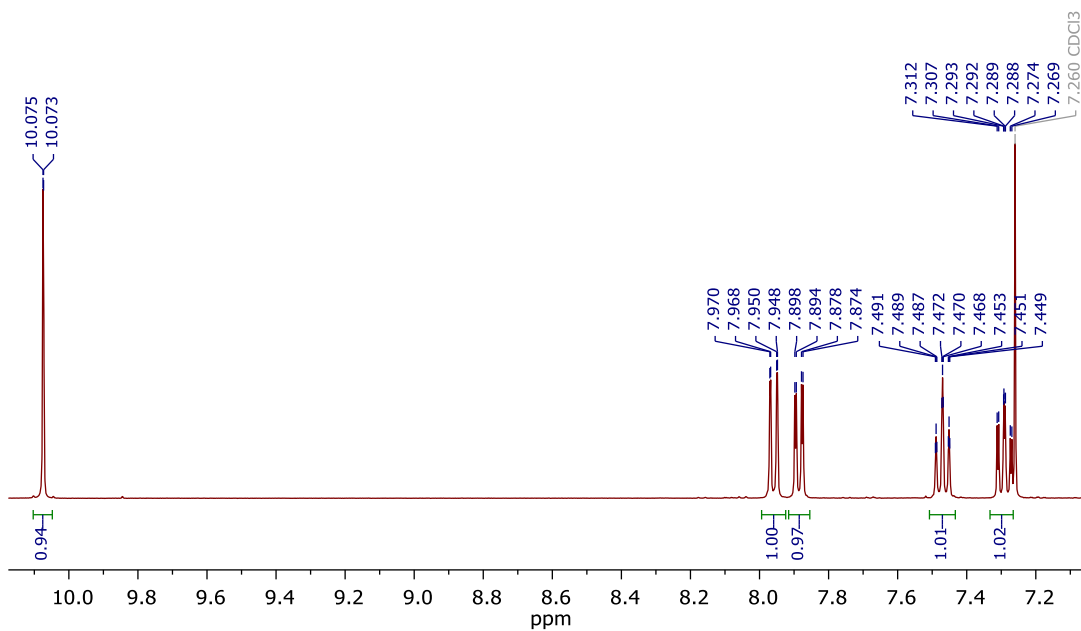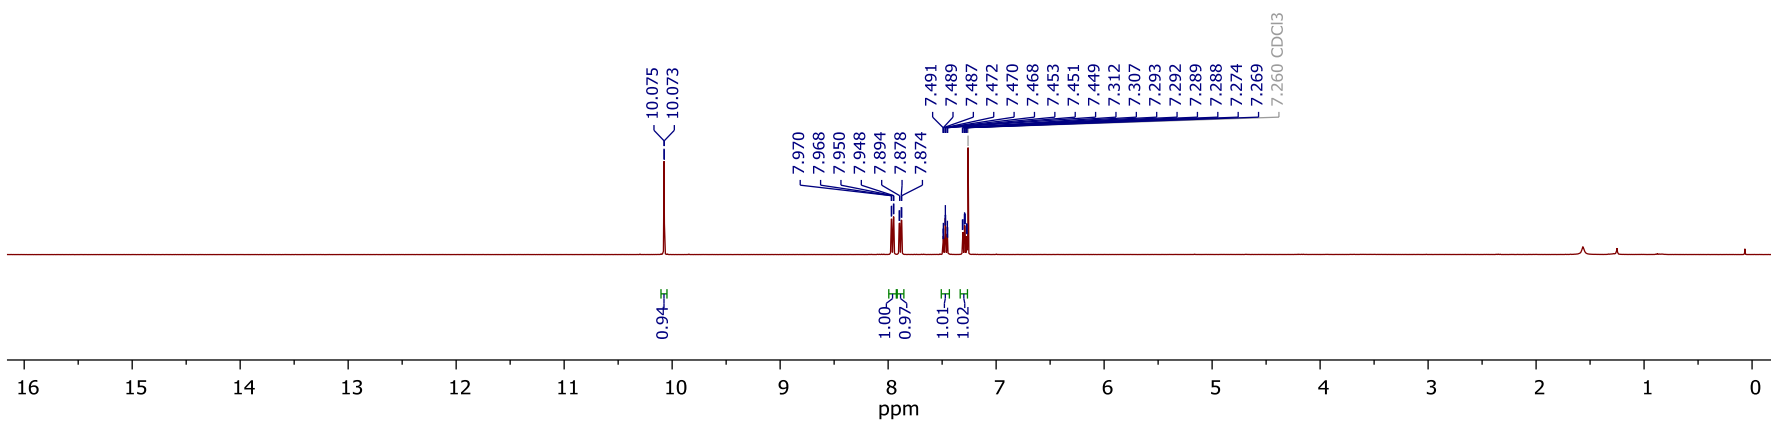

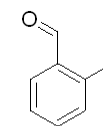

**3h**,  $^{13}\text{C}$  NMR  
100 MHz,  $\text{CDCl}_3$

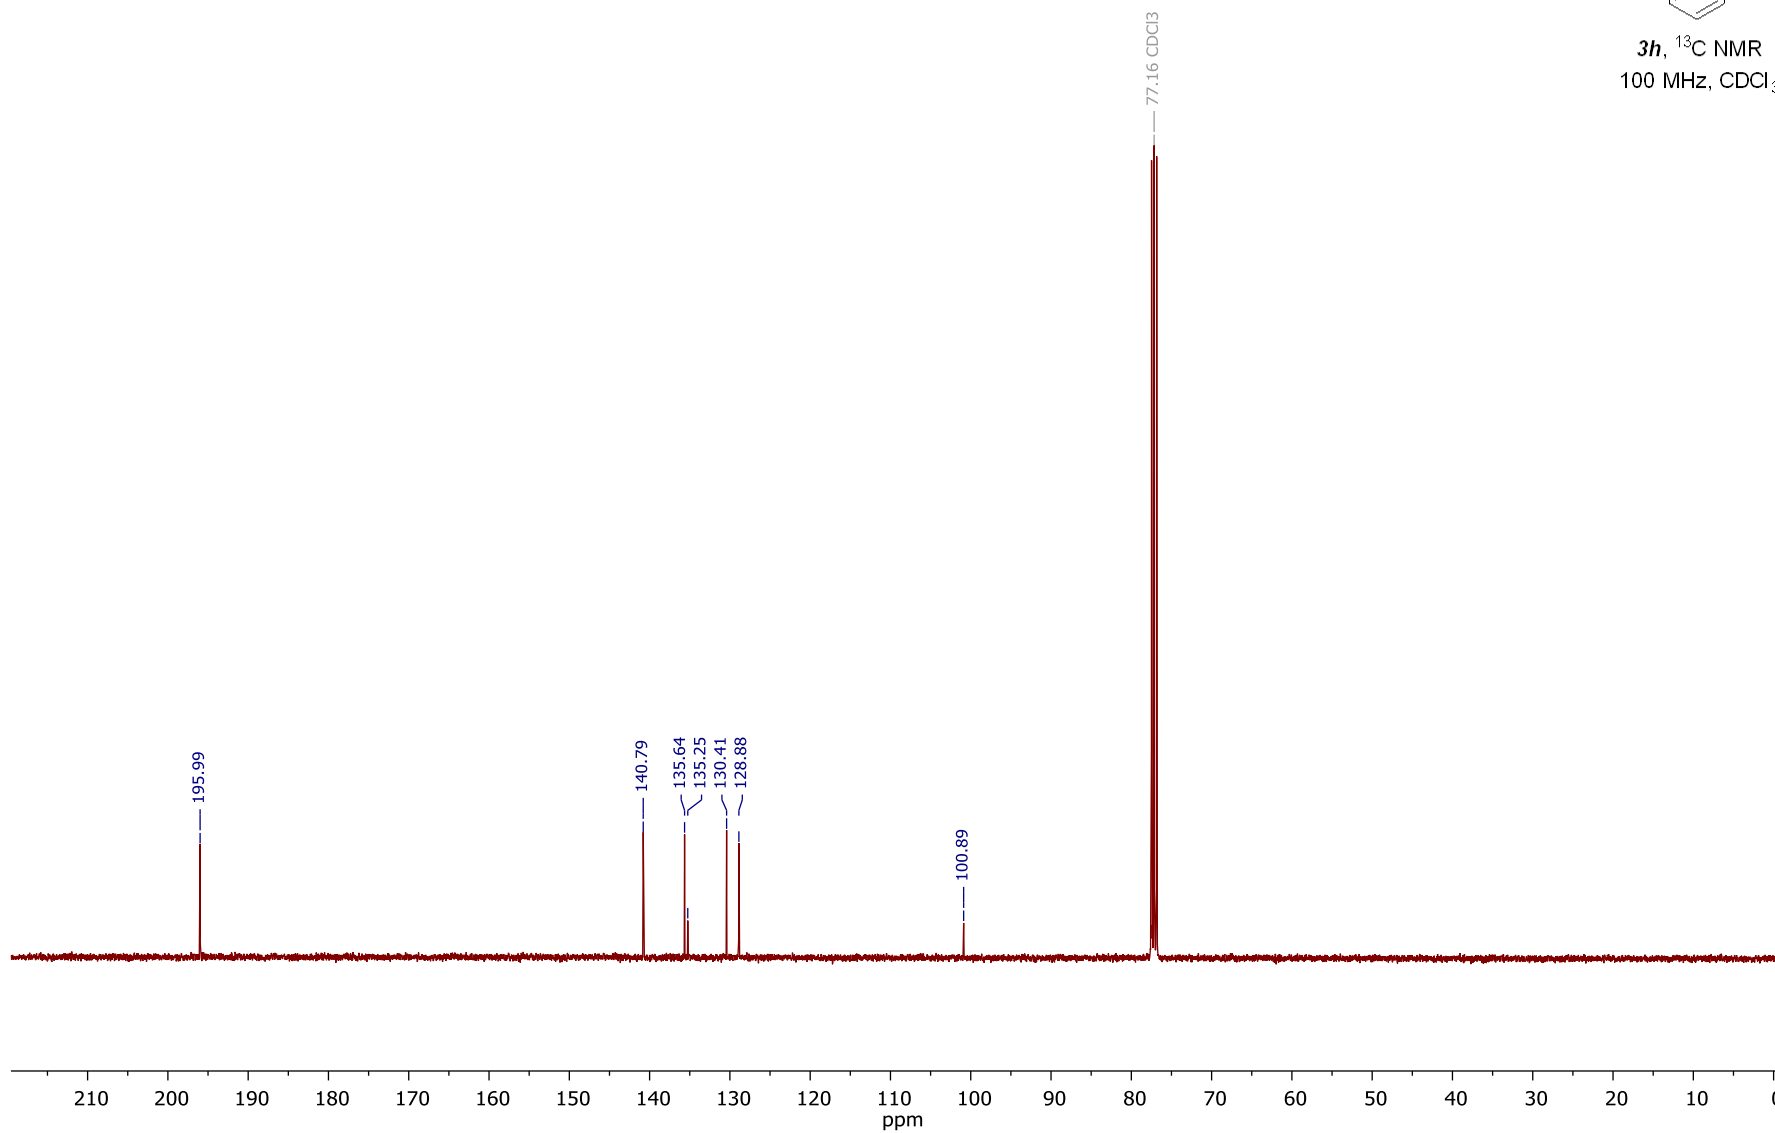

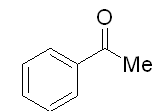

3i, <sup>1</sup>H NMR  
600 MHz, CDCl<sub>3</sub>

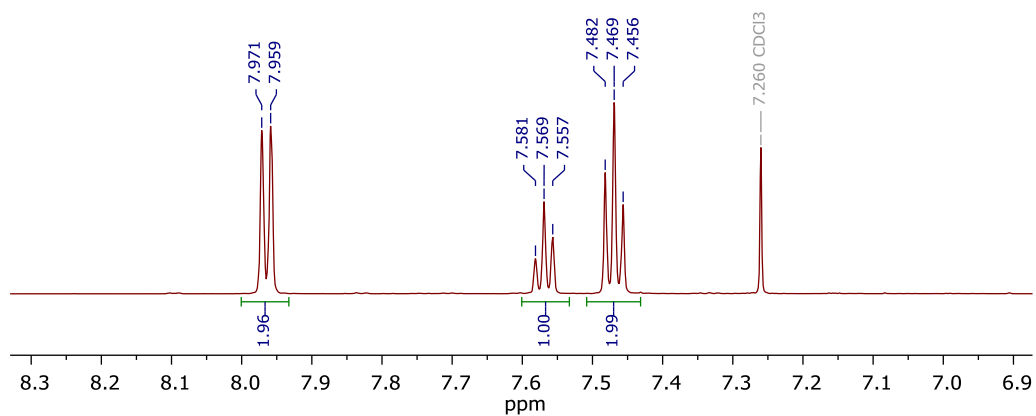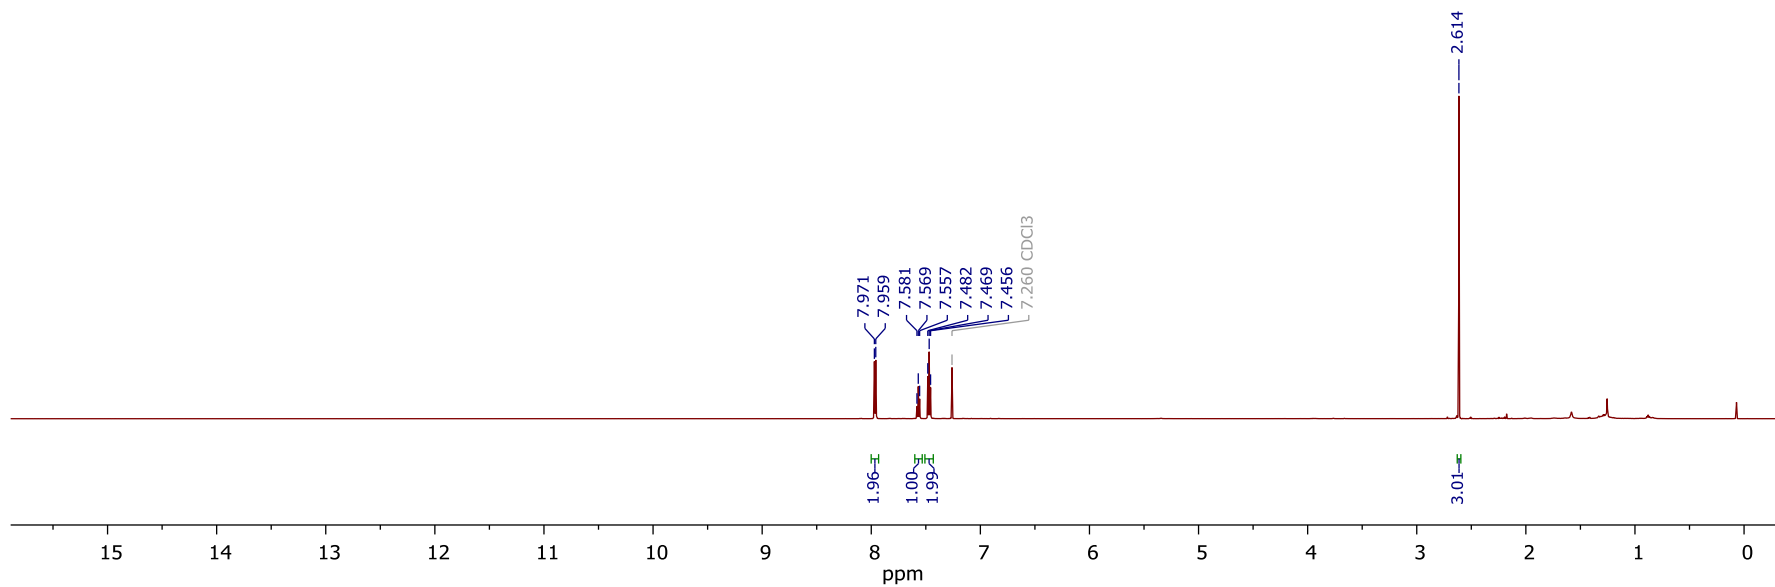

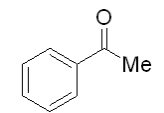

**3i**,  $^{13}\text{C}$  NMR  
150 MHz,  $\text{CDCl}_3$

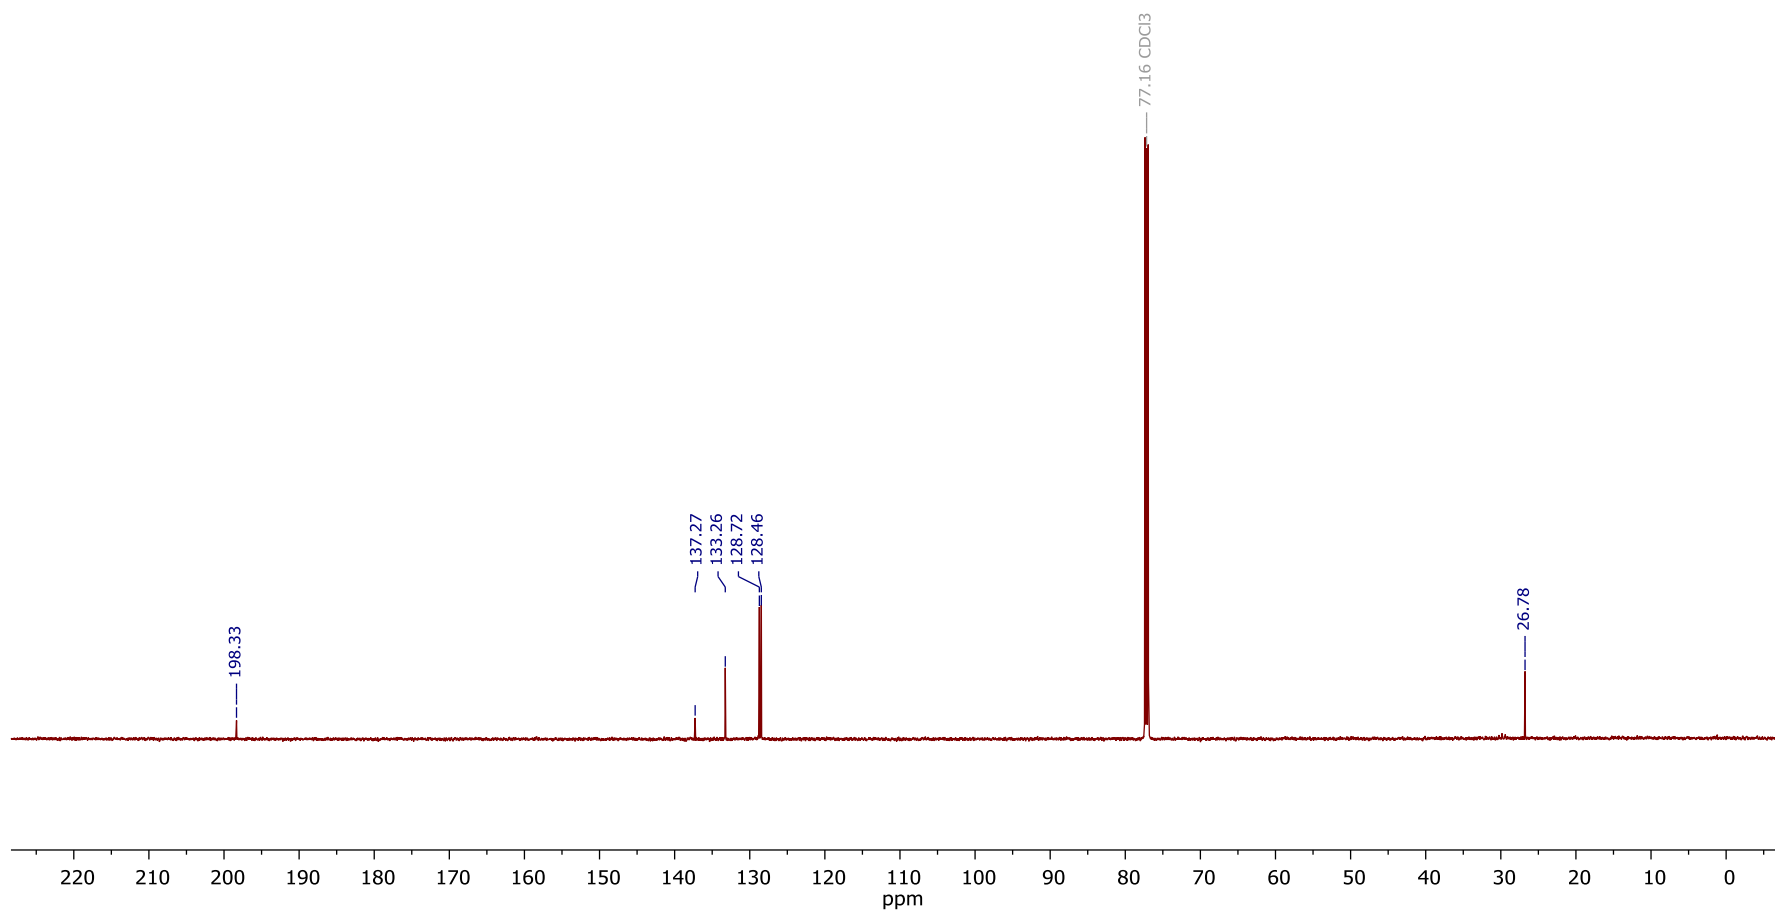

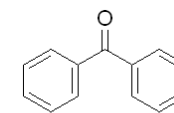

**3j**,  $^1\text{H}$  NMR  
400 MHz,  $\text{CDCl}_3$

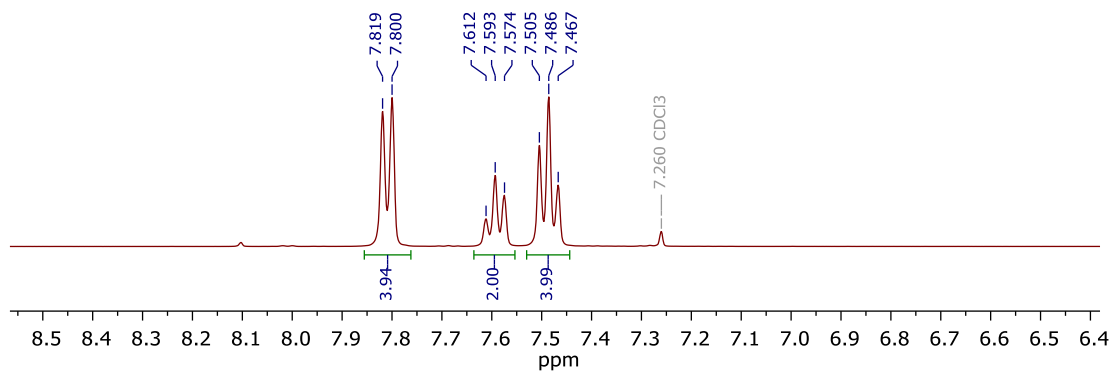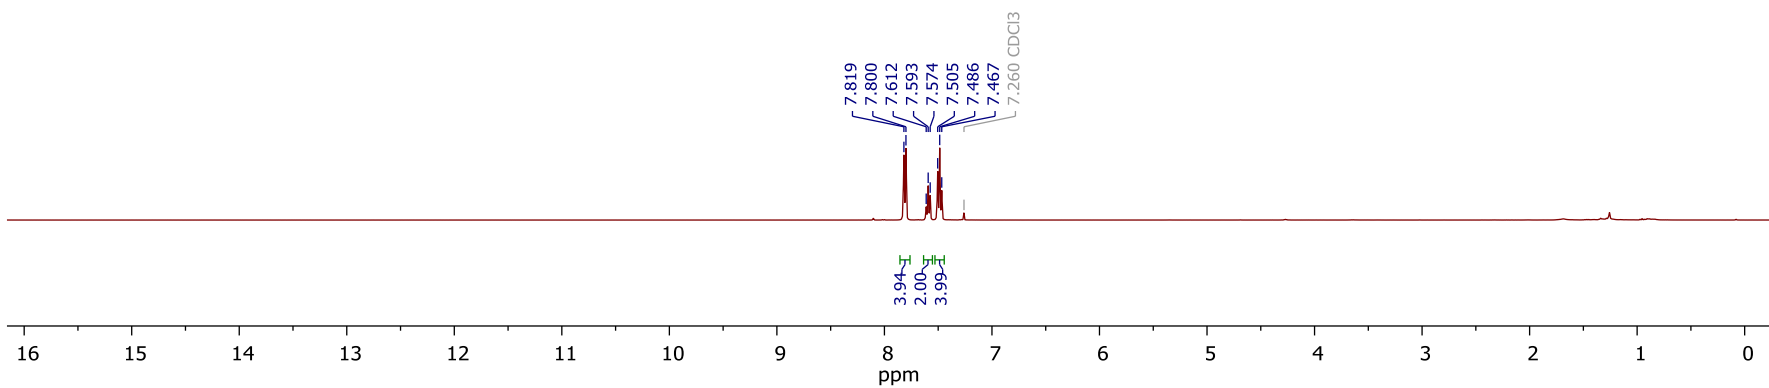

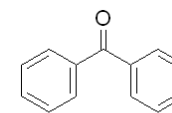

**3j**,  $^{13}\text{C}$  NMR  
100 MHz,  $\text{CDCl}_3$

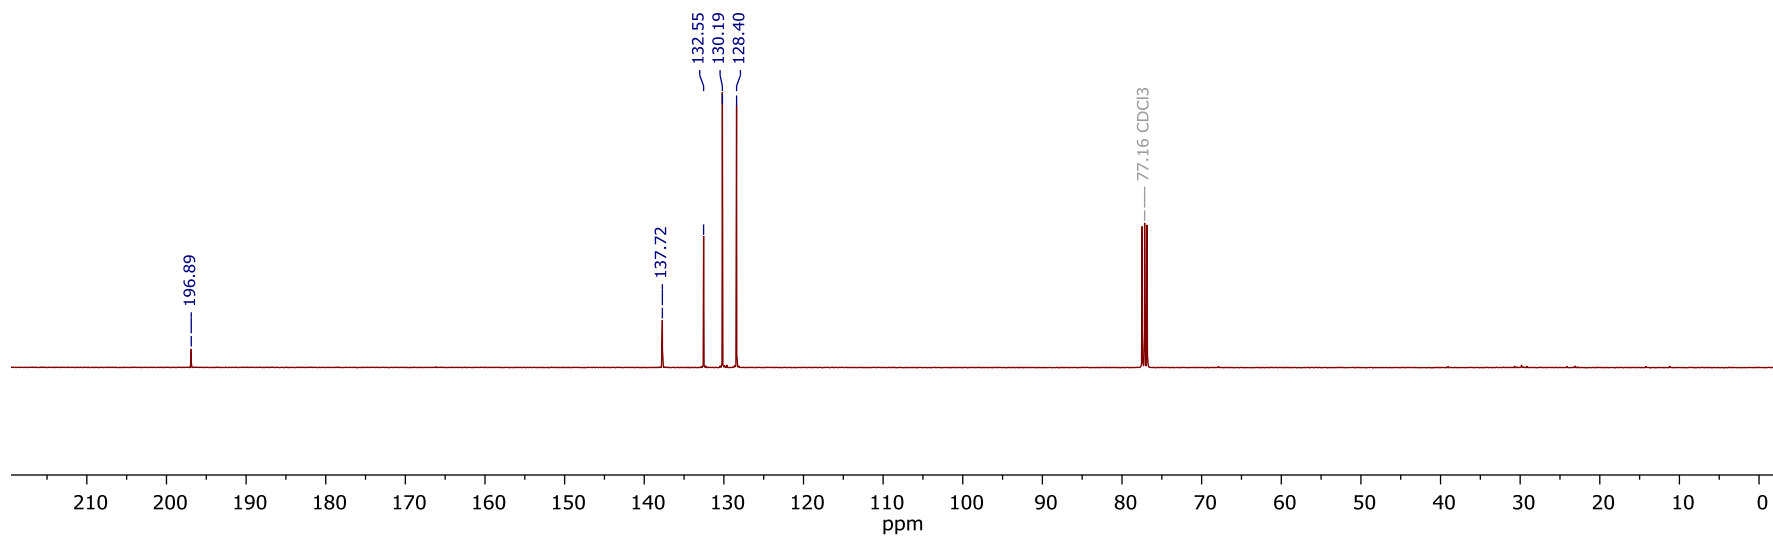



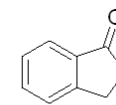

3k,  $^1\text{H}$  NMR  
400 MHz,  $\text{DMSO-}d_6$

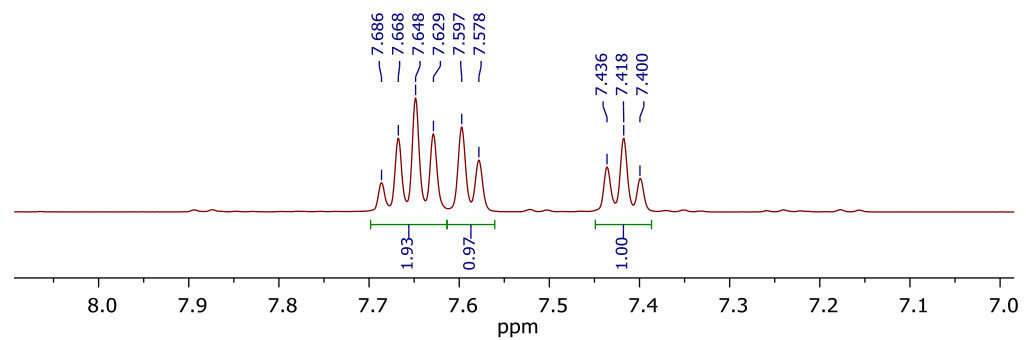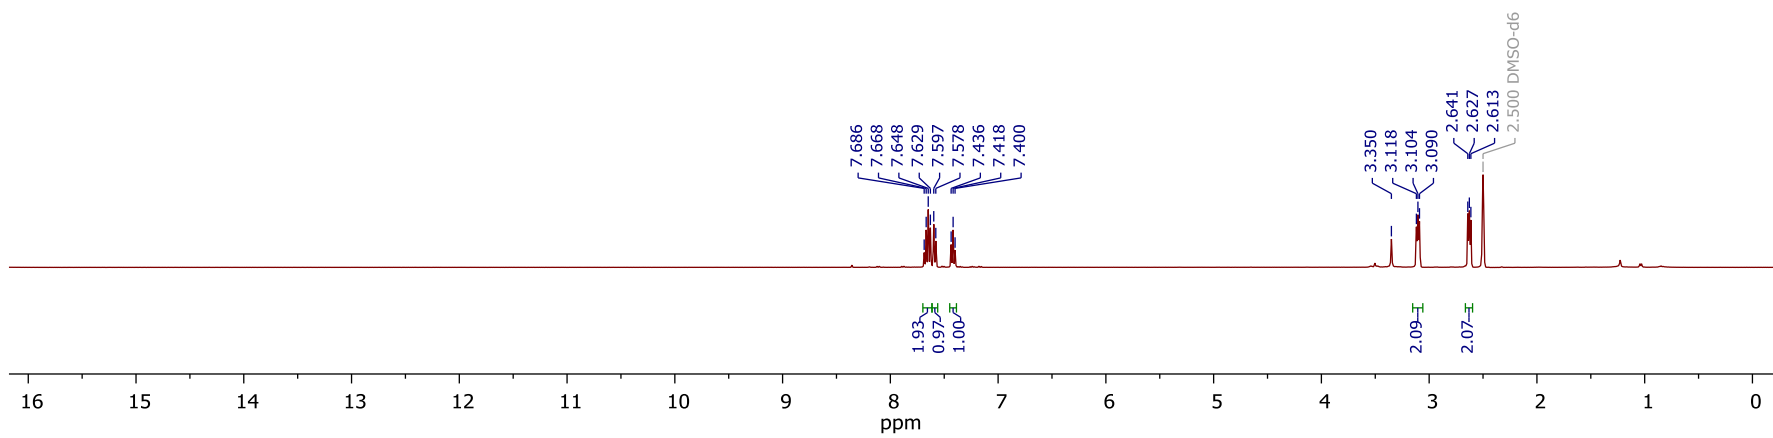



**3k**,  $^{13}\text{C}$  NMR  
100 MHz,  $\text{DMSO-}d_6$

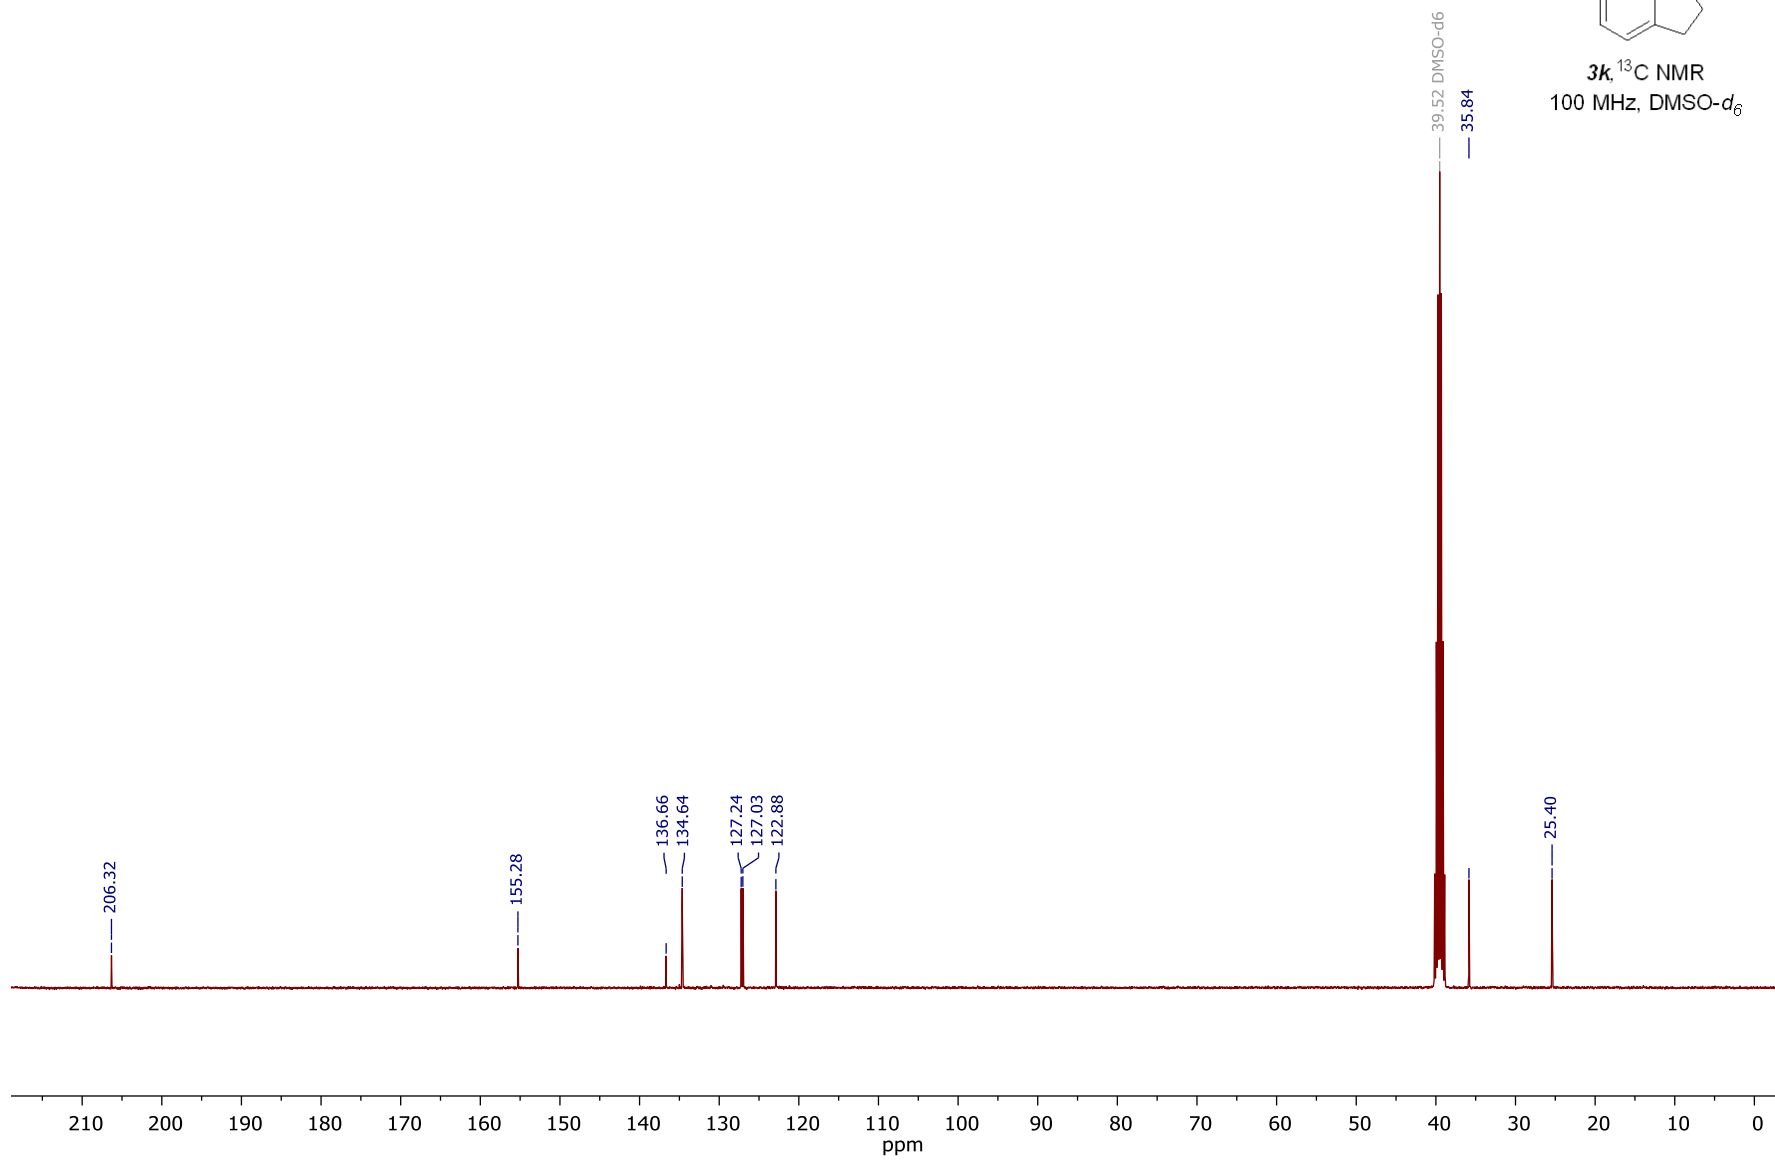

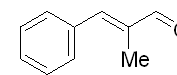

3l, <sup>1</sup>H NMR  
400 MHz, DMSO-d<sub>6</sub>

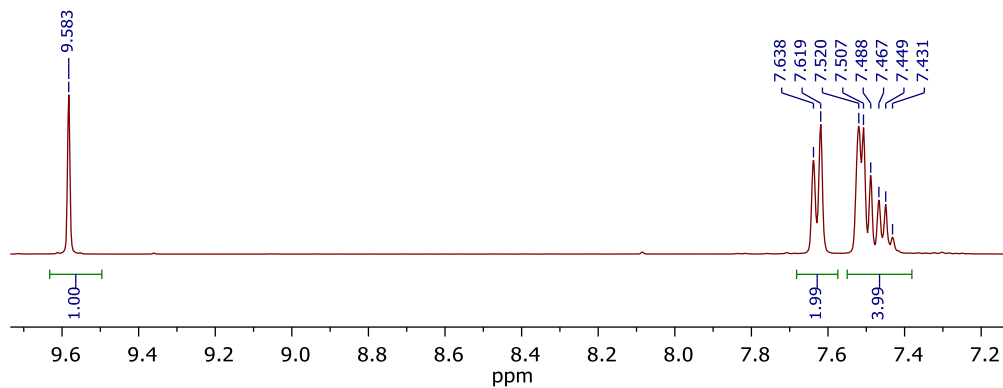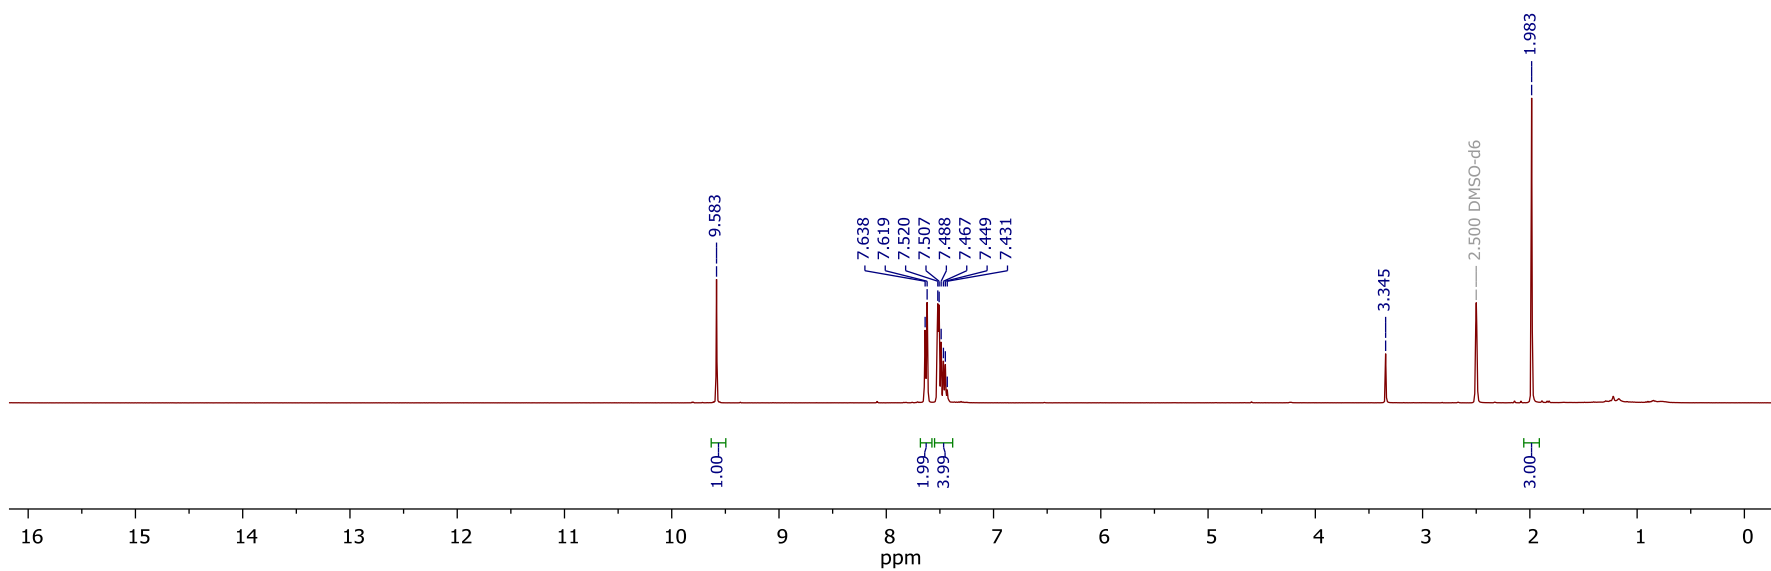

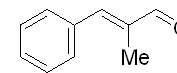

**3I**,  $^{13}\text{C}$  NMR  
100 MHz,  $\text{DMSO-}d_6$

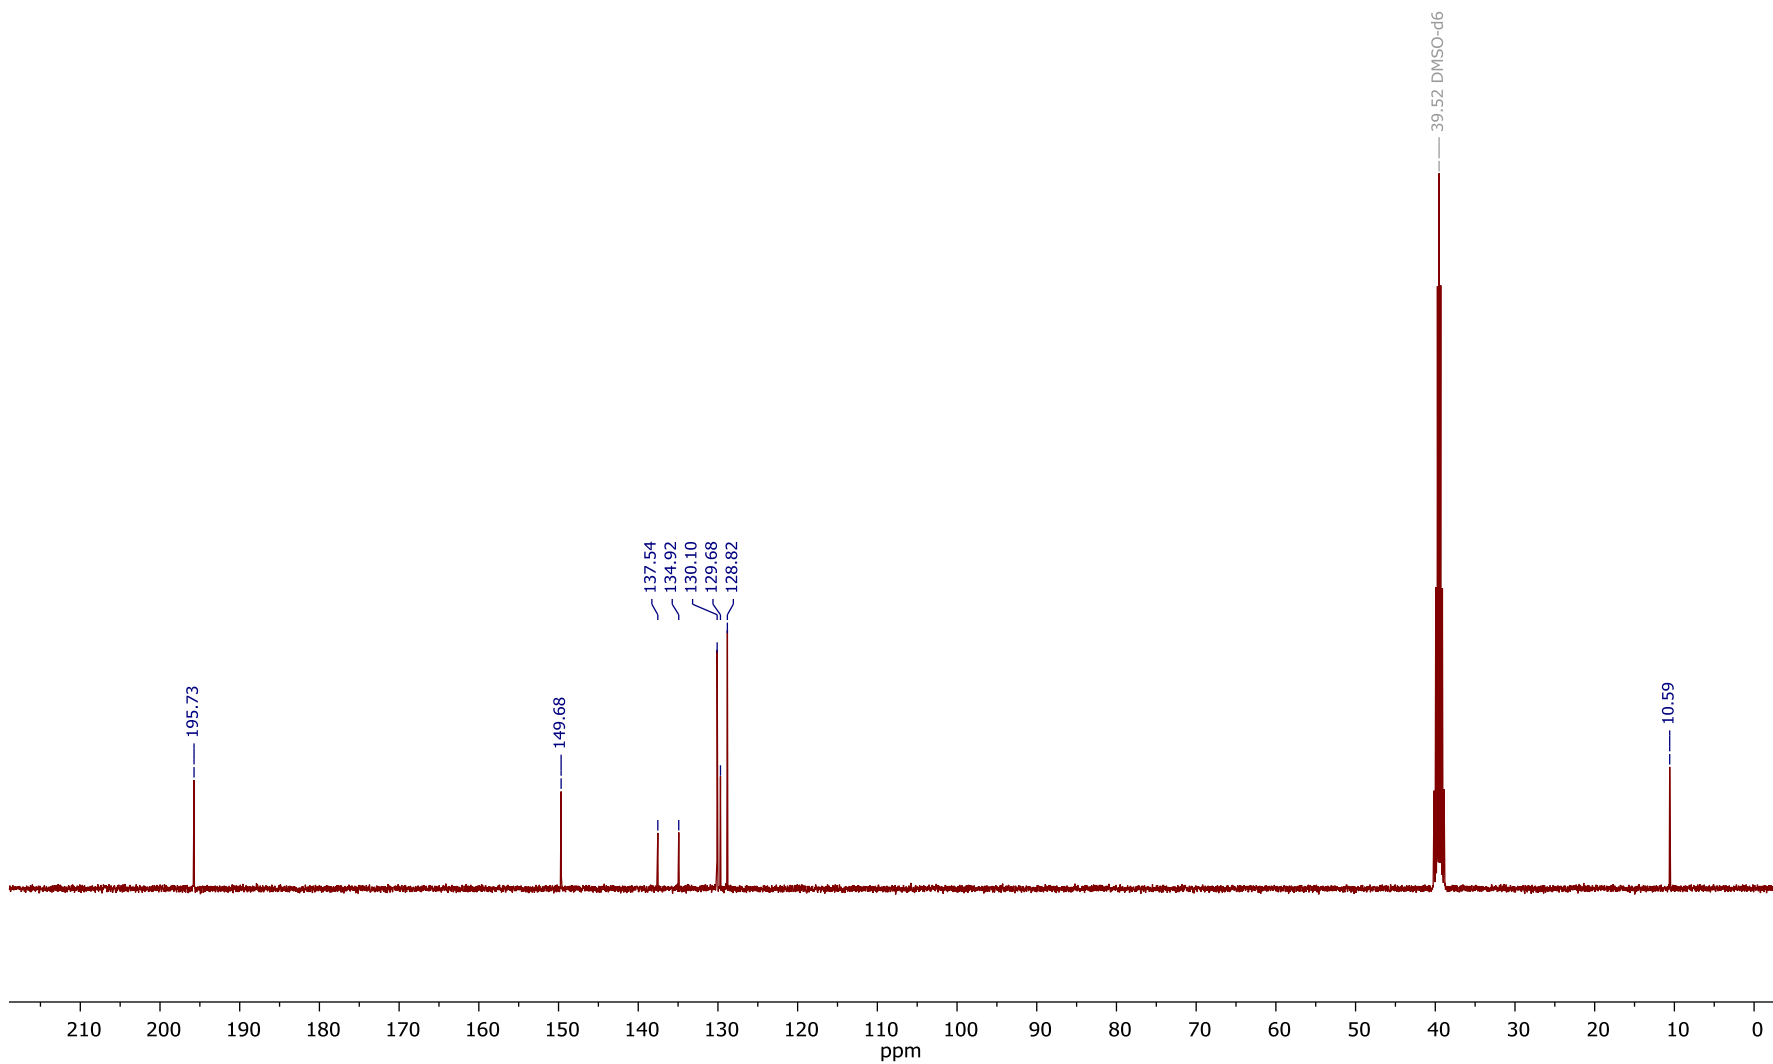

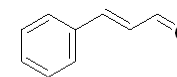

**3m**,  $^1\text{H}$  NMR  
400 MHz,  $\text{CDCl}_3$   
NMR yield

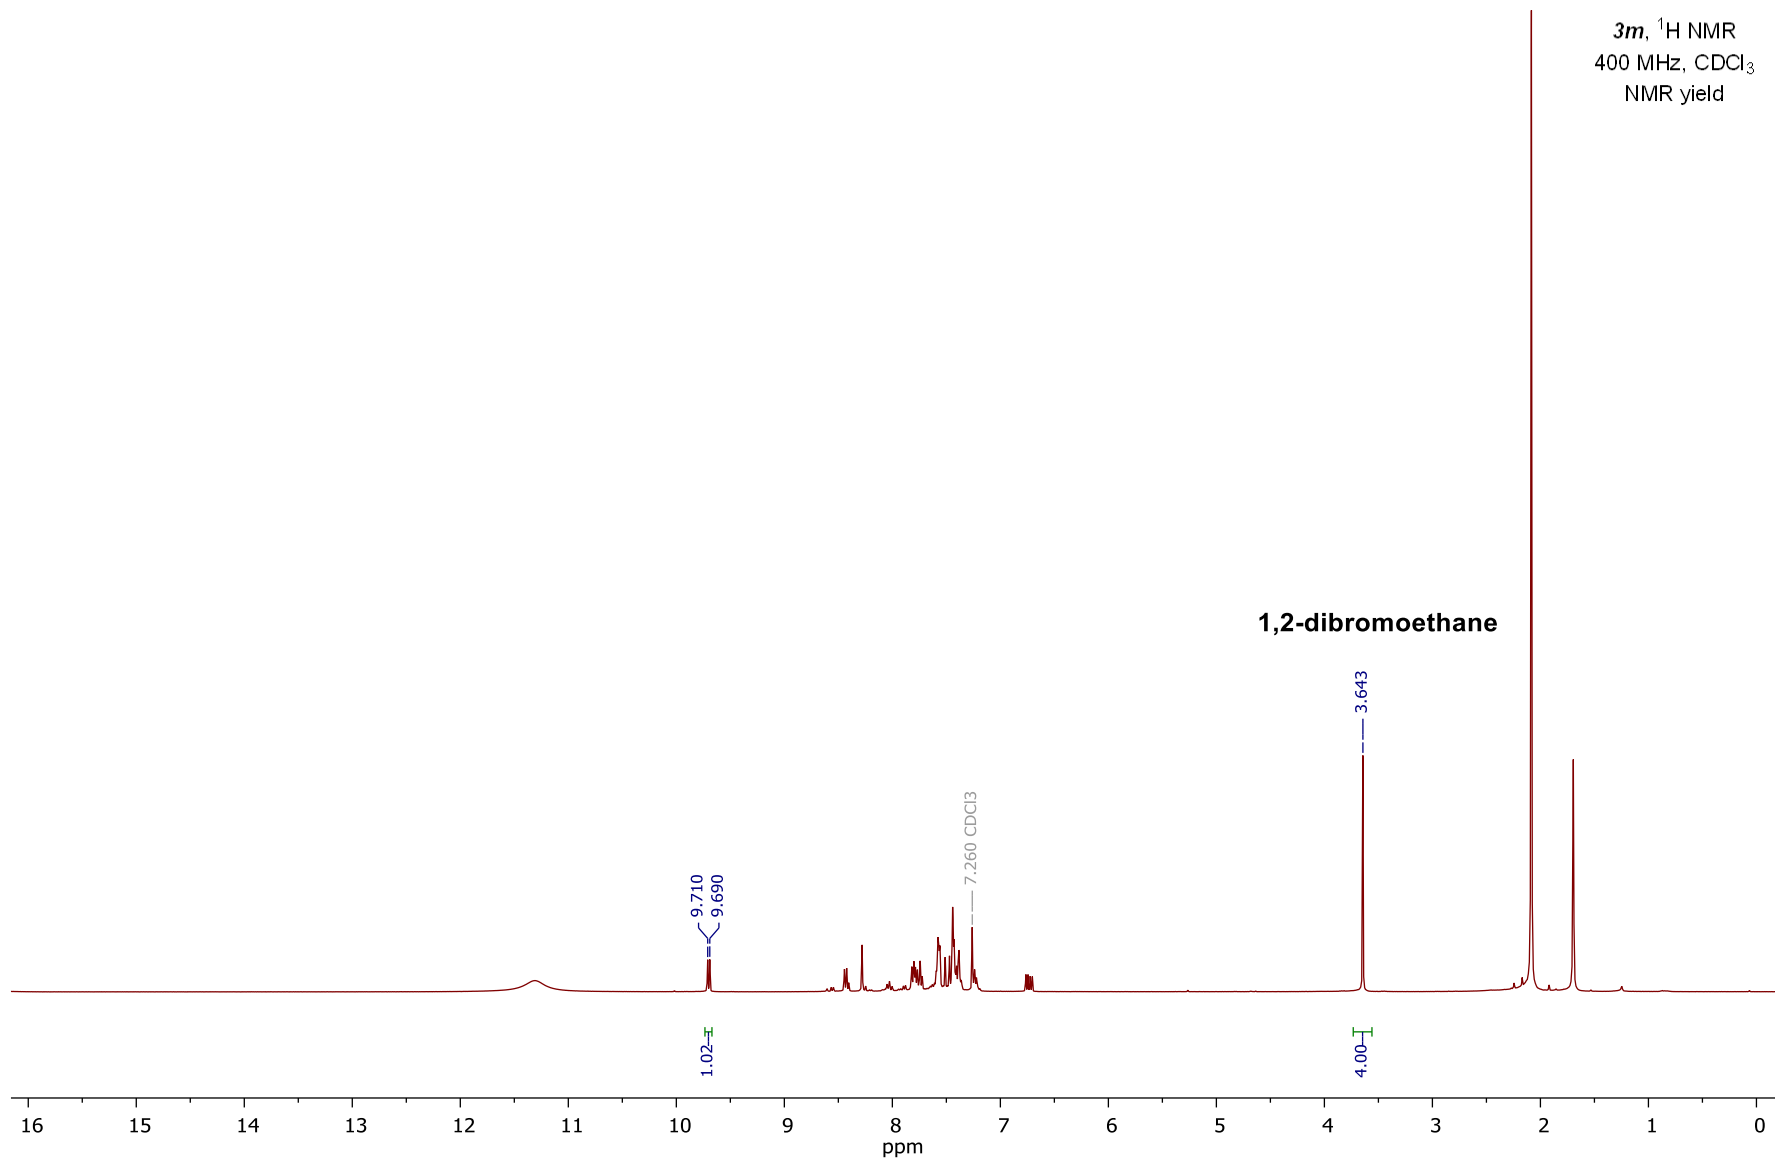

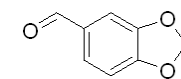

**3n**,  $^1\text{H}$  NMR  
400 MHz,  $\text{CDCl}_3$

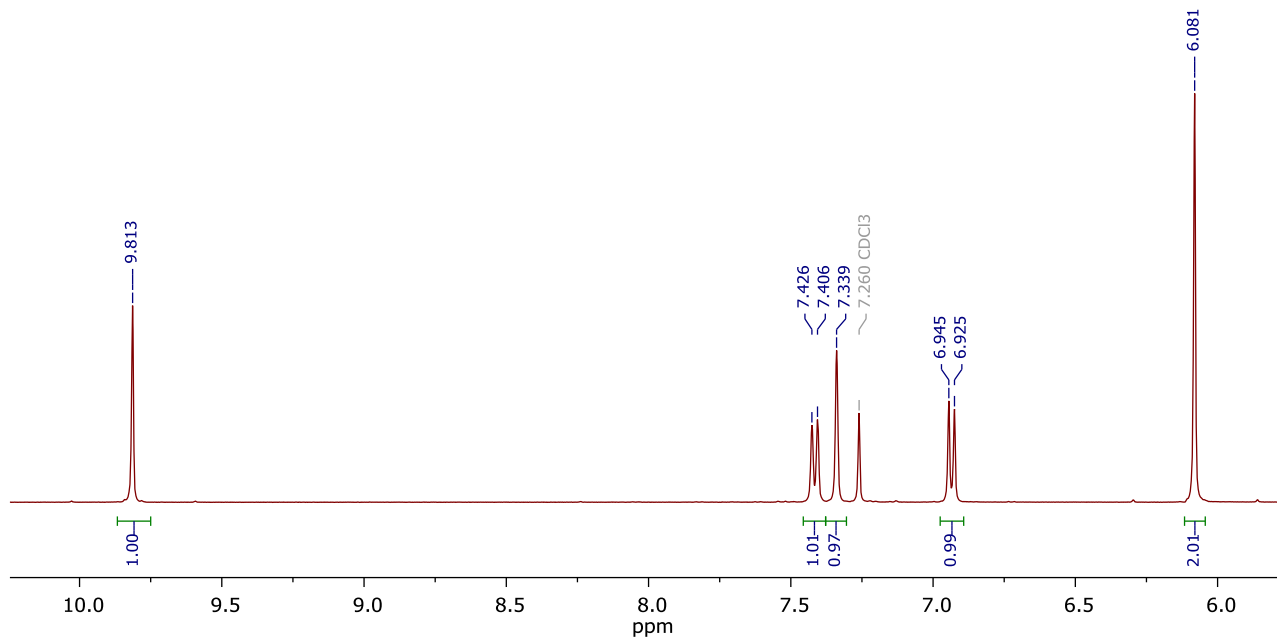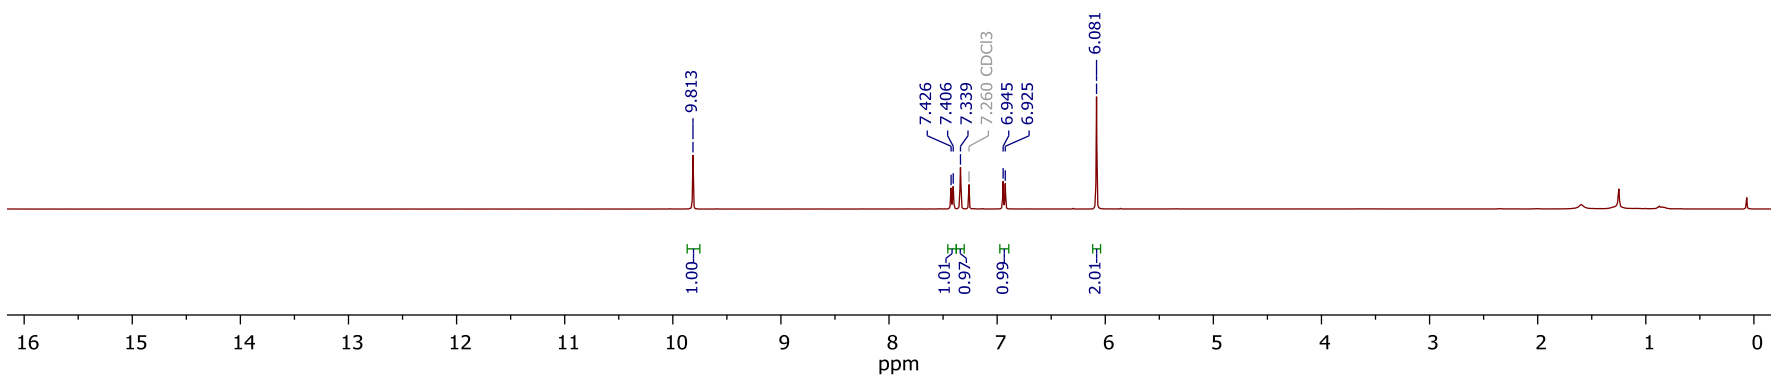

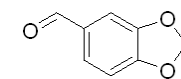

**3n**,  $^{13}\text{C}$  NMR  
100 MHz,  $\text{CDCl}_3$

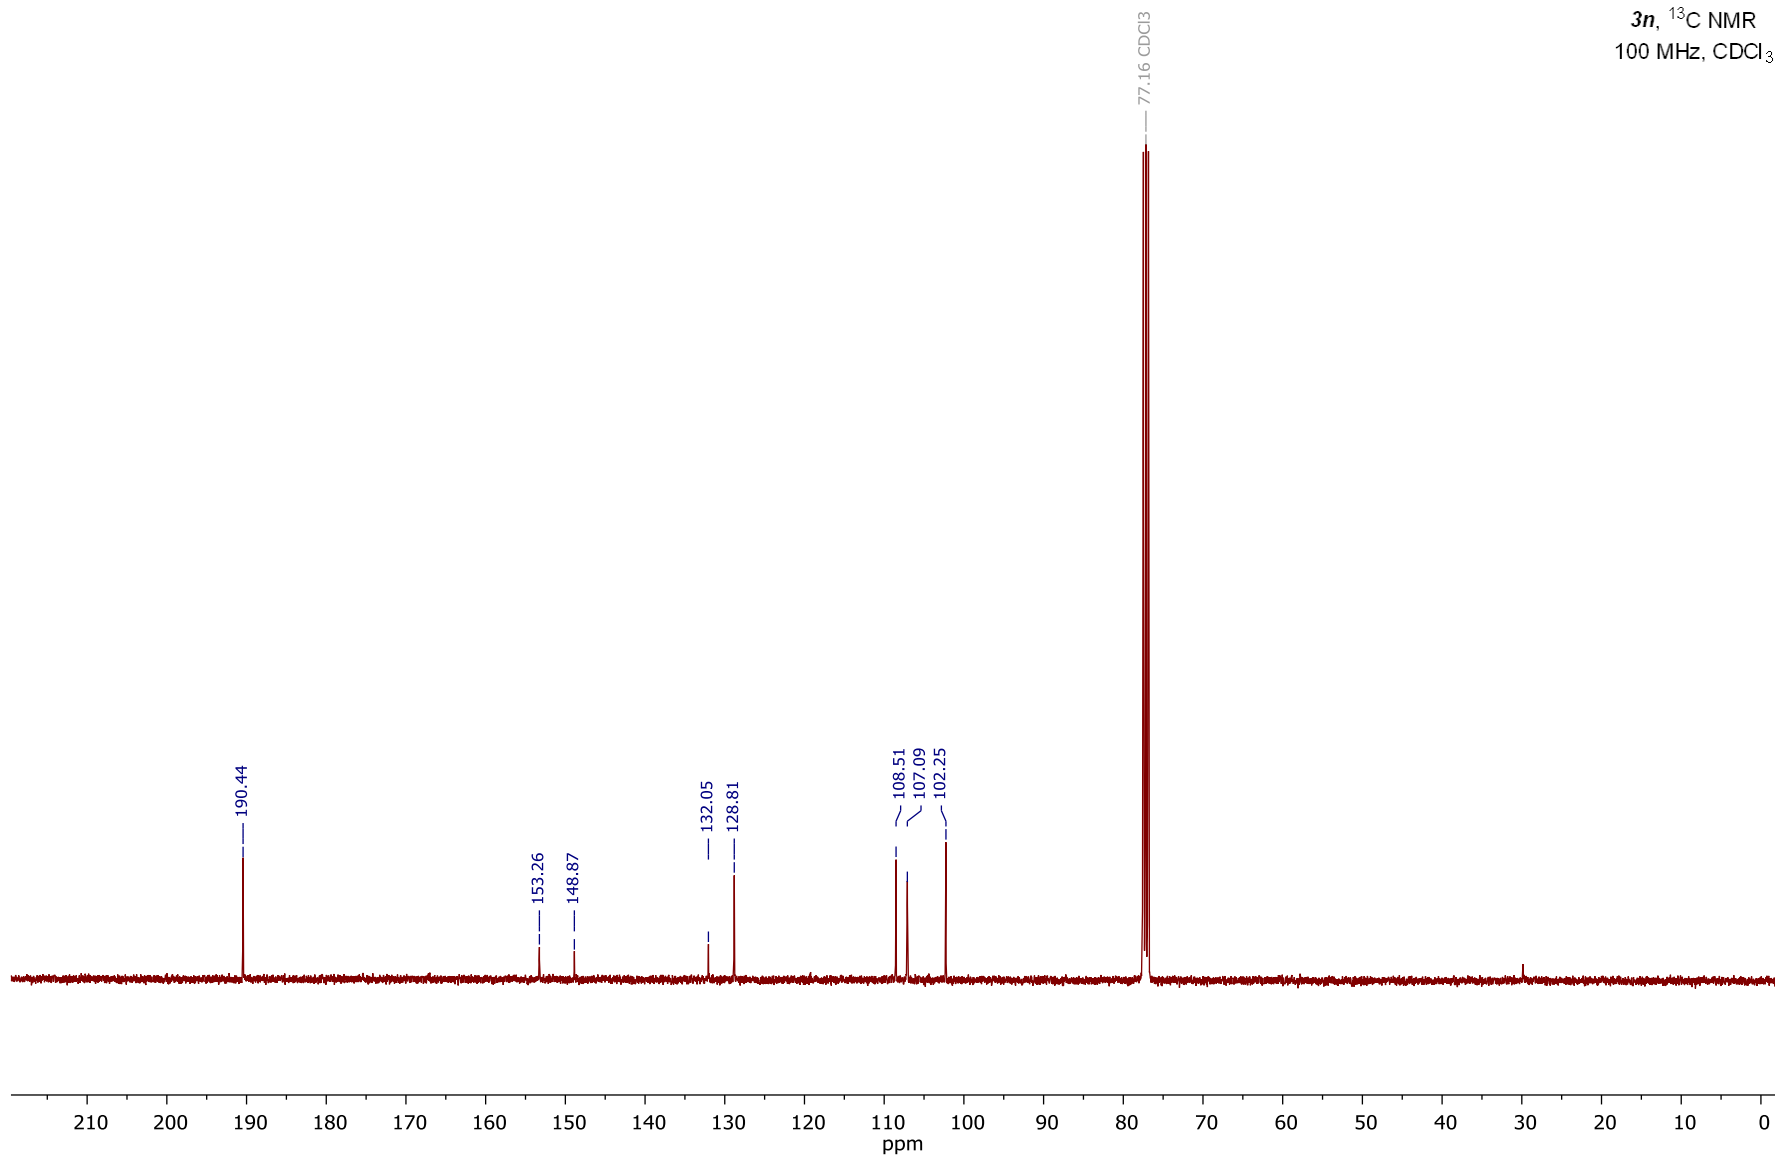

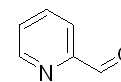

3o, <sup>1</sup>H NMR  
400 MHz, CDCl<sub>3</sub>  
NMR yield

1,2-dibromoethane

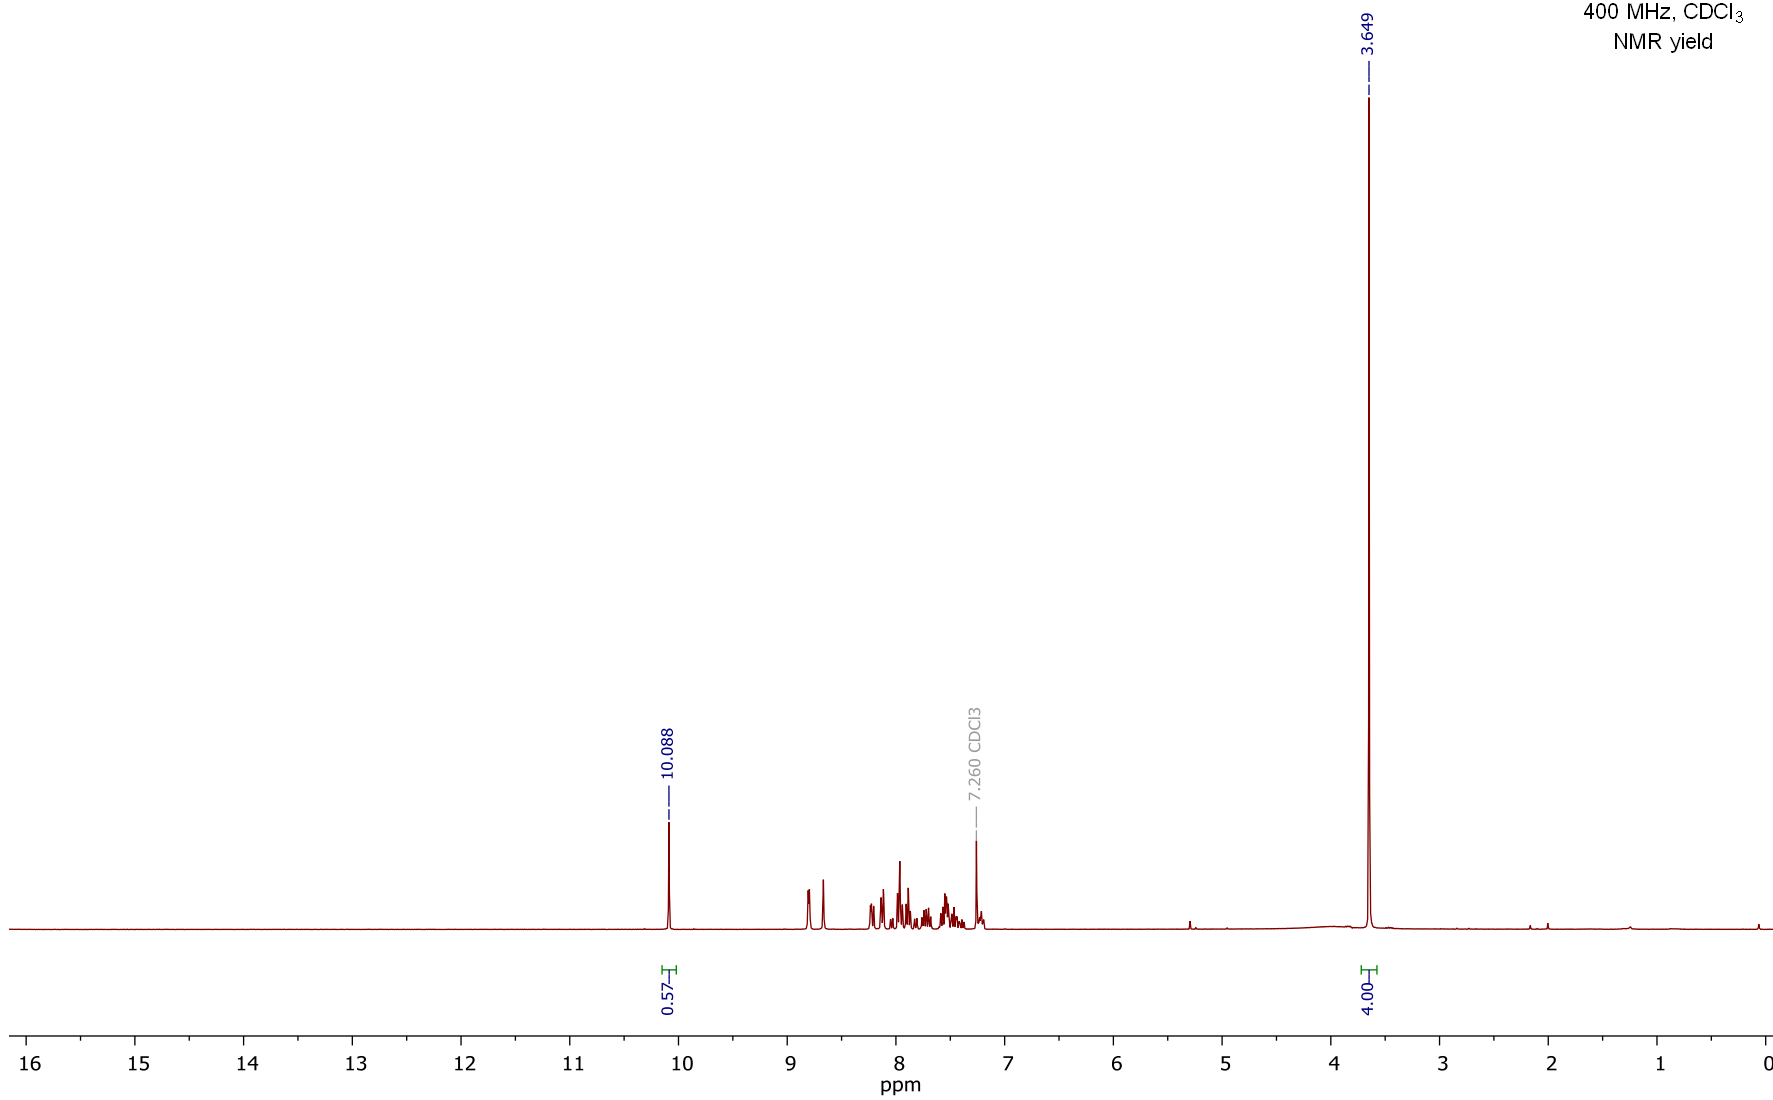



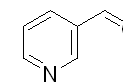

3p, <sup>1</sup>H NMR  
600 MHz, CDCl<sub>3</sub>

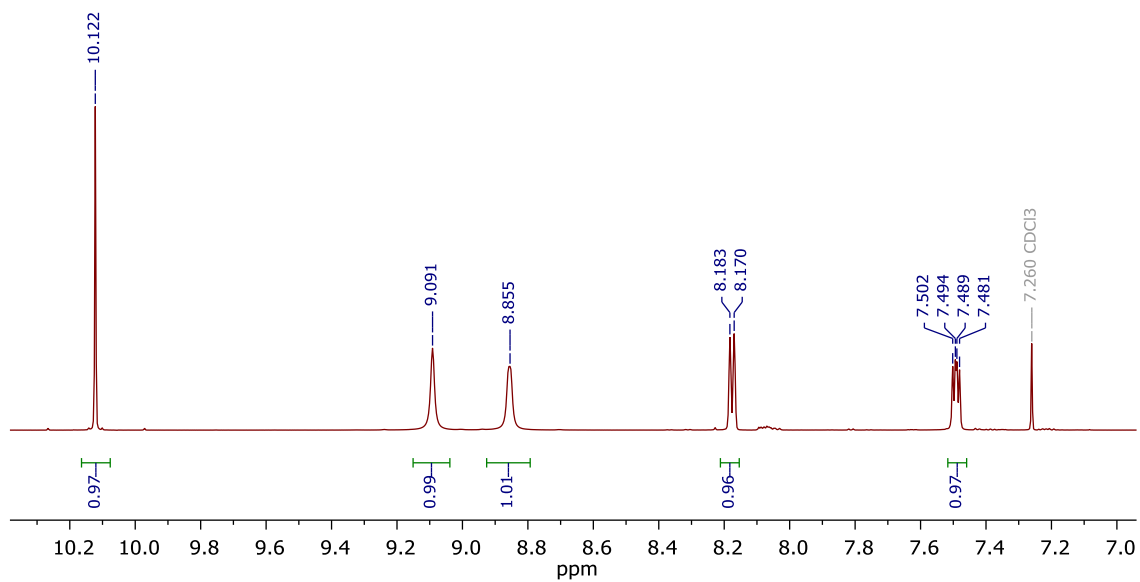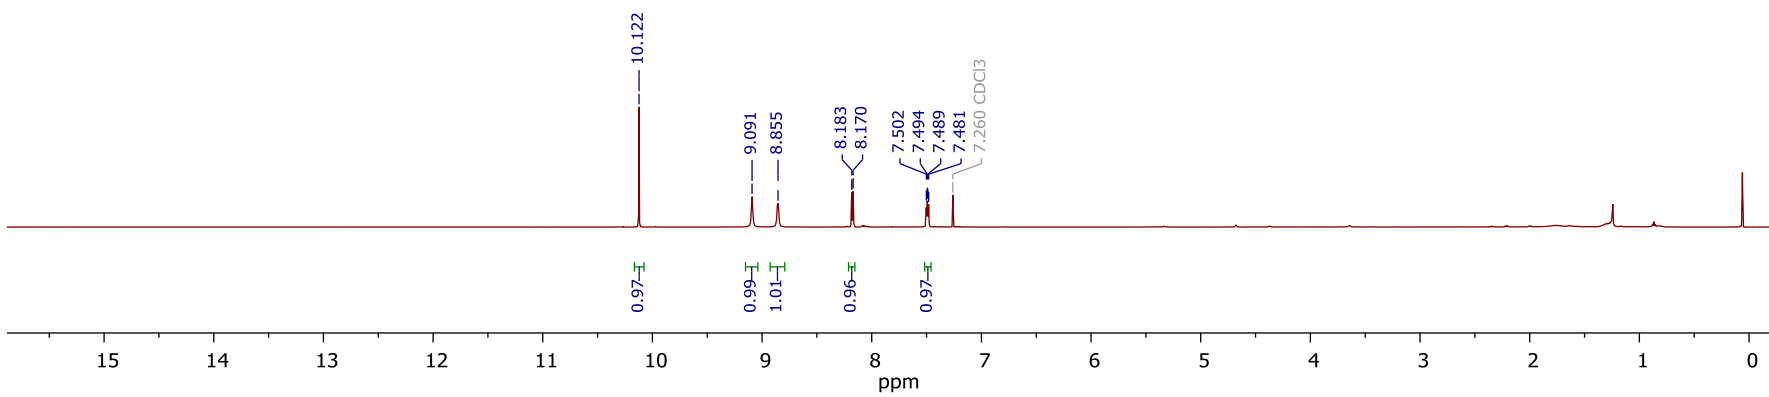

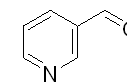

**3p**,  $^{13}\text{C}$  NMR  
150 MHz,  $\text{CDCl}_3$

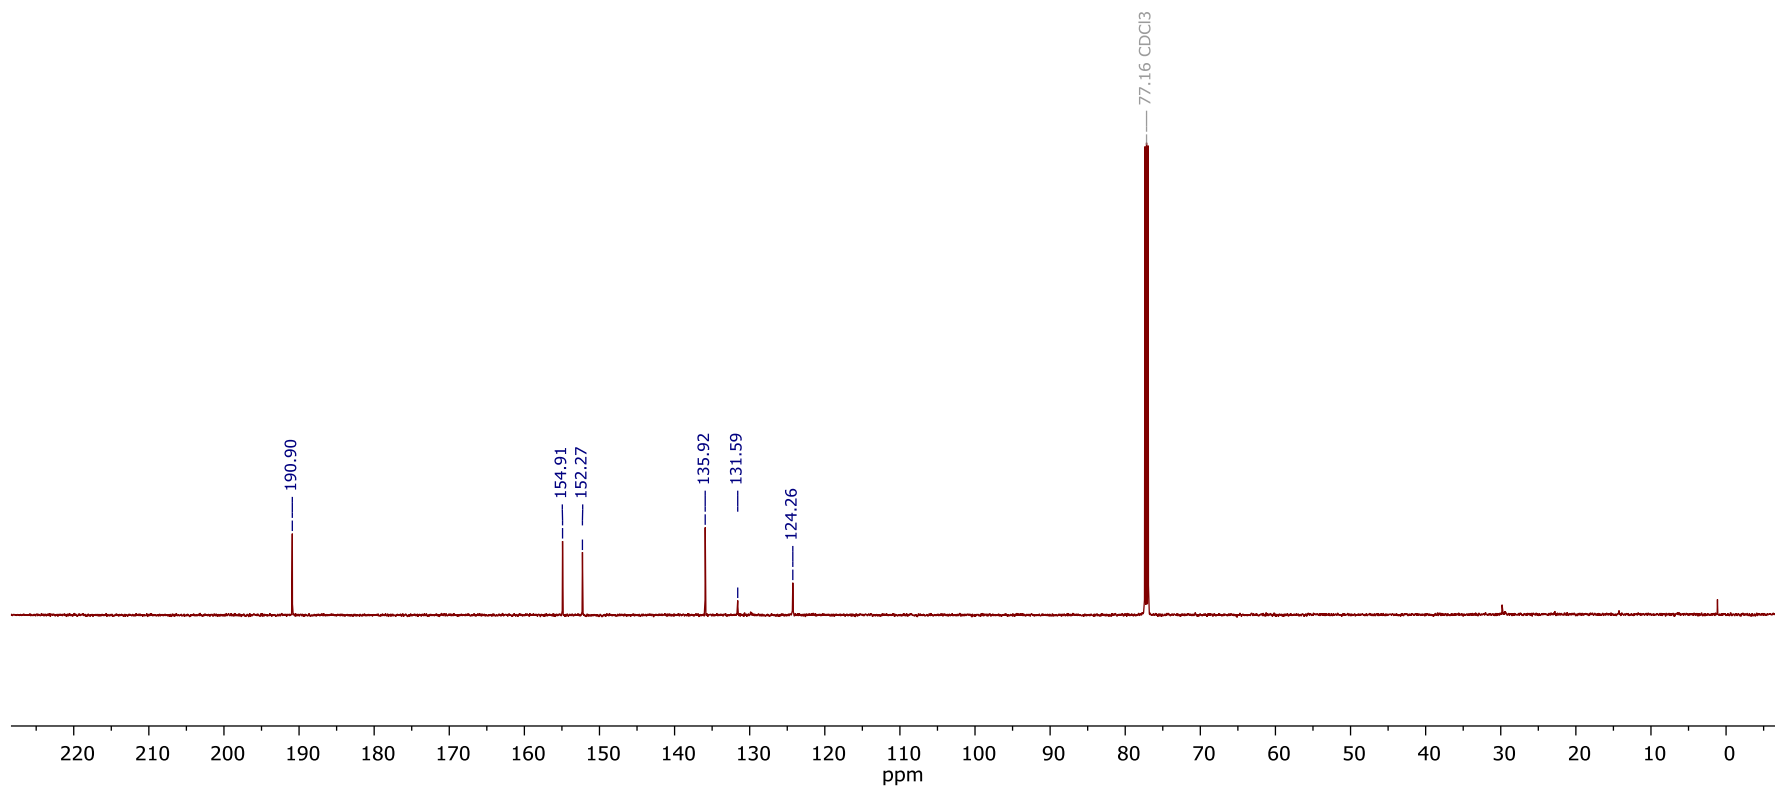

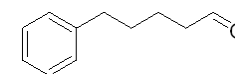

**3q**,  $^1\text{H}$  NMR  
400 MHz,  $\text{CDCl}_3$   
NMR yield

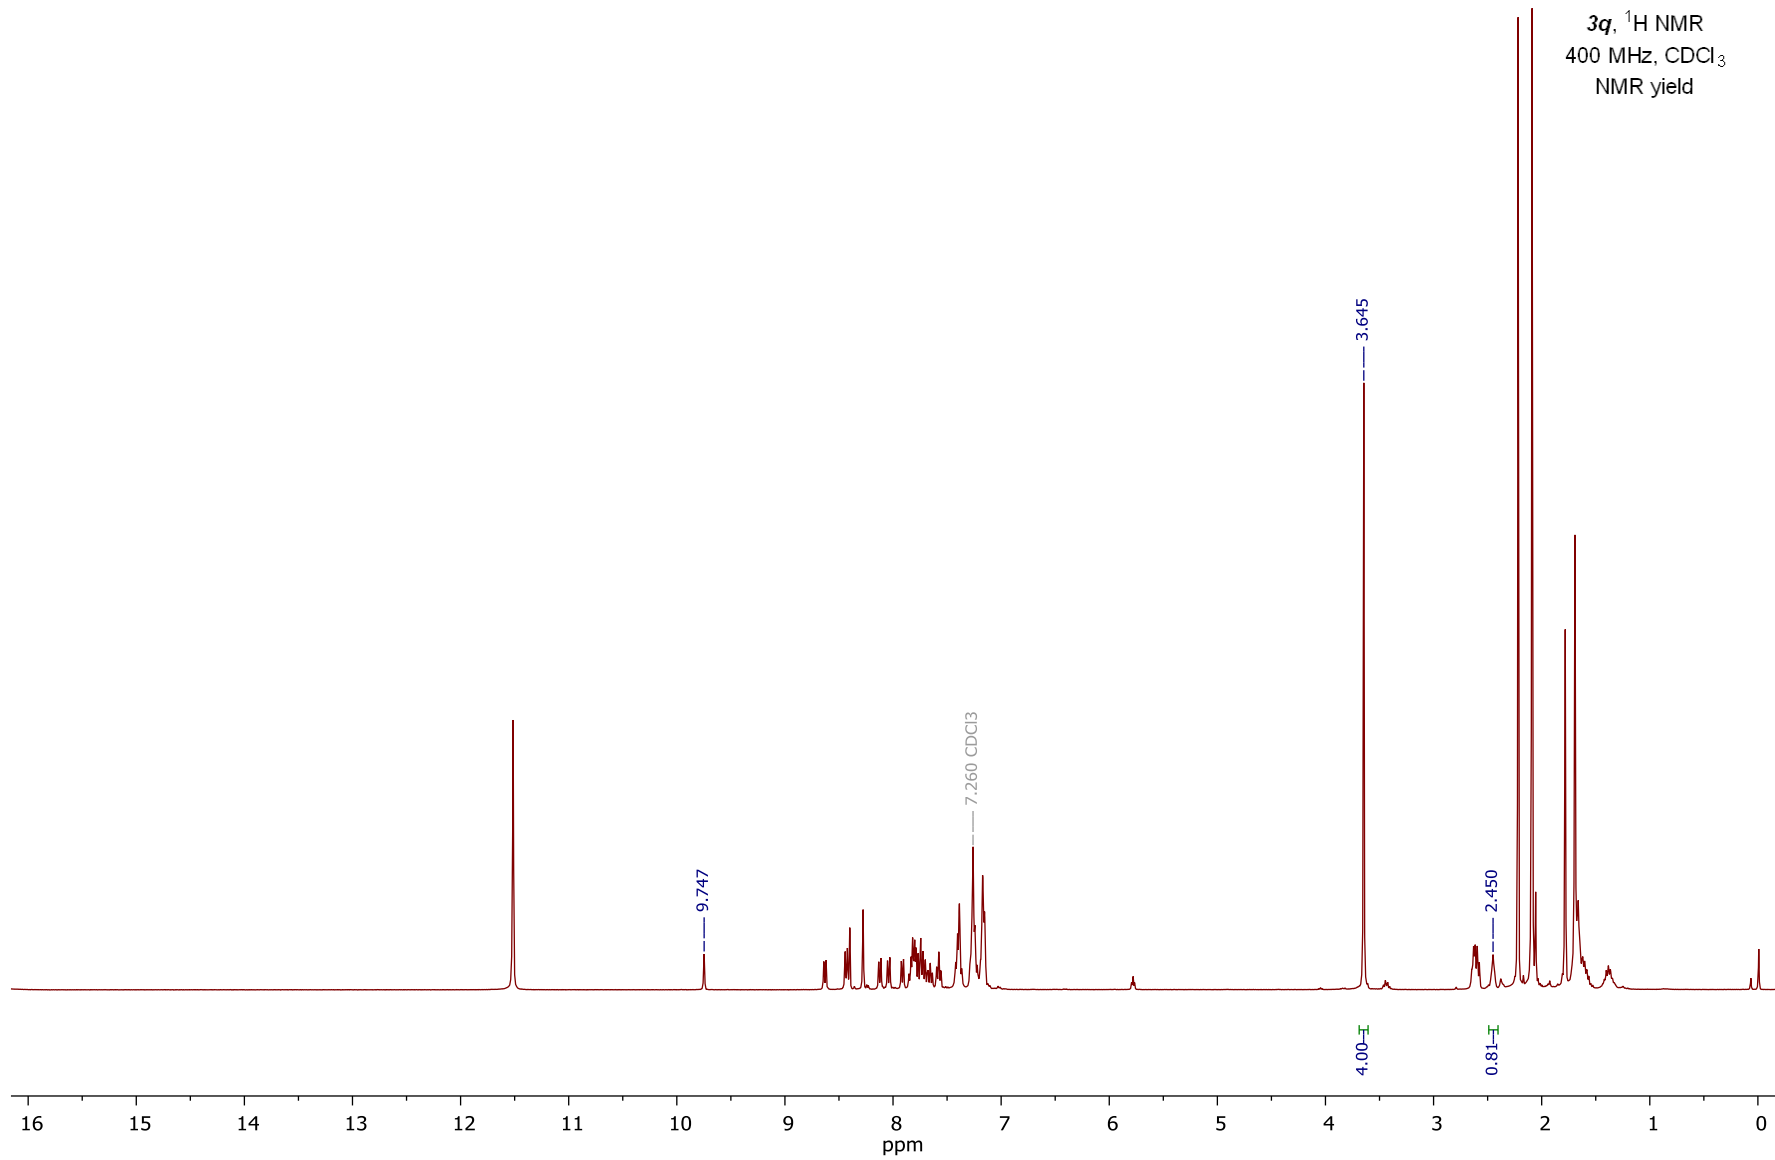

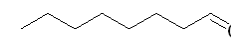

3r, <sup>1</sup>H NMR  
400 MHz, CDCl<sub>3</sub>  
NMR yield

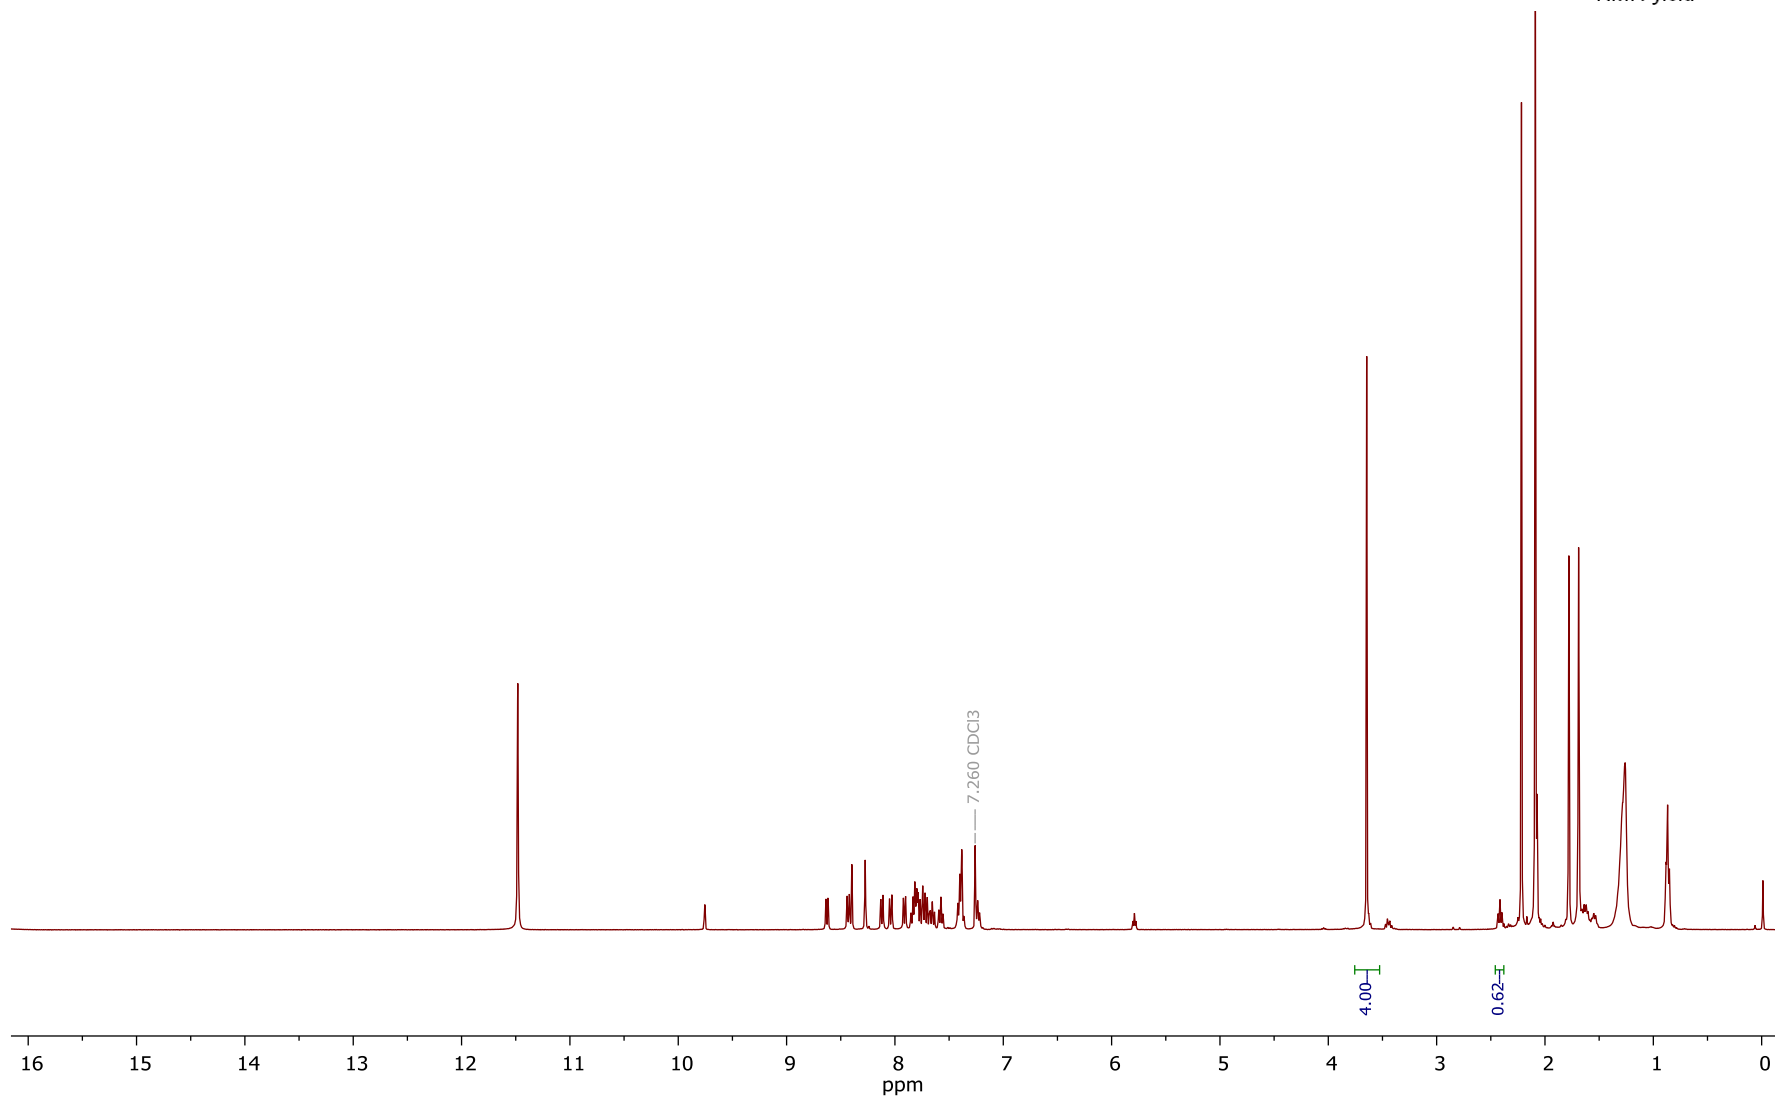

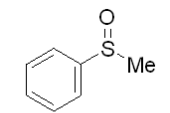

4, <sup>1</sup>H NMR  
400 MHz, CDCl<sub>3</sub>

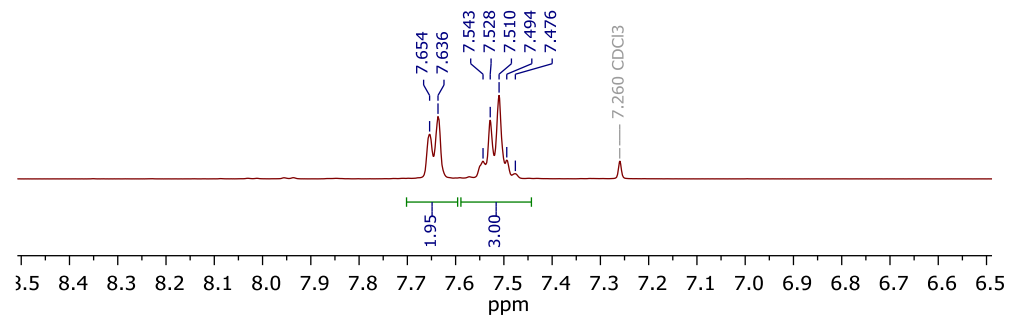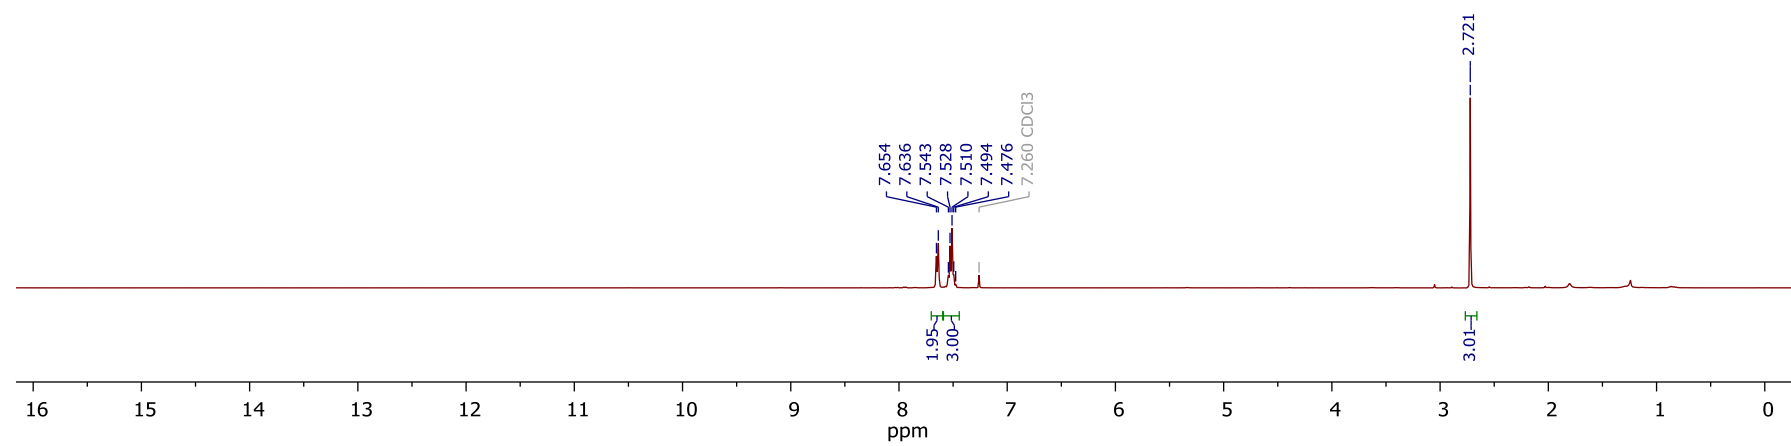

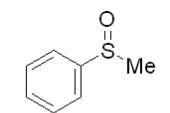

4, <sup>13</sup>C NMR  
100 MHz, CDCl<sub>3</sub>

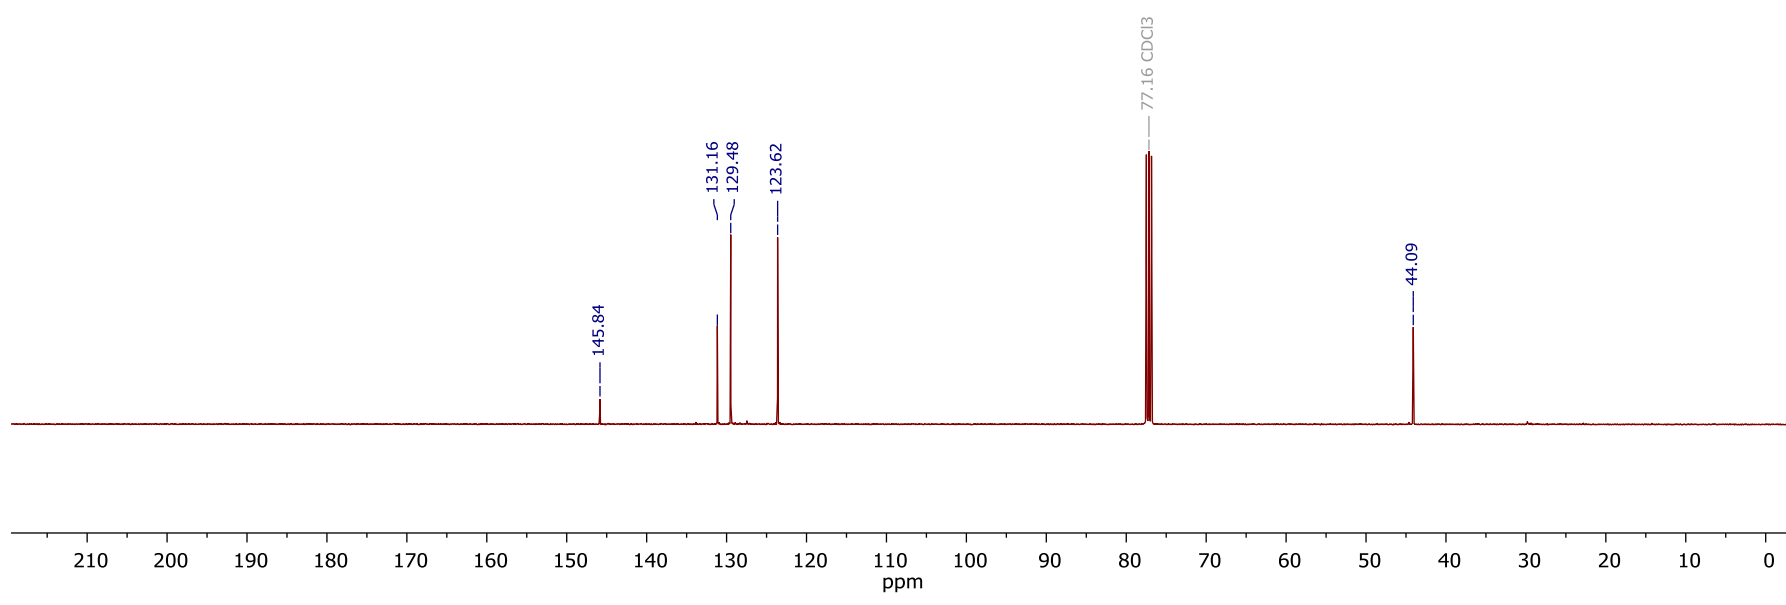

Supplement: d4cc05058d1.pdf [file d4cc05058d1.pdf]
